# Supplementary material for: Comprehensive analysis of macrophage-related genes in prostate cancer by integrated analysis of single-cell and bulk RNA sequencing
Source: publisher site journal article supplement (doi:10.18632/aging.205727), 2024-04-24
Supplement: Supplementary file [file aging-v16i8-205727-supplementary-material-SD1.pdf]

## SUPPLEMENTARY FIGURES

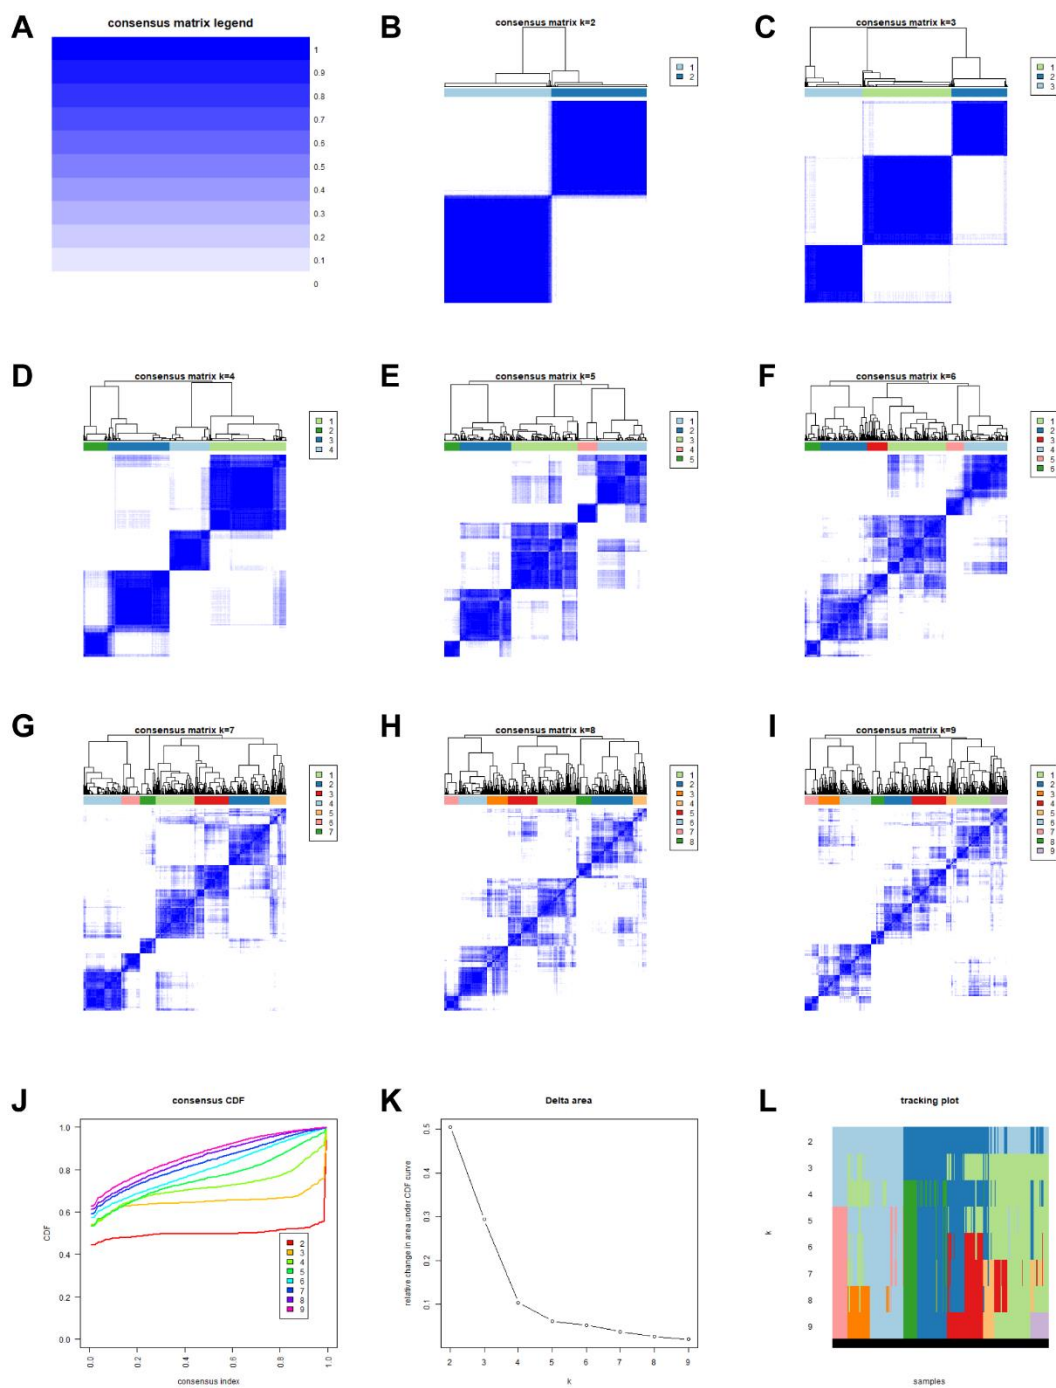

**Supplementary Figure 1.** (A) The legend of the consensus matrix. (B–I) Consensus clustering matrix when  $k = 2-9$ . (J) Consensus clustering CDF with  $k$  valued 2 to 9. (K) Relative change in area under CDF curve for  $k = 2$  to 9. (L) Item tracking plot.

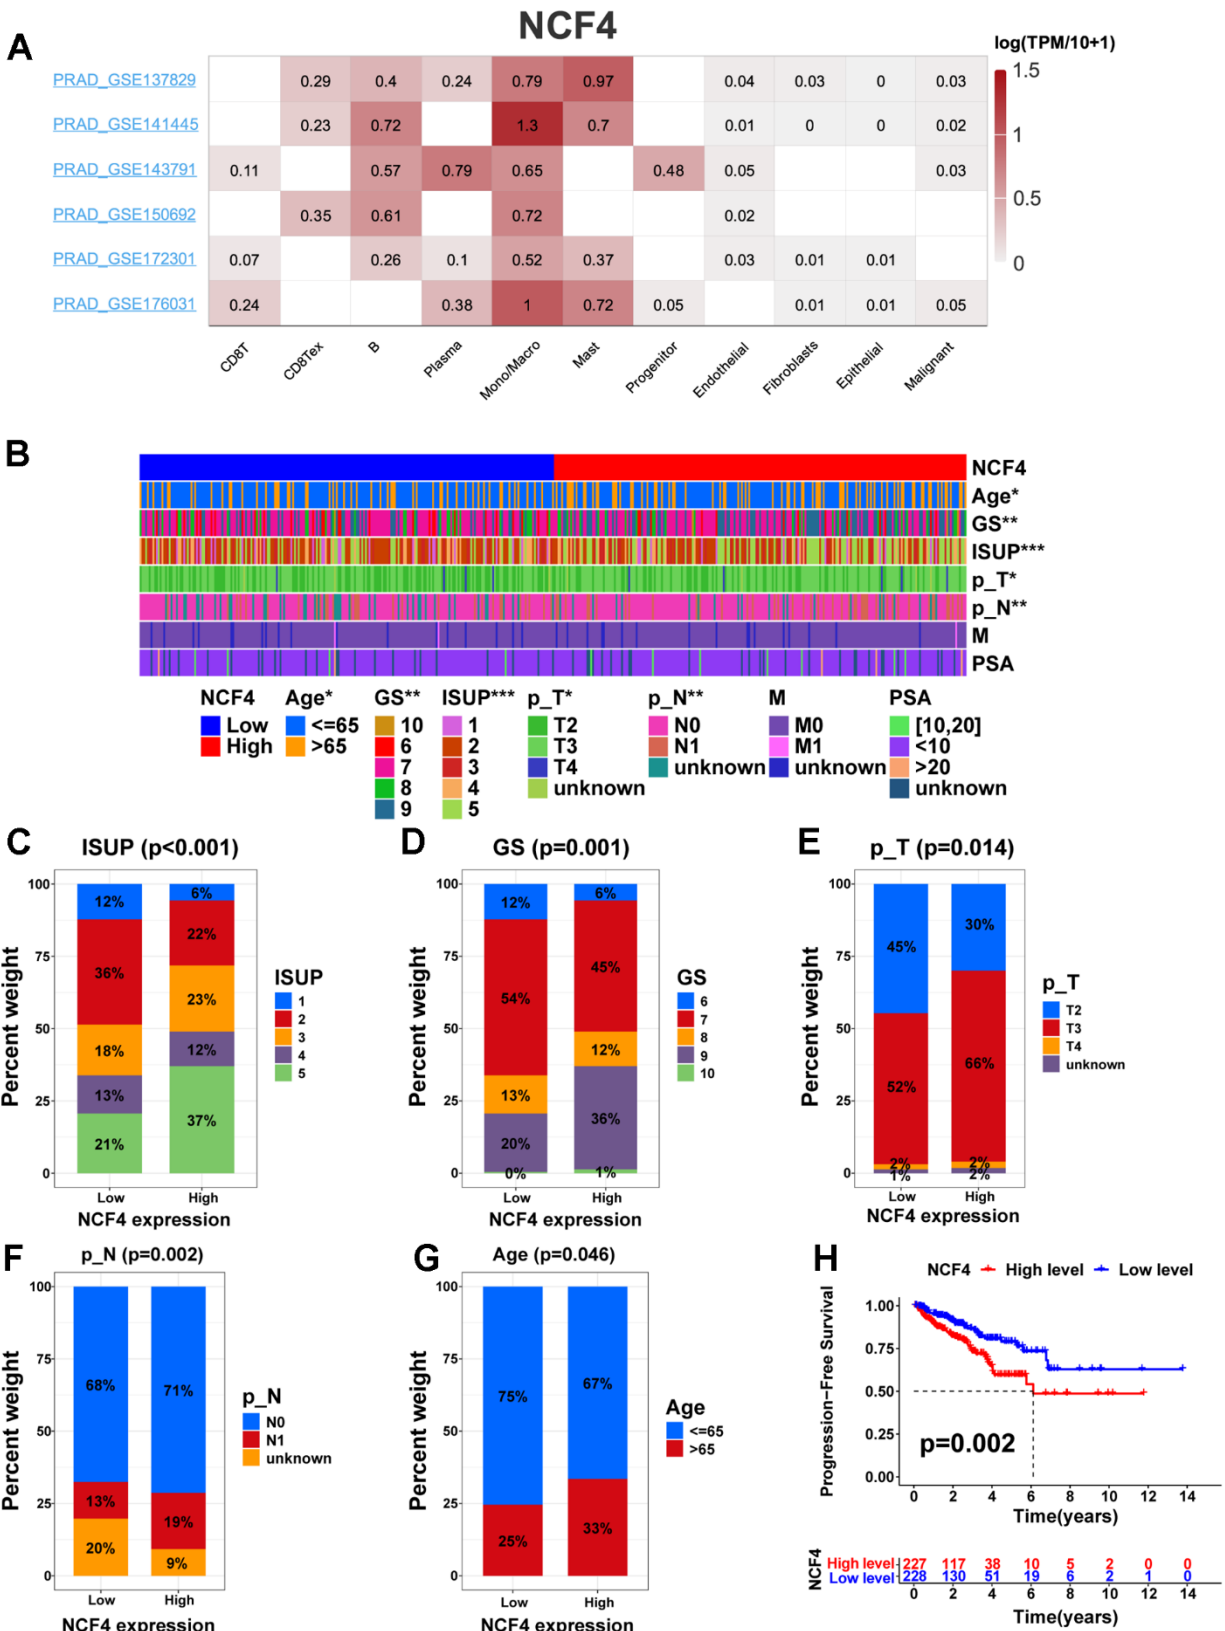

**Supplementary Figure 2.** (A) Utilizing the TISCH database to identify the expression patterns of NCF4 in immune and nonimmune cells across all six PRAD single-cell datasets. (B) Heatmap of NCF4 expression and clinicopathologic characteristics. (C–G) Relationship between ISUP, GS, p\_T stage, p\_N stage, Age, and the NCF4 expression. (H) Prognostic comparison between NCF4 high- and low-expression groups.
