# Supplementary material for: Comprehensive analysis of macrophage-related genes in prostate cancer by integrated analysis of single-cell and bulk RNA sequencing
Source: publisher site journal article supplement (doi:10.18632/aging.205727), 2024-04-24
Supplement: Supplementary file [file aging-v16i8-205727-supplementary-material-SD2.pdf]

## SUPPLEMENTARY TABLE

**Supplementary Table 1. Detailed information on the PCa cohort used in this study.**

| <b>Datasets</b> | <b>Platform</b>                                                                   | <b>Number of input samples(tumor/normal)</b> | <b>Application</b>                                                      |
|-----------------|-----------------------------------------------------------------------------------|----------------------------------------------|-------------------------------------------------------------------------|
| GSE141445       | GPL24676 Illumina NovaSeq 6000 (Homo sapiens)                                     | 12/-                                         | Identification of Macrophage-Cell Marker Genes                          |
| TCGA-PRAD       | Illumina HumanHT-12 V4.0 expression beadchip                                      | 501/52                                       | WGCNA, Molecular subtypes, Construction of the prognostic signature,... |
| CPGEA           | Illumina HiSeq X TEN                                                              | 136/136                                      | WGCNA, External validation of the signature                             |
| DKFZ-PRAD       | Illumina HumanHT-12 V3.0 expression beadchip                                      | 81/-                                         | External validation of the signature                                    |
| MSKCC-PRAD      | Affymetrix Human Exon 1.0 ST Array                                                | 140/-                                        | External validation of the signature                                    |
| GSE116918       | GPL25318 [ADXPCv1a520642] Almac Diagnostics Prostate Disease Specific Array (DSA) | 248/-                                        | External validation of the signature                                    |
| GSE70768        | GPL10558 Illumina HumanHT-12 V4.0 expression beadchip                             | 126/-                                        | WGCNA, External validation of the signature                             |
| GSE70769        | GPL10558 Illumina HumanHT-12 V4.0 expression beadchip                             | 92/-                                         | External validation of the signature                                    |
| GSE46602        | GPL570 [HG-U133_Plus_2] Affymetrix Human Genome U133 Plus 2.0 Array               | 36/-                                         | External validation of the signature                                    |
| GSE70770        | GPL10558 Illumina HumanHT-12 V4.0 expression beadchip                             | 203/-                                        | External validation of the signature                                    |
