# Supplementary material for: Comprehensive analysis of macrophage-related genes in prostate cancer by integrated analysis of single-cell and bulk RNA sequencing
Source: publisher site journal article supplement (doi:10.18632/aging.205727), 2024-04-24
Supplement: Supplementary file [file aging-v16i8-205727-supplementary-material-SD8.pdf]

**Supplementary Table 7. The 65 intersection genes.**

---

GMFG  
HLA-DPA1  
CTSZ  
APOE  
APOC1  
C3AR1  
EVI2B  
STX11  
HLA-DRA  
LGALS9  
LY96  
FCER1G  
TMEM176A  
FCGR2A  
HCLS1  
ARHGDIB  
C1QC  
C1QA  
C1orf162  
CD53  
TNFSF13B  
TYROBP  
LST1  
ARPC1B  
HLA-B  
FXD5  
HLA-DPB1  
VSIG4  
HCST  
AIF1  
CD4  
IFI30  
CD74  
GPNMB  
CD48  
SPI1  
CTSS  
TMEM176B  
PLAU  
PLEK  
CD163  
CSF1R  
ADAP2  
SLCO2B1  
CD37  
CPVL  
ITGB2  
MS4A6A

RNASE6  
IGSF6  
HLA-DQB1  
HLA-DQA2  
CYBB  
HLA-DQA1  
TYMP  
UCP2  
CYBA  
TMSB4X  
LAPTM5  
CD14  
C1QB  
ALOX5AP  
HLA-DMA  
FCGR2B  
LY86

---
