# Supplementary material for: Comprehensive analysis of macrophage-related genes in prostate cancer by integrated analysis of single-cell and bulk RNA sequencing
Source: Aging (Albany NY). 2024 Apr 24;16(8):6809–38. doi: 10.18632/aging.205727 (PMC11087116; doi:10.18632/aging.205727)
Supplement: Supplementary Table 2 [file aging-16-205727-s003.xlsx]

## Sheet: Supplementary Table 2
Supplementary Table 2. Cluster marker genes.
p_val	avg_log2FC	pct.1	pct.2	p_val_adj	cluster	gene
0	2.83456	0.614	0.227	0	0	MIPEP
0	2.80907	0.985	0.39	0	0	MSMB
0	2.75714	0.753	0.304	0	0	LINC01088
0	2.55105	0.927	0.413	0	0	TFF3
0	2.30835	0.944	0.567	0	0	H2AFJ
0	2.25108	0.845	0.438	0	0	TRGC1
0	2.05328	0.507	0.232	0	0	AGR2
0	2.04124	0.999	0.776	0	0	KLK3
0	1.78532	0.604	0.346	0	0	PCA3
0	1.70217	0.893	0.545	0	0	PDLIM5
0	1.61213	0.563	0.403	0	0	FXYD3
0	1.59021	0.826	0.436	0	0	SPON2
0	1.4887	0.705	0.608	0	0	DBI
0	1.37677	0.663	0.541	0	0	MPC2
0	1.35546	0.922	0.778	0	0	MT-ND3
0	1.05872	0.875	0.82	0	0	SERF2
0	1.01657	0.911	0.688	0	0	KLK2
0	-1.00623	0.1	0.479	0	0	HSPH1
0	-1.03807	0.106	0.537	0	0	PPP1R15A
0	-1.08828	0.019	0.293	0	0	AC020916.1
0	-1.09783	0.082	0.563	0	0	EIF5
0	-1.10581	0.066	0.555	0	0	ARPC2
0	-1.10769	0.067	0.453	0	0	TSC22D3
0	-1.12329	0.06	0.465	0	0	NPC2
0	-1.15881	0.159	0.714	0	0	EEF1B2
0	-1.19245	0.46	0.79	0	0	TMSB10
0	-1.20249	0.054	0.406	0	0	ZFP36L2
0	-1.2093	0.02	0.264	0	0	CREM
0	-1.21041	0.029	0.372	0	0	CDKN1A
0	-1.26616	0.137	0.699	0	0	YBX1
0	-1.27911	0.082	0.379	0	0	FABP5
0	-1.29391	0.083	0.585	0	0	CALM1
0	-1.36461	0.014	0.347	0	0	CEBPD
0	-1.3781	0.053	0.417	0	0	ID2
0	-1.39073	0.08	0.582	0	0	SH3BGRL3
0	-1.41573	0.012	0.357	0	0	ATP1B3
0	-1.43046	0.002	0.289	0	0	CNN3
0	-1.43221	0.105	0.508	0	0	GADD45B
0	-1.4355	0.014	0.275	0	0	IFITM2
0	-1.47165	0.045	0.327	0	0	CALD1
0	-1.53028	0.051	0.471	0	0	CD59
0	-1.54573	0.022	0.403	0	0	IRF1
0	-1.68462	0.012	0.296	0	0	GSTP1
0	-1.69099	0.022	0.269	0	0	HLA-DPB1
0	-1.69546	0.027	0.288	0	0	HMGA1
0	-1.69703	0.033	0.288	0	0	LGALS1
0	-1.75841	0.03	0.495	0	0	LDHA
0	-1.81338	0.007	0.25	0	0	ID3
0	-1.84448	0.098	0.584	0	0	NFKBIA
0	-1.90386	0.008	0.257	0	0	TIMP1
0	-1.97545	0.079	0.589	0	0	HLA-C
0	-2.05498	0.05	0.473	0	0	S100A10
0	-2.06846	0.006	0.297	0	0	IER3
0	-2.13937	0.01	0.421	0	0	ANXA2
0	-2.1606	0.021	0.346	0	0	IFITM3
0	-2.17141	0.032	0.365	0	0	ANXA1
0	-2.19607	0.024	0.313	0	0	SRGN
0	-2.33196	0.037	0.459	0	0	SOD2
0	-2.34968	0.01	0.429	0	0	HLA-E
0	-2.41088	0.045	0.505	0	0	HLA-A
0	-2.49013	0.079	0.509	0	0	S100A6
0	-2.61891	0.002	0.264	0	0	RGCC
0	-2.67694	0.469	0.806	0	0	MT2A
0	-2.74076	0.04	0.328	0	0	CD74
0	-2.74242	0.029	0.446	0	0	VIM
0	-2.78886	0.005	0.339	0	0	TM4SF1
0	-2.87423	0.326	0.866	0	0	B2M
0	-2.98014	0.028	0.518	0	0	HLA-B
0	-3.25333	0.034	0.358	0	0	CLU
0	-3.25715	0.001	0.283	0	0	SPARC
0	-3.65513	0.004	0.278	0	0	IGFBP7
0	-3.76749	0.008	0.365	0	0	MGP
1.48e-302	-2.45592	0.037	0.282	3.59e-298	0	NPY
2.78e-270	-2.18393	0.272	0.606	6.76e-266	0	MT1X
3.41e-262	-1.05869	0.05	0.285	8.31e-258	0	LGALS3
4.75e-262	1.31089	0.579	0.487	1.16e-257	0	SMS
5.46e-262	-2.20211	0.043	0.267	1.33e-257	0	HLA-DRA
8.17e-257	-1.72325	0.178	0.474	1.99e-252	0	MT1E
9.41e-244	1.26751	0.556	0.441	2.29e-239	0	RDH11
4.89e-231	-1.52664	0.063	0.279	1.19e-226	0	ADIRF
1.17e-196	-1.5959	0.088	0.296	2.84e-192	0	PLA2G2A
1.33e-191	1.50683	0.439	0.334	3.25e-187	0	FOLH1
6.91e-189	-1.05128	0.795	0.962	1.68e-184	0	FTH1
8.68e-187	-1.54929	0.072	0.268	2.11e-182	0	HSPA6
7.39e-178	-1.19961	0.587	0.832	1.8e-173	0	HSP90AA1
5.42e-177	1.85963	0.401	0.303	1.32e-172	0	ABCC4
4.08e-165	1.36447	0.458	0.363	9.93e-161	0	GDF15
2.2e-164	1.11737	0.498	0.409	5.36e-160	0	TSPAN1
3.72e-148	1.45916	0.433	0.368	9.05e-144	0	MESP1
5.69e-138	1.7571	0.393	0.324	1.38e-133	0	PART1
8.3e-136	-2.09557	0.095	0.261	2.02e-131	0	MT1G
2.34e-135	1.71896	0.38	0.3	5.68e-131	0	TRPM8
4.95e-125	1.5621	0.412	0.355	1.2e-120	0	MGST1
3.77e-123	2.10784	0.326	0.241	9.16e-119	0	SYCE1L
1.13e-108	-1.02137	0.812	0.839	2.74e-104	0	TMSB4X
3.37e-96	1.09271	0.522	0.595	8.2e-92	0	SERP1
9.41e-63	1.17847	0.398	0.395	2.29e-58	0	KRT8
9.38e-62	1.18532	0.372	0.351	2.28e-57	0	STEAP2
3.5e-52	1.67447	0.271	0.228	8.51e-48	0	TMSB15A
8.27e-51	1.27355	0.363	0.361	2.01e-46	0	TMPRSS2
1.19e-46	1.59165	0.368	0.387	2.89e-42	0	CYB5A
1.1e-31	1.10609	0.241	0.429	2.67e-27	0	PET100
3.8e-29	1.35012	0.413	0.507	9.26e-25	0	UQCR10
1.68e-27	1.00048	0.169	0.288	4.09e-23	0	HOXB13
1.76e-24	1.10669	0.16	0.269	4.29e-20	0	MIA3
9.42e-24	1.1122	0.15	0.252	2.29e-19	0	GLMP
6.68e-23	1.20971	0.313	0.331	1.63e-18	0	GOLM1
1.52e-21	1.32994	0.279	0.284	3.69e-17	0	OR51E2
1.58e-19	1.48087	0.262	0.26	3.85e-15	0	LINC00662
3.79e-19	1.52669	0.303	0.332	9.23e-15	0	CCNG2
6.88e-19	1.39989	0.293	0.314	1.67e-14	0	MCCC2
4.74e-18	1.10283	0.199	0.317	1.15e-13	0	MAGED2
3e-13	1.32492	0.329	0.388	7.31e-09	0	TSTD1
1.62e-12	1.01645	0.296	0.48	3.95e-08	0	COX17
1.72e-08	1.02304	0.264	0.402	0.000418664	0	ASAH1
2.76e-07	1.26095	0.231	0.34	0.00670451	0	NSMCE1
0	4.14376	0.869	0.193	0	1	CLU
0	4.06426	0.615	0.044	0	1	SERPINE2
0	3.91396	0.266	0.009	0	1	MSMP
0	3.71022	0.456	0.064	0	1	COL2A1
0	3.56367	0.577	0.033	0	1	COL9A3
0	3.47683	0.29	0.01	0	1	CHI3L1
0	3.41098	0.507	0.187	0	1	HMGA1
0	3.2822	0.626	0.045	0	1	CYTL1
0	3.22849	0.426	0.037	0	1	SERPINA3
0	3.18591	0.619	0.027	0	1	RBP4
0	3.03076	0.384	0.052	0	1	KCNMA1
0	3.00778	0.279	0.012	0	1	TNFRSF11B
0	2.98982	0.509	0.029	0	1	MIA
0	2.76483	0.55	0.042	0	1	SCRG1
0	2.70557	0.385	0.106	0	1	COL9A2
0	2.70496	0.427	0.072	0	1	BGN
0	2.69175	0.584	0.163	0	1	SPARC
0	2.65218	0.452	0.148	0	1	SOD3
0	2.63964	0.382	0.1	0	1	TNFRSF12A
0	2.51411	0.536	0.343	0	1	SOD2
0	2.50195	0.497	0.033	0	1	SNORC
0	2.4539	0.861	0.631	0	1	CST3
0	2.44985	0.353	0.051	0	1	SERPINA1
0	2.44536	0.76	0.212	0	1	MGP
0	2.41347	0.371	0.062	0	1	DCN
0	2.39682	0.338	0.024	0	1	S100A1
0	2.37965	0.595	0.055	0	1	ECRG4
0	2.37272	0.255	0.011	0	1	HAPLN1
0	2.31087	0.398	0.068	0	1	FRZB
0	2.2934	0.621	0.345	0	1	S100A10
0	2.17956	0.844	0.717	0	1	MT2A
0	2.12062	0.741	0.365	0	1	S100A6
0	1.85569	0.253	0.057	0	1	MEG3
0	1.78889	0.486	0.233	0	1	TM4SF1
0	1.70773	0.28	0.037	0	1	FGFBP2
0	1.48138	0.97	0.92	0	1	FTH1
0	1.43648	0.916	0.823	0	1	EIF1
0	1.06589	0.85	0.796	0	1	SAT1
0	1.0168	0.977	0.949	0	1	RPL21
0	-1.00196	0.704	0.929	0	1	RPS29
0	-1.00447	0.039	0.405	0	1	NPDC1
0	-1.00553	0.037	0.395	0	1	LYPLA1
0	-1.00916	0.054	0.4	0	1	PPP3CA
0	-1.01622	0.049	0.4	0	1	TMEM141
0	-1.01725	0.072	0.479	0	1	NR4A1
0	-1.01727	0.477	0.891	0	1	SERF2
0	-1.04257	0.171	0.649	0	1	UQCR11
0	-1.04765	0.159	0.563	0	1	EGR1
0	-1.05847	0.1	0.524	0	1	KLF6
0	-1.05867	0.079	0.482	0	1	RHOB
0	-1.06839	0.048	0.456	0	1	CANX
0	-1.08828	0.007	0.339	0	1	MGST2
0	-1.09652	0.071	0.504	0	1	COX17
0	-1.10306	0.225	0.738	0	1	HSPA1A
0	-1.10746	0.029	0.35	0	1	TRIB1
0	-1.11386	0.052	0.39	0	1	APP
0	-1.139	0.027	0.348	0	1	SNHG19
0	-1.16207	0.015	0.323	0	1	FOXA1
0	-1.17206	0.068	0.538	0	1	NDUFB1
0	-1.17362	0.07	0.511	0	1	APLP2
0	-1.18264	0.016	0.337	0	1	MLPH
0	-1.18359	0.031	0.451	0	1	NDUFA3
0	-1.20457	0.012	0.346	0	1	BCAM
0	-1.2048	0.152	0.635	0	1	PPDPF
0	-1.20595	0.063	0.418	0	1	MGST1
0	-1.22893	0.042	0.434	0	1	NUDT4
0	-1.24061	0.05	0.427	0	1	TSC22D3
0	-1.24363	0.057	0.516	0	1	PPP1CB
0	-1.2445	0.088	0.579	0	1	ATP5ME
0	-1.25767	0.092	0.508	0	1	DHRS7
0	-1.25775	0.048	0.422	0	1	HEBP2
0	-1.26105	0.015	0.335	0	1	XAB2
0	-1.26234	0.01	0.325	0	1	SNHG14
0	-1.26378	0.729	0.968	0	1	MT-CO2
0	-1.28725	0.021	0.368	0	1	TPD52
0	-1.29436	0.021	0.35	0	1	SPDEF
0	-1.2961	0.055	0.463	0	1	SNHG25
0	-1.30031	0.014	0.373	0	1	ZBTB16
0	-1.30863	0.017	0.358	0	1	NEDD4L
0	-1.31854	0.267	0.784	0	1	HSPB1
0	-1.32053	0.202	0.701	0	1	DBI
0	-1.32281	0.042	0.433	0	1	TSTD1
0	-1.32973	0.035	0.403	0	1	PMEPA1
0	-1.3543	0.031	0.431	0	1	ASAH1
0	-1.36027	0.452	0.781	0	1	NEAT1
0	-1.37229	0.139	0.676	0	1	ATP5MC2
0	-1.37728	0.467	0.834	0	1	HSP90AA1
0	-1.41116	0.024	0.358	0	1	MCCC2
0	-1.41134	0.029	0.383	0	1	PLPP1
0	-1.41571	0.294	0.771	0	1	JUN
0	-1.4315	0.03	0.386	0	1	SORD
0	-1.44145	0.658	0.945	0	1	MT-CO1
0	-1.44452	0.162	0.659	0	1	DUSP1
0	-1.45607	0.042	0.399	0	1	NKX3-1
0	-1.46375	0.034	0.377	0	1	GOLM1
0	-1.47037	0.096	0.5	0	1	KRT18
0	-1.48756	0.016	0.378	0	1	CCNG2
0	-1.50795	0.142	0.622	0	1	FOSB
0	-1.51014	0.028	0.372	0	1	SLC45A3
0	-1.5185	0.07	0.585	0	1	JUND
0	-1.54833	0.12	0.572	0	1	SMS
0	-1.55436	0.012	0.328	0	1	OR51E2
0	-1.55901	0.054	0.453	0	1	KRT8
0	-1.578	0.275	0.767	0	1	FOS
0	-1.59487	0.031	0.423	0	1	SOX4
0	-1.61928	0.033	0.417	0	1	TMPRSS2
0	-1.63032	0.026	0.444	0	1	CYB5A
0	-1.63216	0.018	0.403	0	1	IGFBP2
0	-1.6678	0.148	0.637	0	1	MPC2
0	-1.68732	0.024	0.392	0	1	PART1
0	-1.68923	0.028	0.492	0	1	FOXP1
0	-1.69138	0.12	0.466	0	1	HLA-B
0	-1.77666	0.023	0.401	0	1	TXNIP
0	-1.78858	0.357	0.884	0	1	MT-ND3
0	-1.80739	0.29	0.794	0	1	TMSB10
0	-1.8145	0.014	0.368	0	1	TRPM8
0	-1.84699	0.073	0.488	0	1	TSPAN1
0	-1.88941	0.065	0.499	0	1	FXYD3
0	-1.90863	0.03	0.441	0	1	MESP1
0	-1.91604	0.011	0.377	0	1	ABCC4
0	-1.92892	0.023	0.411	0	1	STEAP2
0	-1.94044	0.362	0.797	0	1	KLK2
0	-1.97878	0.09	0.667	0	1	HSPA1B
0	-2.02095	0.022	0.334	0	1	AGR2
0	-2.04382	0.04	0.441	0	1	GDF15
0	-2.05913	0.062	0.533	0	1	RDH11
0	-2.16995	0.015	0.413	0	1	FOLH1
0	-2.1708	0.206	0.72	0	1	H2AFJ
0	-2.23224	0.162	0.581	0	1	TFF3
0	-2.31008	0.014	0.358	0	1	MIPEP
0	-2.44926	0.04	0.458	0	1	LINC01088
0	-2.46542	0.028	0.463	0	1	PCA3
0	-2.76407	0.117	0.702	0	1	PDLIM5
0	-2.76758	0.346	0.916	0	1	TMSB4X
0	-3.1698	0.057	0.595	0	1	SPON2
0	-3.17627	0.543	0.869	0	1	KLK3
0	-3.20273	0.036	0.605	0	1	TRGC1
0	-3.74601	0.093	0.585	0	1	MSMB
4.66e-308	-1.18377	0.021	0.332	1.13e-303	1	ALDH1A3
8e-307	-1.56427	0.007	0.301	1.95e-302	1	SYCE1L
1.26e-306	-1.19519	0.072	0.418	3.07e-302	1	TRPM4
2.31e-304	-1.15169	0.022	0.33	5.63e-300	1	ZG16B
2.69e-304	-1.14636	0.049	0.381	6.54e-300	1	ZFP36L2
1.35e-300	1.83703	0.621	0.542	3.28e-296	1	TXN
1.71e-300	-1.07916	0.043	0.367	4.17e-296	1	HES1
5.03e-295	-1.04616	0.013	0.305	1.22e-290	1	HOXB13
6.1e-295	-1.19904	0.009	0.298	1.48e-290	1	BASP1
4.47e-294	-1.14108	0.012	0.302	1.09e-289	1	HSD17B4
6.77e-293	-1.32306	0.015	0.308	1.65e-288	1	SPOCK1
1.59e-291	-1.12352	0.008	0.293	3.86e-287	1	ARHGEF26
1.8e-291	-1.47939	0.013	0.302	4.39e-287	1	LINC00662
1.06e-287	-1.02256	0.017	0.308	2.59e-283	1	FASN
2.05e-287	-1.18679	0.007	0.288	4.98e-283	1	SLC4A4
7.62e-286	-1.08345	0.042	0.353	1.85e-281	1	LRRC26
2.92e-285	2.13174	0.472	0.266	7.11e-281	1	ANXA1
5.01e-274	-1.11983	0.037	0.335	1.22e-269	1	KLK4
1.89e-248	2.11745	0.504	0.363	4.61e-244	1	CD59
1.34e-242	-1.68733	0.009	0.256	3.27e-238	1	IGF1
1.09e-241	-1.20622	0.019	0.274	2.66e-237	1	TMSB15A
4.06e-241	-1.07129	0.018	0.273	9.87e-237	1	INSR
1.29e-236	1.34931	0.642	0.609	3.14e-232	1	CD63
7.26e-233	-1.03993	0.012	0.254	1.77e-228	1	KLF2
9.89e-231	1.87128	0.272	0.102	2.41e-226	1	MFGE8
2.03e-225	-1.11696	0.108	0.408	4.95e-221	1	ACPP
3.69e-218	1.5441	0.594	0.58	8.99e-214	1	YBX1
1.04e-208	-1.77109	0.046	0.288	2.52e-204	1	SRGN
4.05e-199	-1.09455	0.026	0.253	9.86e-195	1	IFITM2
4e-192	1.69534	0.29	0.128	9.72e-188	1	CAV1
5.71e-191	-2.30988	0.032	0.252	1.39e-186	1	HLA-DRA
2.73e-190	1.07906	0.643	0.686	6.64e-186	1	HNRNPA1
2.58e-185	1.73278	0.37	0.214	6.27e-181	1	GSTP1
6.26e-174	1.89226	0.305	0.155	1.52e-169	1	EMP3
5.22e-171	-2.13275	0.077	0.3	1.27e-166	1	CD74
3.92e-168	2.01373	0.331	0.184	9.54e-164	1	S100A13
4.95e-167	1.78495	0.44	0.318	1.2e-162	1	ANXA2
5.11e-162	1.68088	0.279	0.132	1.24e-157	1	FN1
3.54e-152	1.27779	0.579	0.601	8.62e-148	1	EEF1B2
1.61e-141	1.91555	0.498	0.468	3.91e-137	1	RAN
1.39e-113	-1.46072	0.618	0.776	3.37e-109	1	B2M
1.15e-103	1.25566	0.56	0.626	2.81e-99	1	EIF4A1
1.9e-93	2.29037	0.378	0.302	4.63e-89	1	CCN1
6.42e-88	1.1205	0.555	0.642	1.56e-83	1	CHCHD2
2.04e-81	1.32564	0.337	0.238	4.96e-77	1	PLA2G2A
3.18e-80	1.47874	0.314	0.223	7.73e-76	1	LGALS3
1.13e-59	1.68081	0.417	0.421	2.74e-55	1	ANXA5
1.97e-49	1.24955	0.478	0.546	4.79e-45	1	PRDX1
9.04e-47	1.45387	0.442	0.483	2.2e-42	1	SH3BGRL3
2.57e-37	1.19329	0.347	0.312	6.25e-33	1	FABP5
7.62e-21	1.5554	0.356	0.401	1.85e-16	1	ENO1
1.67e-19	1.01088	0.194	0.326	4.06e-15	1	SSBP1
1.73e-11	1.35397	0.346	0.407	4.22e-07	1	LDHA
1.21e-10	1.52011	0.324	0.375	2.94e-06	1	PKM
2.67e-10	1.31348	0.379	0.477	6.49e-06	1	EIF5
1.63e-09	1.09084	0.248	0.385	3.96e-05	1	RBM8A
1.37e-08	1.32907	0.37	0.465	0.000333429	1	SQSTM1
9.83e-07	1.58183	0.237	0.254	0.0239099	1	MRPS6
0	4.04161	0.821	0.133	0	2	CXCR4
0	4.02334	0.647	0.023	0	2	CCL5
0	3.54699	0.801	0.064	0	2	IL32
0	3.41524	0.388	0.012	0	2	NKG7
0	3.25734	0.537	0.008	0	2	IL7R
0	3.06991	0.428	0.069	0	2	CCL4
0	2.95762	0.732	0.052	0	2	CD52
0	2.95212	0.696	0.007	0	2	CD3D
0	2.76925	0.586	0.102	0	2	RGS1
0	2.72411	0.471	0.005	0	2	TRBC1
0	2.72198	0.679	0.044	0	2	PTPRC
0	2.71383	0.591	0.007	0	2	TRAC
0	2.6486	0.745	0.299	0	2	ZFP36L2
0	2.57102	0.546	0.009	0	2	TRBC2
0	2.52031	0.713	0.344	0	2	TSC22D3
0	2.49354	0.979	0.765	0	2	HSP90AA1
0	2.48341	0.3	0.004	0	2	KLRB1
0	2.4778	0.629	0.18	0	2	CREM
0	2.46814	0.563	0.004	0	2	CD2
0	2.43837	0.758	0.14	0	2	CRIP1
0	2.41299	0.4	0.004	0	2	GZMA
0	2.38782	0.579	0.076	0	2	DUSP2
0	2.37798	0.745	0.147	0	2	S100A4
0	2.37261	0.605	0.004	0	2	CD3E
0	2.32943	0.597	0.044	0	2	HCST
0	2.31968	0.856	0.204	0	2	SRGN
0	2.25263	0.586	0.151	0	2	TNFAIP3
0	2.23789	0.421	0.013	0	2	CST7
0	2.19947	0.946	0.366	0	2	HLA-A
0	2.1769	0.948	0.61	0	2	BTG1
0	2.16874	0.551	0.039	0	2	FYB1
0	2.16502	0.567	0.036	0	2	CORO1A
0	2.15267	0.875	0.567	0	2	DNAJB1
0	2.14043	0.295	0.004	0	2	GZMH
0	2.11783	0.999	0.733	0	2	B2M
0	2.10915	0.375	0.072	0	2	DUSP4
0	2.1034	0.549	0.069	0	2	CD69
0	2.07805	0.49	0.022	0	2	CYTIP
0	2.06802	0.347	0.017	0	2	LTB
0	2.05692	0.717	0.374	0	2	HSPH1
0	2.03787	0.417	0.008	0	2	CD7
0	2.00929	0.458	0.003	0	2	CD3G
0	1.99115	0.46	0.132	0	2	ZNF331
0	1.95675	0.956	0.372	0	2	HLA-B
0	1.93528	0.42	0.025	0	2	DOK2
0	1.93429	0.855	0.648	0	2	HSPA1A
0	1.8682	0.503	0.071	0	2	PLAAT4
0	1.86	0.546	0.186	0	2	LINC-PINT
0	1.85253	0.911	0.448	0	2	HLA-C
0	1.8439	0.471	0.021	0	2	IL2RG
0	1.84277	0.413	0.024	0	2	RUNX3
0	1.84066	0.608	0.278	0	2	CACYBP
0	1.82838	0.418	0.034	0	2	CLEC2D
0	1.82378	0.466	0.053	0	2	FYN
0	1.82221	0.518	0.054	0	2	CD53
0	1.817	0.527	0.13	0	2	STK4
0	1.80095	0.661	0.152	0	2	ARHGDIB
0	1.79786	0.654	0.322	0	2	TXNIP
0	1.78329	0.531	0.178	0	2	PPP2R5C
0	1.77246	0.394	0.002	0	2	BCL11B
0	1.76655	0.675	0.15	0	2	CYBA
0	1.74775	0.391	0.069	0	2	AC058791.1
0	1.73971	0.486	0.151	0	2	LEPROTL1
0	1.73946	0.424	0.021	0	2	PCED1B-AS1
0	1.73892	0.564	0.194	0	2	ELF1
0	1.69948	0.468	0.043	0	2	CD48
0	1.64205	0.471	0.091	0	2	CELF2
0	1.63091	0.364	0.044	0	2	TUBA4A
0	1.62904	0.456	0.044	0	2	RAC2
0	1.60699	0.269	0.002	0	2	GPR171
0	1.59176	0.379	0.052	0	2	ARL4C
0	1.56932	0.422	0.052	0	2	SAMSN1
0	1.5646	0.997	0.82	0	2	TMSB4X
0	1.55957	0.439	0.119	0	2	STK17B
0	1.55686	0.379	0.025	0	2	ACAP1
0	1.53212	0.37	0.016	0	2	SPOCK2
0	1.5214	0.468	0.165	0	2	EVL
0	1.51135	0.402	0.089	0	2	BIRC3
0	1.50737	0.368	0.022	0	2	IKZF1
0	1.49562	0.263	0.006	0	2	CTSW
0	1.4797	0.487	0.067	0	2	CD37
0	1.47958	0.319	0.023	0	2	SLA
0	1.47877	0.473	0.098	0	2	GMFG
0	1.46577	0.551	0.129	0	2	ISG20
0	1.45721	0.407	0.046	0	2	LSP1
0	1.43402	0.377	0.075	0	2	PIK3IP1
0	1.4217	0.319	0.039	0	2	LINC00513
0	1.40079	0.344	0.086	0	2	AC016831.5
0	1.39725	0.415	0.089	0	2	HLA-F
0	1.39021	0.314	0.022	0	2	SYTL3
0	1.38258	0.385	0.073	0	2	ETS1
0	1.37362	0.332	0.007	0	2	LCK
0	1.36502	0.335	0.077	0	2	CLEC2B
0	1.36253	0.495	0.09	0	2	LAPTM5
0	1.36174	0.821	0.302	0	2	HLA-E
0	1.36134	0.301	0.035	0	2	AKNA
0	1.34537	0.305	0.003	0	2	CD96
0	1.32638	0.311	0.025	0	2	LIME1
0	1.32632	0.323	0.032	0	2	RHOH
0	1.32612	0.324	0.034	0	2	EVI2A
0	1.31149	0.27	0.003	0	2	GZMM
0	1.30823	0.273	0.003	0	2	CD247
0	1.29988	0.302	0.039	0	2	ADGRE5
0	1.29351	0.584	0.18	0	2	CD44
0	1.29301	0.274	0.009	0	2	IKZF3
0	1.275	0.408	0.109	0	2	PSMB9
0	1.27001	0.447	0.11	0	2	STK17A
0	1.26663	0.279	0.022	0	2	PTPN7
0	1.26083	0.276	0.042	0	2	GPR183
0	1.2337	0.334	0.051	0	2	WIPF1
0	1.22305	0.309	0.062	0	2	UCP2
0	1.2077	0.268	0.006	0	2	STAT4
0	1.20543	0.314	0.046	0	2	GPSM3
0	1.2049	0.798	0.451	0	2	SH3BGRL3
0	1.19827	0.334	0.058	0	2	ALOX5AP
0	1.19206	0.263	0.002	0	2	ITK
0	1.18828	0.293	0.039	0	2	ITGB2
0	1.18097	0.277	0.024	0	2	GNG2
0	1.15696	0.793	0.455	0	2	CALM1
0	1.11924	0.506	0.149	0	2	FXYD5
0	1.08835	0.259	0.042	0	2	TNFRSF1B
0	1.08017	0.432	0.104	0	2	IFITM1
0	1.01193	0.277	0.04	0	2	EVI2B
0	-2.69676	0.471	0.756	0	2	KLK2
0	-2.87433	0.243	0.678	0	2	H2AFJ
0	-3.01755	0.183	0.653	0	2	PDLIM5
0	-3.44195	0.111	0.709	0	2	CST3
0	-3.88333	0.593	0.841	0	2	KLK3
6.47e-304	1.38603	0.349	0.095	1.57e-299	2	RORA
3.95e-296	1.36041	0.4	0.127	9.61e-292	2	SYNE2
1.3e-285	1.20733	0.276	0.06	3.18e-281	2	CARD16
5.38e-282	-3.11745	0.128	0.552	1.31e-277	2	TFF3
3.42e-276	1.79765	0.727	0.466	8.32e-272	2	HSPD1
8.53e-276	1.48255	0.487	0.208	2.07e-271	2	RNF213
9.32e-273	-2.28771	0.109	0.53	2.27e-268	2	NUPR1
8.15e-271	1.5146	0.452	0.18	1.98e-266	2	SMCHD1
2.95e-268	-1.98264	0.118	0.541	7.18e-264	2	CD9
3.02e-266	1.30732	0.405	0.144	7.36e-262	2	CDC42SE2
2.84e-264	1.33169	0.486	0.204	6.91e-260	2	AKAP13
6.73e-263	1.24181	0.612	0.327	1.64e-258	2	DDX24
6.83e-250	1.19231	0.287	0.075	1.66e-245	2	RESF1
2.61e-240	1.55047	0.817	0.594	6.36e-236	2	HSPE1
7.76e-240	1.15588	0.732	0.466	1.89e-235	2	SARAF
4.51e-238	1.25091	0.851	0.591	1.1e-233	2	HSPA8
1.28e-237	-1.4264	0.923	0.927	3.11e-233	2	FTL
9.21e-234	-2.68516	0.039	0.426	2.24e-229	2	LINC01088
1.16e-231	-2.52349	0.196	0.55	2.83e-227	2	TRGC1
1.51e-229	-1.72255	0.148	0.532	3.66e-225	2	PTMS
1.52e-229	1.00598	0.351	0.107	3.7e-225	2	CYTOR
1.23e-228	1.62015	0.603	0.32	2.99e-224	2	ID2
5.52e-226	-2.32663	0.084	0.456	1.34e-221	2	TSPAN1
1.34e-223	1.44612	0.351	0.124	3.26e-219	2	PIK3R1
1.34e-220	-2.45723	0.06	0.428	3.26e-216	2	PCA3
2.12e-218	1.49508	0.715	0.482	5.16e-214	2	DNAJA1
8.51e-216	1.27937	0.622	0.369	2.07e-211	2	DNAJB6
1.47e-213	1.3814	0.374	0.142	3.59e-209	2	NR3C1
6.91e-213	1.09853	0.255	0.065	1.68e-208	2	PRDM1
9.58e-213	1.46791	0.413	0.179	2.33e-208	2	CNOT6L
9.3e-211	1.16889	0.392	0.159	2.26e-206	2	FNBP1
1.2e-210	-2.04202	0.114	0.468	2.93e-206	2	KRT18
2.52e-208	1.17451	0.367	0.135	6.13e-204	2	CCNH
2.03e-207	1.22703	0.346	0.126	4.94e-203	2	EML4
1.21e-206	-1.96569	0.105	0.474	2.96e-202	2	TSC22D1
6.35e-205	1.064	0.394	0.148	1.54e-200	2	COTL1
9.34e-204	-1.49788	0.371	0.645	2.27e-199	2	NME2
3.74e-202	1.22454	0.728	0.441	9.09e-198	2	KLF6
3.44e-201	1.21122	0.483	0.229	8.36e-197	2	HMGB2
9.46e-201	-2.12103	0.035	0.382	2.3e-196	2	FOLH1
1.5e-197	1.03398	0.277	0.084	3.65e-193	2	SEPTIN6
6.19e-197	-1.97332	0.062	0.407	1.51e-192	2	MESP1
2.67e-196	-1.94658	0.296	0.589	6.5e-192	2	MPC2
9.91e-196	-1.92587	0.046	0.393	2.41e-191	2	MGST1
6.19e-195	-2.07325	0.117	0.462	1.51e-190	2	FXYD3
1.45e-192	1.05728	0.348	0.129	3.53e-188	2	SP100
7.5e-192	1.05302	0.299	0.099	1.82e-187	2	CCND3
8.28e-192	-2.09921	0.158	0.49	2.01e-187	2	RDH11
3.38e-190	1.24358	0.417	0.184	8.23e-186	2	REL
2.69e-189	1.40234	0.479	0.228	6.55e-185	2	RGS2
4.29e-189	1.34171	0.435	0.201	1.04e-184	2	TSPYL2
8.31e-189	1.15351	0.335	0.127	2.02e-184	2	EMB
3.89e-188	-1.80284	0.081	0.421	9.46e-184	2	KRT8
2.06e-187	-1.6236	0.336	0.636	5.02e-183	2	CD63
2.55e-187	-1.61894	0.27	0.577	6.19e-183	2	DSTN
2.25e-186	1.11108	0.564	0.274	5.47e-182	2	ANXA1
1.5e-185	1.23924	0.422	0.196	3.66e-181	2	IDS
7.17e-185	2.22831	0.722	0.521	1.74e-180	2	MT1X
1.17e-182	-1.92607	0.205	0.531	2.84e-178	2	SMS
1.96e-182	1.42411	0.522	0.302	4.78e-178	2	YPEL5
1.29e-181	-1.84884	0.036	0.363	3.13e-177	2	PART1
1.59e-181	-2.53496	0.26	0.538	3.87e-177	2	SPON2
3.71e-180	-2.16438	0.077	0.408	9.03e-176	2	GDF15
5.92e-180	-1.39967	0.088	0.434	1.44e-175	2	BEX3
9.33e-180	1.13452	0.336	0.13	2.27e-175	2	SMAP2
1.08e-178	-1.58771	0.042	0.372	2.64e-174	2	IGFBP2
2.86e-178	-1.90028	0.057	0.379	6.96e-174	2	STEAP2
1.04e-175	1.16948	0.442	0.21	2.53e-171	2	HIST1H4C
1.47e-175	-2.28289	0.022	0.336	3.57e-171	2	CCN1
2.82e-175	1.09728	0.891	0.7	6.86e-171	2	HSP90AB1
6.55e-175	-1.51186	0.035	0.357	1.59e-170	2	KLF4
7.74e-175	-1.17315	0.703	0.812	1.88e-170	2	SAT1
2.46e-174	1.2983	0.337	0.135	5.98e-170	2	RNF19A
5.57e-173	1.05808	0.275	0.091	1.36e-168	2	AC092338.3
3.48e-172	-1.46154	0.064	0.391	8.48e-168	2	SOX4
2.95e-171	-1.12241	0.022	0.336	7.19e-167	2	RAB13
4.15e-171	1.03075	0.348	0.141	1.01e-166	2	SLC38A1
5.86e-169	-1.73722	0.033	0.344	1.43e-164	2	HES1
3.5e-168	2.1141	0.377	0.162	8.52e-164	2	MT1F
5.58e-168	-1.71432	0.041	0.351	1.36e-163	2	GOLM1
5.66e-168	-1.74443	0.07	0.385	1.38e-163	2	TMPRSS2
3.29e-167	1.45732	0.511	0.28	8.02e-163	2	DDIT4
4.56e-167	1.28323	0.439	0.229	1.11e-162	2	PPP1R2
1.8e-165	-1.76689	0.034	0.34	4.38e-161	2	TRPM8
7.39e-164	-1.11756	0.021	0.325	1.8e-159	2	NFIB
3.35e-163	-1.39445	0.046	0.361	8.15e-159	2	SELENOP
2.17e-161	-1.851	0.087	0.399	5.28e-157	2	AZGP1
3.24e-160	1.11	0.385	0.173	7.89e-156	2	CKLF
3.7e-160	-2.2031	0.034	0.33	9.01e-156	2	MIPEP
1.37e-159	-1.49626	0.087	0.399	3.35e-155	2	SPINT2
1.66e-159	-1.21004	0.023	0.32	4.05e-155	2	BCAM
1.41e-158	-1.73519	0.045	0.346	3.44e-154	2	ABCC4
4.86e-158	-1.62977	0.216	0.528	1.18e-153	2	EGR1
3.62e-157	-1.70615	0.089	0.391	8.8e-153	2	TRPM4
2.59e-154	-1.71919	0.074	0.369	6.31e-150	2	NKX3-1
2.48e-153	-1.41387	0.168	0.47	6.04e-149	2	APLP2
5.8e-153	-1.28524	0.044	0.341	1.41e-148	2	TSPAN13
3.85e-152	-1.54334	0.066	0.363	9.38e-148	2	APP
1.38e-151	-1.37192	0.039	0.33	3.35e-147	2	NEDD4L
4.14e-151	-1.24553	0.074	0.375	1.01e-146	2	NPDC1
1.09e-150	-1.35015	0.035	0.324	2.66e-146	2	SPDEF
1.25e-150	-1.16414	0.049	0.35	3.05e-146	2	TCEAL9
1.17e-149	-1.50218	0.059	0.354	2.85e-145	2	PLPP1
5.65e-149	-1.20259	0.057	0.355	1.37e-144	2	SMIM14
2.69e-148	-1.54472	0.066	0.356	6.53e-144	2	SORD
6.11e-148	-1.56549	0.056	0.344	1.49e-143	2	SLC45A3
4.19e-147	1.10787	0.408	0.211	1.02e-142	2	LCP1
7.96e-146	-1.23907	0.03	0.312	1.94e-141	2	MLPH
1.14e-145	-1.33624	0.021	0.297	2.79e-141	2	CRNDE
3.8e-145	1.11301	0.268	0.099	9.24e-141	2	CEMIP2
7.46e-145	-1.16406	0.021	0.297	1.81e-140	2	H1F0
2.25e-143	-1.44243	0.105	0.406	5.46e-139	2	CYB5A
3.96e-143	-1.40036	0.017	0.286	9.64e-139	2	SPOCK1
2.08e-141	1.10628	0.402	0.207	5.06e-137	2	ZC3HAV1
1.56e-140	-1.3207	0.098	0.395	3.8e-136	2	ASAH1
1.49e-139	-1.38653	0.062	0.347	3.63e-135	2	CCNG2
1.01e-138	-1.51653	0.034	0.303	2.47e-134	2	OR51E2
1.03e-137	-2.94721	0.28	0.533	2.51e-133	2	MSMB
1.36e-137	-1.14884	0.044	0.324	3.32e-133	2	TPM1
1.98e-137	-1.23306	0.03	0.299	4.81e-133	2	FOXA1
8.63e-137	-1.161	0.097	0.394	2.1e-132	2	GNG10
1.09e-136	-1.44019	0.03	0.297	2.66e-132	2	RAMP1
5.93e-136	-1.48592	0.061	0.34	1.44e-131	2	TACSTD2
2.82e-134	-1.38995	0.058	0.33	6.85e-130	2	MCCC2
4.16e-134	-1.24485	0.067	0.351	1.01e-129	2	YBX3
5.87e-132	-1.05132	0.061	0.339	1.43e-127	2	NME4
1.36e-131	-1.2468	0.221	0.51	3.32e-127	2	YWHAE
1.82e-130	-1.86084	0.031	0.287	4.43e-126	2	CALD1
2.26e-130	-1.36246	0.059	0.328	5.49e-126	2	LRRC26
3.11e-130	-1.21658	0.02	0.275	7.57e-126	2	SLC9A3R2
5.58e-130	-1.2015	0.102	0.391	1.36e-125	2	GLO1
8.02e-130	-3.2839	0.058	0.31	1.95e-125	2	MGP
9.76e-130	-1.3417	0.009	0.255	2.38e-125	2	INSR
1.14e-129	-1.25759	0.056	0.322	2.79e-125	2	SNHG19
9.49e-129	-1.11204	0.586	0.707	2.31e-124	2	SNHG29
1.31e-128	1.25812	0.378	0.196	3.19e-124	2	CHORDC1
3.42e-128	-1.28555	0.095	0.37	8.32e-124	2	TMEM141
7.03e-128	-1.22595	0.044	0.307	1.71e-123	2	ALDH1A3
1.54e-127	-1.1426	0.023	0.275	3.76e-123	2	BASP1
1.7e-127	-1.8641	0.114	0.385	4.14e-123	2	ACPP
1.15e-126	-1.52795	0.446	0.643	2.79e-122	2	DBI
2.07e-126	-1.23402	0.044	0.305	5.03e-122	2	ZG16B
8.28e-126	-1.06964	0.023	0.271	2.02e-121	2	MDK
1.34e-125	-1.54468	0.052	0.308	3.27e-121	2	CPE
1.71e-124	-1.27736	0.076	0.341	4.15e-120	2	SLC39A6
1.05e-123	-3.14409	0.06	0.309	2.55e-119	2	CLU
3.47e-123	-1.95158	0.059	0.308	8.45e-119	2	AGR2
7.84e-122	-1.37666	0.127	0.387	1.91e-117	2	HEBP2
5.06e-121	-1.10295	0.12	0.407	1.23e-116	2	HSBP1
1.49e-120	-1.00728	0.028	0.272	3.62e-116	2	MAOA
1.49e-120	-1.56476	0.129	0.404	3.63e-116	2	CD59
3.19e-120	1.35658	0.832	0.728	7.76e-116	2	MT2A
7.33e-119	-1.03612	0.036	0.284	1.78e-114	2	UGDH
1.66e-118	-1.17065	0.065	0.323	4.04e-114	2	TRIB1
1.7e-117	1.0752	0.475	0.307	4.14e-113	2	FAM177A1
3.11e-116	-1.12879	0.036	0.279	7.56e-112	2	HSD17B4
4e-116	-1.08011	0.041	0.286	9.74e-112	2	CKB
1.12e-115	-1.05814	0.029	0.265	2.72e-111	2	SLC4A4
2.12e-115	1.00258	0.497	0.325	5.17e-111	2	EZR
4.57e-115	-1.04263	0.03	0.268	1.11e-110	2	STEAP1
5.78e-114	-1.0877	0.037	0.276	1.41e-109	2	SCD
1.16e-113	-1.20774	0.04	0.279	2.82e-109	2	NUDT8
2.33e-113	-1.076	0.117	0.385	5.67e-109	2	ADI1
3.17e-113	-1.16135	0.166	0.437	7.71e-109	2	KDELR2
4.15e-113	-1.36176	0.039	0.276	1.01e-108	2	SYCE1L
1.14e-112	-1.2507	0.64	0.699	2.78e-108	2	MIF
2.79e-112	-1.24066	0.317	0.537	6.8e-108	2	PEBP1
3.01e-112	1.28312	0.28	0.121	7.33e-108	2	PMAIP1
4.9e-112	1.08251	0.44	0.275	1.19e-107	2	GPBP1
1.34e-111	-1.3171	0.027	0.254	3.26e-107	2	TMSB15A
1.45e-111	-1.16176	0.764	0.731	3.53e-107	2	NEAT1
5.44e-111	-1.39198	0.228	0.492	1.32e-106	2	PSAP
3.66e-108	-1.00413	0.074	0.324	8.9e-104	2	ACSL3
1.63e-107	2.27357	0.389	0.214	3.97e-103	2	HSPA6
2.57e-106	-1.20246	0.123	0.368	6.25e-102	2	PMEPA1
3.31e-106	-2.27645	0.061	0.286	8.06e-102	2	TM4SF1
9.06e-105	-1.37863	0.05	0.277	2.2e-100	2	LINC00662
1.78e-103	1.10637	0.402	0.222	4.33e-99	2	AC020916.1
2.2e-103	-1.08569	0.062	0.296	5.36e-99	2	CLDN3
5.5e-103	-1.10879	0.068	0.306	1.34e-98	2	XAB2
1.68e-102	-1.2766	0.076	0.309	4.09e-98	2	KLK4
4.23e-102	1.53329	0.706	0.574	1.03e-97	2	HSPA1B
2.89e-101	-1.14564	0.196	0.434	7.03e-97	2	P4HB
2.11e-100	-1.06782	0.176	0.422	5.14e-96	2	MARCKSL1
3.02e-100	-1.36354	0.237	0.467	7.34e-96	2	DCXR
3.14e-100	-1.13944	0.194	0.443	7.65e-96	2	RHOB
4.39e-98	1.02357	0.39	0.237	1.07e-93	2	AHSA1
1.96e-97	-1.17472	0.41	0.585	4.76e-93	2	UQCRQ
2.16e-97	-1.83151	0.076	0.295	5.27e-93	2	IFITM3
3.31e-97	-1.33442	0.339	0.571	8.06e-93	2	TXN
5.21e-97	-1.00213	0.17	0.416	1.27e-92	2	CANX
1.64e-91	-1.14917	0.403	0.58	4e-87	2	SNHG8
2.75e-88	-1.0096	0.084	0.301	6.69e-84	2	PLPP5
1.04e-87	-1.00697	0.222	0.469	2.52e-83	2	LAPTM4A
1.77e-87	1.08523	0.272	0.134	4.3e-83	2	MAF
2.3e-86	-1.0855	0.13	0.363	5.6e-82	2	FAM162A
3.64e-85	-1.07648	0.149	0.367	8.85e-81	2	PPP3CA
1.16e-84	-1.02004	0.337	0.532	2.82e-80	2	RAC1
2.69e-82	-1.16011	0.197	0.439	6.55e-78	2	ANXA5
4.84e-82	-1.19402	0.091	0.298	1.18e-77	2	AMACR
5.79e-82	1.94613	0.535	0.402	1.41e-77	2	MT1E
4.79e-81	-1.00737	0.244	0.46	1.16e-76	2	TMED2
7.08e-81	-1.11223	0.165	0.398	1.72e-76	2	NPC2
2.49e-79	-1.05047	0.111	0.325	6.06e-75	2	CLDN4
1.23e-74	-1.01016	0.334	0.505	2.98e-70	2	HSP90B1
4.48e-72	-1.05264	0.222	0.432	1.09e-67	2	ATF3
6.05e-64	1.0379	0.421	0.306	1.47e-59	2	MRPL18
1.95e-62	1.21392	0.408	0.28	4.74e-58	2	ZFAND2A
1.17e-52	-2.01248	0.11	0.264	2.85e-48	2	PLA2G2A
2.55e-35	-1.51616	0.233	0.382	6.21e-31	2	SOD2
1.98e-33	-1.03127	0.34	0.456	4.81e-29	2	DHRS7
4.9e-19	-1.02039	0.225	0.324	1.19e-14	2	FABP5
0	3.18324	0.98	0.021	0	3	OGN
0	2.96997	0.993	0.09	0	3	KLK11
0	2.70989	0.993	0.158	0	3	IGF1
0	2.11442	0.896	0.073	0	3	KLK12
0	1.92392	0.986	0.223	0	3	SNHG14
0	1.8616	0.809	0.01	0	3	SERPINB11
0	1.84495	0.994	0.331	0	3	SNRPN
0	1.82902	0.956	0.189	0	3	USP22
0	1.80319	0.91	0.197	0	3	DARS
0	1.78576	0.853	0.046	0	3	RDH10
0	1.57915	0.965	0.206	0	3	HES4
0	1.53522	0.966	0.119	0	3	SMIM22
0	1.48126	1	0.669	0	3	MIF
0	1.44444	0.932	0.11	0	3	BANK1
0	1.43916	0.958	0.201	0	3	NUCB2
0	1.42136	0.997	0.479	0	3	SPON2
0	1.40954	0.986	0.318	0	3	HEBP2
0	1.3729	0.967	0.196	0	3	MAOA
0	1.35616	0.876	0.034	0	3	KCNN2
0	1.34811	0.933	0.145	0	3	HIST3H2A
0	1.33851	0.941	0.176	0	3	SOCS2
0	1.31612	0.986	0.298	0	3	TMEM141
0	1.31463	0.782	0.05	0	3	F3
0	1.31425	0.99	0.314	0	3	AMD1
0	1.3041	0.95	0.196	0	3	MDK
0	1.29969	0.931	0.254	0	3	TRIB1
0	1.29071	0.983	0.299	0	3	PPP3CA
0	1.25803	0.904	0.147	0	3	ALKBH5
0	1.25743	0.856	0.096	0	3	GMNN
0	1.213	0.928	0.14	0	3	BMPR1B
0	1.21284	0.975	0.248	0	3	SNHG19
0	1.19579	0.971	0.318	0	3	SOX4
0	1.18715	0.835	0.059	0	3	CD276
0	1.16828	0.905	0.113	0	3	CDK19
0	1.1444	0.974	0.3	0	3	PMEPA1
0	1.1416	0.947	0.194	0	3	UBE3A
0	1.13965	0.998	0.866	0	3	RPL7A
0	1.13742	0.958	0.231	0	3	GRINA
0	1.13163	0.99	0.459	0	3	NUPR1
0	1.13049	0.998	0.687	0	3	GAPDH
0	1.12398	1	0.929	0	3	RPL37A
0	1.11606	1	0.931	0	3	RPL8
0	1.07263	0.776	0.082	0	3	APCDD1
0	1.07233	0.918	0.209	0	3	NUDT8
0	1.07056	0.918	0.172	0	3	NBL1
0	1.05259	0.856	0.142	0	3	MAP2K3
0	1.0525	0.9	0.206	0	3	FOXO3
0	1.0366	0.842	0.066	0	3	ST8SIA6-AS1
0	1.01997	0.924	0.216	0	3	CCND1
0	1.01834	0.955	0.221	0	3	C19orf48
0	1.01458	0.773	0.077	0	3	PCAT18
0	1.01205	0.522	0.026	0	3	CYP4F2
0	1.01188	0.891	0.181	0	3	HIST1H1C
0	1.00861	0.989	0.419	0	3	NDUFB4
0	1.00693	0.999	0.933	0	3	RPS2
0	1.00069	0.964	0.281	0	3	PLPP1
0	1.00066	0.983	0.371	0	3	DDT
0	-1.15636	0.999	0.963	0	3	RPL26
0	-2.63707	0.076	0.527	0	3	RPS4Y1
4.22e-297	-1.25918	0.558	0.155	1.03e-292	3	CXCR4
5.42e-273	-3.52765	0.033	0.451	1.32e-268	3	S100A6
4.32e-255	-2.9387	0.041	0.439	1.05e-250	3	HLA-A
2.53e-217	-3.09392	0.027	0.386	6.15e-213	3	VIM
6.06e-184	-3.16248	0.144	0.438	1.47e-179	3	HLA-B
1.55e-178	-2.62213	0.008	0.319	3.78e-174	3	ANXA1
6.18e-175	-3.24466	0.96	0.737	1.5e-170	3	B2M
2.53e-166	-4.14834	0.331	0.529	6.16e-162	3	MSMB
4.87e-161	-1.36598	0.012	0.3	1.18e-156	3	SH3BGRL
1.24e-158	-2.60908	0.131	0.405	3.03e-154	3	S100A10
4.72e-133	-2.43593	0.005	0.252	1.15e-128	3	ADIRF
4.04e-132	-1.8143	0.008	0.255	9.82e-128	3	LGALS3
1.55e-130	-2.47632	0.024	0.272	3.77e-126	3	SRGN
1.81e-129	-1.79231	0.011	0.255	4.4e-125	3	GSTP1
4.13e-126	-3.62996	0.067	0.309	1e-121	3	MGP
1.14e-120	-2.28652	0.566	0.576	2.77e-116	3	S100A11
2.29e-120	-2.83875	0.036	0.27	5.56e-116	3	PLA2G2A
3.54e-114	-3.2461	0.058	0.285	8.61e-110	3	CD74
1.61e-111	-3.58218	0.084	0.307	3.93e-107	3	CLU
4.05e-108	-2.15777	0.035	0.251	9.86e-104	3	LGALS1
6.29e-95	-1.20604	0.779	0.383	1.53e-90	3	MT1E
9.02e-91	-1.98636	0.089	0.283	2.2e-86	3	CALD1
1.51e-84	-1.07503	0.685	0.307	3.68e-80	3	ANXA2
5.07e-77	-2.57662	0.113	0.282	1.23e-72	3	TM4SF1
9.36e-77	-1.76822	0.714	0.343	2.28e-72	3	SOD2
7.31e-74	-2.18371	0.142	0.301	1.78e-69	3	AGR2
6.61e-70	-1.10307	1	0.921	1.61e-65	3	FTH1
3.32e-68	-1.64156	0.457	0.215	8.08e-64	3	HMGA1
4.22e-67	-3.28886	0.561	0.517	1.03e-62	3	TFF3
4.65e-59	-1.01279	0.767	0.396	1.13e-54	3	GADD45B
2.07e-55	-2.45236	0.507	0.48	5.03e-51	3	HLA-C
3e-49	-1.01694	0.526	0.266	7.3e-45	3	ATP1B3
9.51e-46	-1.21806	0.682	0.347	2.31e-41	3	TSC22D3
2.41e-45	-1.02749	0.599	0.312	5.87e-41	3	ZFP36L2
1.37e-43	-1.11562	0.587	0.303	3.33e-39	3	SBDS
1.99e-41	-1.05626	0.724	0.356	4.85e-37	3	CYB5A
5.71e-40	-1.52769	0.856	0.511	1.39e-35	3	MT1X
9.68e-39	-2.10582	0.945	0.642	2.35e-34	3	CST3
9.94e-36	-2.04219	0.79	0.551	2.42e-31	3	ITM2B
1.08e-34	-1.05921	0.659	0.348	2.62e-30	3	LMNA
4.38e-30	-1.0379	0.548	0.299	1.07e-25	3	SELENOM
6.28e-29	-1.045	0.407	0.224	1.53e-24	3	TMSB15A
2.53e-28	-1.71484	0.238	0.293	6.16e-24	3	CPE
4.97e-26	-1.97776	0.316	0.344	1.21e-21	3	HLA-E
1.39e-24	-1.14942	0.732	0.396	3.38e-20	3	ANXA5
5.3e-24	-1.02357	0.728	0.382	1.29e-19	3	CSTB
3e-21	-1.00326	0.852	0.451	7.31e-17	3	CALM1
1.04e-19	-2.3568	0.93	0.72	2.54e-15	3	MT2A
3.83e-18	-1.61687	0.934	0.612	9.31e-14	3	BTG1
4.06e-14	-1.05112	0.78	0.444	9.88e-10	3	SRSF7
1.13e-13	-1.91158	0.674	0.375	2.76e-09	3	LINC01088
1.39e-13	-2.11818	0.26	0.28	3.37e-09	3	IFITM3
6.85e-11	-1.38366	0.288	0.185	1.67e-06	3	ID1
1.73e-09	-1.08309	0.669	0.387	4.21e-05	3	CD99
1.07e-07	-1.17456	0.77	0.444	0.00259207	3	PNRC1
1.36e-07	-1.24243	0.918	0.605	0.00331664	3	DBI
1.51e-07	-1.86801	0.47	0.3	0.00368377	3	CCN1
6.31e-07	-1.01956	0.944	0.564	0.0153456	3	ATP5MG
0	2.11226	0.974	0.216	0	4	LINC00662
0	1.8271	1	0.811	0	4	KLK3
0	1.68341	0.968	0.277	0	4	TRPM8
0	1.68166	1	0.484	0	4	MSMB
0	1.65955	0.862	0.107	0	4	DSCAM-AS1
0	1.65162	0.981	0.317	0	4	FOLH1
0	1.64834	0.976	0.317	0	4	STEAP2
0	1.61682	0.96	0.284	0	4	ABCC4
0	1.60963	0.999	0.487	0	4	SPON2
0	1.6058	0.9	0.07	0	4	FGF12
0	1.56788	0.975	0.364	0	4	PCA3
0	1.5293	0.92	0.225	0	4	SPOCK1
0	1.52563	0.615	0.027	0	4	HPSE2
0	1.49121	0.987	0.433	0	4	RDH11
0	1.45709	0.995	0.594	0	4	PDLIM5
0	1.43867	0.96	0.347	0	4	GDF15
0	1.43399	0.835	0.088	0	4	PRKAA2
0	1.42432	0.94	0.242	0	4	OR51E2
0	1.42138	0.997	0.491	0	4	TFF3
0	1.4166	0.883	0.113	0	4	ARLNC1
0	1.40234	0.817	0.086	0	4	CLGN
0	1.39352	0.815	0.123	0	4	TSPAN8
0	1.38914	0.949	0.289	0	4	GOLM1
0	1.38435	0.979	0.394	0	4	TSPAN1
0	1.3114	0.894	0.207	0	4	SLC4A4
0	1.29557	0.862	0.175	0	4	CREB3L1
0	1.28547	0.914	0.312	0	4	NKX3-1
0	1.28474	0.925	0.312	0	4	IGFBP2
0	1.27885	0.953	0.393	0	4	FOXP1
0	1.27846	0.875	0.193	0	4	ENTPD5
0	1.27279	0.816	0.094	0	4	CACNA1D
0	1.27247	0.999	0.624	0	4	H2AFJ
0	1.26939	0.854	0.113	0	4	MYBPC1
0	1.2628	0.979	0.361	0	4	LINC01088
0	1.25568	0.969	0.324	0	4	TMPRSS2
0	1.24457	0.802	0.051	0	4	MS4A8
0	1.24136	0.959	0.283	0	4	SLC45A3
0	1.2095	0.751	0.04	0	4	LINC01341
0	1.20906	0.956	0.248	0	4	AGR2
0	1.19493	0.771	0.119	0	4	AC021148.2
0	1.19048	0.909	0.29	0	4	CCNG2
0	1.18284	0.934	0.338	0	4	ASAH1
0	1.17292	0.673	0.131	0	4	MIR29B2CHG
0	1.16107	0.87	0.208	0	4	MIA3
0	1.15998	0.868	0.214	0	4	ARHGEF26
0	1.1563	0.99	0.494	0	4	TRGC1
0	1.15339	0.747	0.06	0	4	PCAT14
0	1.14924	0.968	0.267	0	4	MIPEP
0	1.12437	0.94	0.28	0	4	TACSTD2
0	1.11971	0.919	0.344	0	4	NUDT4
0	1.1187	0.866	0.24	0	4	CRNDE
0	1.11676	0.843	0.22	0	4	BASP1
0	1.1112	0.809	0.173	0	4	ELK4
0	1.10773	0.71	0.019	0	4	LINC02767
0	1.10753	0.817	0.157	0	4	GPR160
0	1.10524	0.816	0.203	0	4	IRS2
0	1.09992	0.952	0.416	0	4	APLP2
0	1.09245	0.651	0.062	0	4	LINC01297
0	1.08102	0.764	0.209	0	4	ELF3
0	1.06612	0.966	0.542	0	4	MPC2
0	1.06026	0.868	0.198	0	4	TMSB15A
0	1.05719	0.89	0.22	0	4	SYCE1L
0	1.0428	0.79	0.116	0	4	CLDN8
0	1.0411	0.717	0.049	0	4	TMEM45B
0	1.03745	0.632	0.057	0	4	PCGEM1
0	1.02269	0.677	0.062	0	4	AL158206.1
0	1.0215	0.895	0.272	0	4	NEDD4L
0	1.01636	0.887	0.284	0	4	TSPAN13
0	-1.46146	0.535	0.074	0	4	TPSB2
3.84e-150	-1.00971	0.424	0.137	9.35e-146	4	SPRY1
2e-143	-1.08479	0.96	0.829	4.87e-139	4	EIF1
4.54e-137	-1.22305	0.604	0.231	1.11e-132	4	PLA2G2A
4.62e-135	-2.28448	0.056	0.359	1.13e-130	4	HLA-E
2.15e-133	-3.08195	0.897	0.744	5.22e-129	4	B2M
5.41e-124	-2.08737	0.067	0.352	1.32e-119	4	ANXA2
1.29e-115	-3.62574	0.036	0.307	3.13e-111	4	MGP
5.22e-104	-1.75002	0.906	0.71	1.27e-99	4	TMSB10
4.02e-100	-2.89794	0.143	0.373	9.79e-96	4	VIM
1.31e-99	-3.17587	0.232	0.431	3.18e-95	4	S100A6
4.01e-99	-1.14077	0.458	0.175	9.76e-95	4	SOD3
1.57e-97	-2.62922	0.044	0.283	3.82e-93	4	TM4SF1
2.89e-95	-2.9549	0.235	0.427	7.04e-91	4	HLA-B
6.81e-75	-2.8976	0.847	0.729	1.66e-70	4	MT2A
1.9e-51	-2.20005	0.134	0.288	4.62e-47	4	IFITM3
8.17e-40	-1.23472	0.495	0.254	1.99e-35	4	CALD1
2.55e-38	-2.33014	0.191	0.302	6.2e-34	4	ANXA1
2.1e-35	-1.64637	0.346	0.401	5.1e-31	4	LDHA
6.18e-34	-1.5112	0.402	0.223	1.5e-29	4	HMGA1
8.8e-34	-1.13606	0.989	0.824	2.14e-29	4	TMSB4X
5.45e-32	-1.99724	0.296	0.152	1.33e-27	4	APOE
1.34e-31	-2.27329	0.159	0.259	3.25e-27	4	SRGN
6.22e-30	-1.28598	0.188	0.291	1.51e-25	4	ATP1B3
7.48e-29	-1.09156	0.991	0.923	1.82e-24	4	FTL
6.84e-27	-1.00297	0.99	0.923	1.67e-22	4	FTH1
4.78e-26	-2.19179	0.355	0.386	1.16e-21	4	S100A10
2.1e-24	-2.16133	0.382	0.217	5.12e-20	4	MT1G
1.46e-23	-3.0071	0.198	0.272	3.55e-19	4	CD74
9.2e-22	-2.28625	0.435	0.408	2.24e-17	4	HLA-A
5.68e-19	-1.09417	0.773	0.587	1.38e-14	4	EEF1B2
6.96e-18	-1.70493	0.399	0.224	1.69e-13	4	ADIRF
4.1e-16	-1.07733	0.577	0.36	9.98e-12	4	TSC22D3
2.25e-15	-1.05397	0.333	0.206	5.49e-11	4	CREM
1.59e-11	-1.05184	0.778	0.57	3.87e-07	4	YBX1
2.06e-10	-1.20633	0.318	0.324	5.01e-06	4	IRF1
1.98e-08	-1.16395	0.265	0.278	0.000480786	4	CEBPD
5e-08	-1.2784	0.632	0.411	0.00121578	4	GADD45B
1.93e-07	-1.37697	0.313	0.222	0.00470007	4	HSPA6
7.51e-07	-1.74314	0.632	0.474	0.0182723	4	NFKBIA
1.01e-06	-1.75698	0.626	0.474	0.0244976	4	HLA-C
1.7e-06	-2.20171	0.403	0.369	0.0412835	4	SOD2
4.6e-234	1.02633	0.899	0.833	1.12e-229	5	RPL14
8.34e-191	-2.92863	0.037	0.442	2.03e-186	5	S100A6
2.15e-172	-2.66569	0.368	0.758	5.23e-168	5	MT2A
1.34e-154	-1.57813	0.289	0.656	3.27e-150	5	BTG1
5.2e-151	-1.2953	0.201	0.59	1.27e-146	5	ITM2B
1.38e-149	-1.90446	0.068	0.43	3.37e-145	5	HLA-A
1.23e-147	-2.48875	0.036	0.378	2.98e-143	5	VIM
1.45e-125	-1.09752	0.289	0.667	3.54e-121	5	JUNB
1.99e-125	-1.66377	0.351	0.683	4.83e-121	5	CST3
6.77e-122	-1.68671	0.049	0.359	1.65e-117	5	HLA-E
3.73e-120	-1.32245	0.164	0.501	9.09e-116	5	HLA-C
6.01e-116	-1.23619	0.053	0.358	1.46e-111	5	APP
6.98e-112	-1.67705	0.542	0.766	1.7e-107	5	B2M
5.81e-110	-1.63901	0.13	0.433	1.41e-105	5	HLA-B
1.87e-109	-1.23624	0.092	0.401	4.56e-105	5	CD59
2.79e-108	-2.03403	0.033	0.312	6.79e-104	5	ANXA1
1.63e-106	-1.35688	0.065	0.358	3.95e-102	5	ID2
3.83e-100	-2.85927	0.045	0.306	9.31e-96	5	MGP
8e-100	-2.23018	0.016	0.267	1.95e-95	5	SRGN
2.07e-99	-1.3296	0.071	0.351	5.04e-95	5	ANXA2
3.86e-99	-1.27603	0.07	0.349	9.39e-95	5	ZFP36L2
1.33e-98	-2.8298	0.045	0.305	3.24e-94	5	CLU
1.89e-97	-1.60834	0.055	0.328	4.59e-93	5	CCN1
2.54e-95	1.70605	0.495	0.306	6.18e-91	5	FABP5
1.55e-94	-1.15957	0.192	0.494	3.76e-90	5	SH3BGRL3
1.84e-93	-1.65368	0.106	0.387	4.48e-89	5	SOD2
4.57e-93	-1.57044	0.012	0.25	1.11e-88	5	GSTP1
8.75e-91	-2.12033	0.25	0.554	2.13e-86	5	MT1X
4.28e-86	-2.64555	0.045	0.281	1.04e-81	5	CD74
1.86e-84	-1.13079	0.31	0.6	4.53e-80	5	HSPA1B
7.72e-84	-1.82194	0.153	0.428	1.88e-79	5	MT1E
1.82e-63	-1.44617	0.085	0.29	4.42e-59	5	IFITM3
8.03e-59	1.27497	0.421	0.295	1.95e-54	5	SNHG19
3.79e-55	1.12789	0.427	0.283	9.23e-51	5	KLK4
6.78e-51	-1.38995	0.136	0.318	1.65e-46	5	MIPEP
1.18e-38	1.0376	0.389	0.276	2.86e-34	5	AMACR
1.42e-23	-1.20417	0.162	0.276	3.46e-19	5	TM4SF1
2.51e-21	1.08337	0.327	0.258	6.11e-17	5	NUDT8
7.6e-17	1.10307	0.288	0.23	1.85e-12	5	HIST1H1C
0	5.08013	0.657	0.096	0	6	APOC1
0	4.99674	0.693	0.135	0	6	APOE
0	4.80481	0.971	0.184	0	6	HLA-DRA
0	4.66746	0.619	0.061	0	6	CCL3
0	4.33246	0.928	0.184	0	6	HLA-DPB1
0	4.27697	0.978	0.234	0	6	CD74
0	4.25768	0.556	0.017	0	6	IL1B
0	4.20248	0.799	0.027	0	6	LYZ
0	4.1982	0.917	0.137	0	6	HLA-DPA1
0	4.10454	0.943	0.065	0	6	TYROBP
0	4.06216	0.676	0.018	0	6	C1QB
0	4.04234	0.651	0.167	0	6	CXCL8
0	3.94402	0.689	0.02	0	6	C1QA
0	3.89418	0.509	0.031	0	6	CCL3L1
0	3.80175	0.913	0.15	0	6	HLA-DRB1
0	3.65001	0.814	0.062	0	6	IFI30
0	3.44213	0.844	0.015	0	6	AIF1
0	3.43492	0.623	0.009	0	6	C1QC
0	3.31705	0.871	0.056	0	6	FCER1G
0	3.30845	0.807	0.208	0	6	CTSB
0	3.28558	0.255	0.022	0	6	CCL20
0	3.28323	0.998	0.923	0	6	FTL
0	3.22695	0.263	0.021	0	6	SPP1
0	3.19736	0.761	0.035	0	6	HLA-DQA1
0	3.16266	0.777	0.049	0	6	HLA-DQB1
0	3.09435	0.741	0.01	0	6	MS4A6A
0	3.07426	0.453	0.043	0	6	CCL4L2
0	3.05943	0.522	0.076	0	6	CCL4
0	3.04405	0.73	0.307	0	6	CTSD
0	3.01352	0.503	0.029	0	6	GPNMB
0	2.95931	0.536	0.113	0	6	CXCL2
0	2.92622	0.516	0.078	0	6	G0S2
0	2.79113	0.902	0.356	0	6	NPC2
0	2.78238	0.704	0.009	0	6	MS4A7
0	2.76309	0.724	0.013	0	6	LST1
0	2.70886	0.769	0.074	0	6	HLA-DMA
0	2.7076	0.729	0.024	0	6	CD68
0	2.7035	0.393	0.051	0	6	CXCL3
0	2.68692	0.747	0.045	0	6	CTSS
0	2.64789	0.489	0.019	0	6	BCL2A1
0	2.63195	0.573	0.066	0	6	HLA-DRB5
0	2.57224	0.285	0.008	0	6	S100A9
0	2.55167	0.838	0.159	0	6	CYBA
0	2.49628	0.829	0.207	0	6	LGALS1
0	2.45761	0.863	0.453	0	6	PSAP
0	2.43962	0.629	0.07	0	6	PLAUR
0	2.42031	0.58	0.035	0	6	GPR183
0	2.40999	0.503	0.078	0	6	C15orf48
0	2.32887	0.677	0.031	0	6	HLA-DMB
0	2.30699	0.78	0.089	0	6	LAPTM5
0	2.27209	0.876	0.223	0	6	SRGN
0	2.19586	0.746	0.245	0	6	GRN
0	2.17383	0.612	0.007	0	6	FCGR2A
0	2.16081	0.614	0.006	0	6	IGSF6
0	2.13943	0.664	0.178	0	6	CTSZ
0	2.06967	0.718	0.111	0	6	RGS1
0	2.06295	0.635	0.105	0	6	CD83
0	2.05501	0.493	0.015	0	6	CD14
0	2.02905	0.662	0.198	0	6	MAFB
0	1.95224	0.603	0.008	0	6	RNASE6
0	1.94083	0.999	0.825	0	6	TMSB4X
0	1.93679	0.51	0.133	0	6	LGMN
0	1.93591	0.757	0.25	0	6	RNASET2
0	1.93363	0.586	0.053	0	6	CAPG
0	1.90936	0.487	0.009	0	6	C5AR1
0	1.905	0.56	0.082	0	6	PLIN2
0	1.89135	0.502	0.084	0	6	LIPA
0	1.89048	0.504	0.003	0	6	MS4A4A
0	1.87849	0.632	0.135	0	6	SGK1
0	1.85294	0.69	0.142	0	6	COTL1
0	1.83469	0.508	0.014	0	6	PLEK
0	1.82075	0.509	0.058	0	6	ALOX5AP
0	1.81522	0.437	0.009	0	6	FCGR3A
0	1.81033	0.497	0.026	0	6	PHACTR1
0	1.80197	0.615	0.031	0	6	ITGB2
0	1.79556	0.715	0.214	0	6	IER3
0	1.78617	0.579	0.182	0	6	CTSL
0	1.78581	0.419	0.022	0	6	HLA-DQA2
0	1.77351	0.487	0.005	0	6	CALHM6
0	1.76177	0.447	0.004	0	6	TREM2
0	1.76035	0.997	0.924	0	6	FTH1
0	1.75248	0.414	0.004	0	6	OLR1
0	1.74271	0.669	0.247	0	6	MARCKS
0	1.71622	0.496	0.011	0	6	TMEM176B
0	1.69875	0.452	0.01	0	6	GPR34
0	1.68904	0.354	0.049	0	6	SLC40A1
0	1.63097	0.518	0.006	0	6	CYBB
0	1.60473	0.563	0.033	0	6	LY96
0	1.59886	0.403	0.052	0	6	ACP5
0	1.59166	0.603	0.1	0	6	TYMP
0	1.58609	0.981	0.709	0	6	TMSB10
0	1.54359	0.557	0.008	0	6	SPI1
0	1.53703	0.637	0.176	0	6	CTSH
0	1.51694	0.663	0.17	0	6	S100A4
0	1.50948	0.6	0.052	0	6	FYB1
0	1.49794	0.503	0.02	0	6	FGL2
0	1.47815	0.655	0.152	0	6	RNF130
0	1.4752	0.658	0.188	0	6	FCGRT
0	1.47288	0.546	0.05	0	6	LSP1
0	1.45774	0.723	0.216	0	6	ARPC1B
0	1.45094	0.475	0.023	0	6	C1orf162
0	1.44943	0.554	0.073	0	6	CXCL16
0	1.43763	0.564	0.048	0	6	PYCARD
0	1.43254	0.273	0.017	0	6	TNF
0	1.42821	0.459	0.05	0	6	TNFAIP2
0	1.42709	0.449	0.003	0	6	MSR1
0	1.4269	0.506	0.123	0	6	IER5
0	1.42238	0.516	0.006	0	6	LY86
0	1.41457	0.556	0.067	0	6	KCTD12
0	1.41294	0.434	0.007	0	6	CPVL
0	1.40776	0.58	0.079	0	6	CTSC
0	1.39662	0.252	0.008	0	6	AC020656.1
0	1.37227	0.464	0.021	0	6	TGFBI
0	1.34792	0.33	0.002	0	6	SDS
0	1.34559	0.471	0.013	0	6	IL18
0	1.32569	0.506	0.107	0	6	DAB2
0	1.32254	0.455	0.003	0	6	LILRB4
0	1.30262	0.437	0.048	0	6	CFD
0	1.2943	0.464	0.048	0	6	OGFRL1
0	1.29169	0.512	0.044	0	6	RAB31
0	1.28992	0.453	0.002	0	6	CD86
0	1.28668	0.732	0.293	0	6	VAMP8
0	1.28596	0.494	0.055	0	6	AKR1B1
0	1.2732	0.996	0.742	0	6	B2M
0	1.26292	0.472	0.012	0	6	LAIR1
0	1.25865	0.376	0.042	0	6	SERPINB9
0	1.25204	0.593	0.125	0	6	FAM49B
0	1.24409	0.531	0.059	0	6	UCP2
0	1.23782	0.507	0.04	0	6	HCLS1
0	1.23489	0.57	0.066	0	6	CD53
0	1.23476	0.416	0.002	0	6	CSF1R
0	1.22574	0.349	0.002	0	6	VSIG4
0	1.21693	0.427	0.006	0	6	ITGAX
0	1.21418	0.422	0.002	0	6	CSF2RA
0	1.21137	0.251	0.014	0	6	LUCAT1
0	1.20422	0.61	0.103	0	6	GMFG
0	1.20223	0.562	0.116	0	6	AP1S2
0	1.20107	0.538	0.065	0	6	ZEB2
0	1.18692	0.362	0.003	0	6	MNDA
0	1.17845	0.349	0.002	0	6	CD163
0	1.17568	0.418	0.06	0	6	ARL4C
0	1.1748	0.589	0.075	0	6	CD37
0	1.16662	0.501	0.066	0	6	HCST
0	1.16169	0.343	0.012	0	6	CCRL2
0	1.15742	0.564	0.159	0	6	TPP1
0	1.1546	0.381	0.008	0	6	TMEM176A
0	1.14989	0.415	0.008	0	6	TNFSF13B
0	1.12982	0.428	0.033	0	6	LCP2
0	1.12718	0.422	0.054	0	6	PTPRE
0	1.1234	0.413	0.018	0	6	RASSF4
0	1.11909	0.387	0.008	0	6	C3AR1
0	1.11557	0.488	0.058	0	6	SAMHD1
0	1.09788	0.404	0.025	0	6	ADAP2
0	1.0961	0.512	0.125	0	6	MFSD1
0	1.07926	0.442	0.016	0	6	CD4
0	1.06425	0.47	0.091	0	6	GLRX
0	1.06329	0.418	0.082	0	6	CPM
0	1.06138	0.338	0.015	0	6	PLTP
0	1.05661	0.358	0.002	0	6	MPEG1
0	1.0563	0.536	0.055	0	6	GLIPR1
0	1.05483	0.409	0.003	0	6	CLEC7A
0	1.05457	0.302	0.006	0	6	OTOA
0	1.05385	0.478	0.037	0	6	EVI2B
0	1.04638	0.443	0.034	0	6	LGALS9
0	1.03682	0.382	0.027	0	6	STX11
0	1.03673	0.406	0.038	0	6	SNX10
0	1.03397	0.436	0.032	0	6	PLXDC2
0	1.03286	0.392	0.049	0	6	TNFSF13
0	1.03168	0.377	0.006	0	6	PILRA
0	1.02833	0.405	0.024	0	6	CD84
0	1.02334	0.659	0.153	0	6	FXYD5
0	1.0176	0.365	0.048	0	6	GM2A
0	1.01575	0.266	0.007	0	6	C3
0	1.01433	0.322	0.005	0	6	FCGR2B
0	1.01064	0.409	0.012	0	6	ADA2
0	1.00948	0.665	0.168	0	6	ARHGDIB
0	1.00753	0.307	0.042	0	6	PLA2G7
0	1.00601	0.285	0.016	0	6	PLAU
0	1.00246	0.386	0.064	0	6	MAP3K8
0	1.0013	0.332	0.005	0	6	SLCO2B1
0	1.00045	0.461	0.056	0	6	CD48
1.53e-307	1.20028	0.581	0.17	3.73e-303	6	CKLF
6.95e-300	1.53465	0.745	0.328	1.69e-295	6	LITAF
9.07e-290	1.01973	0.553	0.169	2.21e-285	6	MGAT1
3.07e-289	1.14062	0.5	0.143	7.47e-285	6	CREG1
1.28e-278	1.63962	0.723	0.32	3.11e-274	6	GLUL
3.96e-273	1.17207	0.536	0.17	9.63e-269	6	NINJ1
3.26e-271	2.1252	0.782	0.39	7.94e-267	6	CSTB
2.29e-268	1.08973	0.398	0.093	5.57e-264	6	ATP2B1-AS1
2.02e-266	1.16516	0.696	0.279	4.91e-262	6	RGS10
2.91e-266	1.42341	0.564	0.184	7.07e-262	6	REL
1.1e-263	1.48414	0.639	0.228	2.68e-259	6	RGS2
2.66e-260	1.06014	0.904	0.393	6.48e-256	6	HLA-B
3.97e-260	1.19872	0.596	0.214	9.66e-256	6	LIMS1
1.02e-258	1.56585	0.536	0.167	2.47e-254	6	TNFAIP3
3.95e-254	1.0129	0.426	0.099	9.61e-250	6	DUSP2
8.51e-248	2.02773	0.832	0.466	2.07e-243	6	NFKBIA
6.44e-242	1.28227	0.626	0.218	1.57e-237	6	LGALS3
6.88e-233	1.40938	0.734	0.323	1.67e-228	6	ID2
3.14e-224	1.30517	0.895	0.56	7.64e-220	6	S100A11
5.56e-224	1.41598	0.745	0.353	1.35e-219	6	SOD2
4.02e-221	1.31365	0.62	0.256	9.77e-217	6	CEBPB
1.79e-216	1.07772	0.817	0.337	4.37e-212	6	VIM
4.38e-211	1.10955	0.951	0.755	1.07e-206	6	ACTB
8.94e-209	1.81439	0.299	0.064	2.18e-204	6	AREG
1.89e-201	1.18792	0.728	0.378	4.59e-197	6	SDCBP
1.07e-197	1.17912	0.573	0.233	2.6e-193	6	CFLAR
1.23e-193	-3.23275	0.754	0.825	2.99e-189	6	KLK3
7.62e-175	1.13645	0.885	0.553	1.85e-170	6	ITM2B
6.16e-172	1.19893	0.465	0.183	1.5e-167	6	PLD3
1e-170	1.03537	0.701	0.357	2.44e-166	6	ASAH1
8.19e-170	1.12137	0.661	0.323	1.99e-165	6	BRI3
1.92e-152	1.13385	0.402	0.145	4.67e-148	6	NFKB1
2.51e-152	-2.57011	0.678	0.737	6.1e-148	6	KLK2
4.09e-144	1.21356	0.518	0.213	9.94e-140	6	HSPA6
2.47e-126	-2.53973	0.441	0.626	6.01e-122	6	PDLIM5
1.9e-116	1.12704	0.95	0.773	4.61e-112	6	HSP90AA1
5.62e-116	-2.57267	0.274	0.535	1.37e-111	6	TRGC1
2.07e-103	-2.36735	0.546	0.65	5.03e-99	6	H2AFJ
5.18e-98	-2.69154	0.31	0.527	1.26e-93	6	SPON2
3.07e-92	-2.60724	0.298	0.531	7.47e-88	6	TFF3
8e-86	-1.52128	0.085	0.36	1.95e-81	6	IGFBP2
3.93e-83	-2.00956	0.236	0.452	9.55e-79	6	KRT18
8.13e-83	-1.66576	0.424	0.56	1.98e-78	6	DSTN
1.22e-82	-2.12657	0.213	0.438	2.98e-78	6	TSPAN1
1.91e-82	-2.26845	0.148	0.409	4.66e-78	6	LINC01088
1.4e-81	-1.07005	0.052	0.314	3.41e-77	6	NFIB
3.42e-78	-2.16311	0.069	0.324	8.31e-74	6	CCN1
4.89e-76	-1.31168	0.124	0.363	1.19e-71	6	NPDC1
3e-74	-1.79058	0.184	0.406	7.3e-70	6	KRT8
3.24e-74	-1.85077	0.167	0.391	7.89e-70	6	MESP1
5.39e-74	-1.67242	0.108	0.349	1.31e-69	6	PART1
7.28e-73	-1.79029	0.135	0.366	1.77e-68	6	STEAP2
8.34e-73	-1.24721	0.031	0.267	2.03e-68	6	SLC9A3R2
1.68e-71	1.08666	0.52	0.305	4.1e-67	6	BAG3
3.81e-69	-1.84345	0.143	0.366	9.28e-65	6	FOLH1
7.92e-69	-2.11137	0.205	0.409	1.93e-64	6	PCA3
1.19e-68	-3.08435	0.071	0.301	2.89e-64	6	CLU
1.42e-68	-1.16702	0.076	0.309	3.46e-64	6	BCAM
8.03e-67	-1.52569	0.121	0.342	1.95e-62	6	PLPP1
9.26e-66	-1.68378	0.144	0.357	2.25e-61	6	NKX3-1
1.9e-64	-1.76291	0.169	0.385	4.62e-60	6	AZGP1
2.42e-64	-1.60095	0.159	0.371	5.89e-60	6	TMPRSS2
1.98e-63	-1.92114	0.263	0.445	4.81e-59	6	FXYD3
2.53e-63	-1.27259	0.109	0.329	6.15e-59	6	TSPAN13
1.16e-62	-1.22022	0.722	0.693	2.83e-58	6	MIF
2.23e-62	1.0537	0.794	0.574	5.42e-58	6	HSPA1B
3.22e-61	-1.53972	0.128	0.337	7.83e-57	6	GOLM1
1.21e-60	-1.20279	0.32	0.484	2.95e-56	6	C12orf57
5.31e-59	-3.13354	0.099	0.3	1.29e-54	6	MGP
1.76e-58	-1.18735	0.072	0.286	4.28e-54	6	CRNDE
3.31e-58	-1.11478	0.706	0.675	8.05e-54	6	GAS5
5.22e-58	-1.74794	0.071	0.278	1.27e-53	6	CALD1
3.05e-57	-1.42202	0.09	0.292	7.41e-53	6	OR51E2
4.81e-57	-1.5745	0.127	0.333	1.17e-52	6	ABCC4
5.19e-57	-1.27193	0.072	0.275	1.26e-52	6	SPOCK1
4.59e-56	-1.52056	0.136	0.331	1.12e-51	6	SLC45A3
4.74e-56	-1.51698	0.122	0.326	1.15e-51	6	TRPM8
3.02e-55	-2.04313	0.118	0.317	7.34e-51	6	MIPEP
8e-55	-1.02447	0.06	0.256	1.95e-50	6	SLC4A4
6.03e-54	-1.18923	0.097	0.296	1.47e-49	6	ALDH1A3
1.67e-53	-1.48612	0.102	0.297	4.08e-49	6	CPE
3.59e-53	-1.3104	0.124	0.317	8.73e-49	6	LRRC26
5.19e-53	-1.09735	0.092	0.287	1.26e-48	6	FOXA1
6.71e-53	-1.16885	0.116	0.311	1.63e-48	6	SPDEF
1.14e-51	-1.39715	0.135	0.327	2.78e-47	6	TACSTD2
2.3e-51	-1.1606	0.119	0.311	5.6e-47	6	SNHG19
2.53e-49	-1.84504	0.359	0.47	6.14e-45	6	RDH11
2.55e-49	-1.65106	0.219	0.375	6.2e-45	6	TRPM4
2.55e-48	-1.08123	0.103	0.288	6.22e-44	6	SNHG14
2.64e-48	-1.34366	0.191	0.357	6.43e-44	6	PMEPA1
1.08e-47	-1.17548	0.112	0.294	2.62e-43	6	ZG16B
3.31e-47	-1.10484	0.118	0.299	8.06e-43	6	MLPH
3.38e-47	-1.30358	0.159	0.329	8.23e-43	6	SLC39A6
9.71e-47	1.04229	0.393	0.219	2.36e-42	6	MT1G
2.04e-46	-1.48748	0.296	0.454	4.97e-42	6	TSC22D1
3.27e-46	-1.38183	0.178	0.342	7.96e-42	6	SORD
3.3e-46	-1.33176	0.533	0.568	8.02e-42	6	SNHG8
3.56e-46	-1.30985	0.141	0.318	8.66e-42	6	MCCC2
1.76e-44	-1.30181	0.088	0.267	4.29e-40	6	SYCE1L
2.09e-44	-1.23341	0.27	0.413	5.09e-40	6	PRDX2
3.63e-43	-2.77391	0.417	0.519	8.83e-39	6	MSMB
2.08e-42	-2.27771	0.115	0.277	5.07e-38	6	TM4SF1
4.15e-42	-1.14668	0.121	0.286	1.01e-37	6	CLDN3
7.23e-42	-1.18113	0.267	0.415	1.76e-37	6	BEX3
8.16e-42	-1.59431	0.575	0.566	1.99e-37	6	MPC2
1.02e-39	-1.8871	0.231	0.371	2.49e-35	6	ACPP
1.28e-39	-1.21739	0.118	0.285	3.11e-35	6	RAMP1
5.64e-39	-1.44706	0.231	0.373	1.37e-34	6	MGST1
4.37e-38	-1.16625	0.568	0.565	1.06e-33	6	PPDPF
1.04e-37	-1.02331	0.151	0.31	2.53e-33	6	TPM1
4.12e-35	-1.31368	0.115	0.267	1e-30	6	LINC00662
1.09e-34	-1.76858	0.268	0.388	2.64e-30	6	GDF15
1.18e-34	-1.25026	0.26	0.382	2.88e-30	6	TSTD1
1.4e-34	-1.20124	0.246	0.384	3.4e-30	6	NUDT4
4.39e-34	-1.15062	0.174	0.324	1.07e-29	6	SELENOM
2.87e-33	-1.10625	0.179	0.315	6.98e-29	6	NEDD4L
7.92e-33	-1.08332	0.147	0.295	1.93e-28	6	XAB2
9.84e-33	-1.13867	0.128	0.268	2.39e-28	6	NUDT8
1.89e-32	-1.14184	0.19	0.324	4.6e-28	6	TPD52
2.37e-31	-1.04652	0.181	0.319	5.76e-27	6	BNIP3
2.49e-29	-1.00647	0.308	0.408	6.06e-25	6	MARCKSL1
5.05e-29	-1.22091	0.285	0.384	1.23e-24	6	SNRPN
6.54e-29	-1.3012	0.177	0.297	1.59e-24	6	KLK4
1.99e-28	-1.12123	0.204	0.332	4.85e-24	6	CCNG2
4.25e-28	-1.29326	0.288	0.372	1.03e-23	6	HEBP2
4.37e-27	-1.08773	0.266	0.374	1.06e-22	6	GLO1
6.82e-27	-1.72099	0.184	0.294	1.66e-22	6	AGR2
3.3e-25	-1.35415	0.41	0.452	8.04e-21	6	DCXR
1.45e-22	-1.08716	0.204	0.313	3.54e-18	6	CLDN4
4.6e-21	-1.21876	0.259	0.345	1.12e-16	6	APP
5.78e-21	-1.11362	0.281	0.354	1.41e-16	6	PPP3CA
2.66e-19	-1.20233	0.311	0.387	6.46e-15	6	CYB5A
3.73e-15	-1.15418	0.208	0.286	9.08e-11	6	AMACR
4.49e-15	-2.17638	0.179	0.256	1.09e-10	6	PLA2G2A
2.82e-13	-1.01824	0.316	0.374	6.87e-09	6	MEAF6
1.02e-12	1.5729	0.386	0.335	2.47e-08	6	SELENOP
1.39e-11	-1.0786	0.326	0.229	3.38e-07	6	HMGA1
2.39e-10	-1.12297	0.461	0.447	5.81e-06	6	DHRS7
4.28e-08	-1.176	0.574	0.503	0.0010412	6	SMS
0	4.44741	0.588	0.03	0	7	CCL14
0	3.47427	0.488	0.007	0	7	ACKR1
0	3.22943	0.838	0.089	0	7	IFI27
0	2.90891	0.63	0.133	0	7	SPRY1
0	2.82266	0.829	0.119	0	7	SPARCL1
0	2.56439	0.587	0.082	0	7	IGFBP4
0	2.479	0.659	0.086	0	7	GNG11
0	2.40566	0.483	0.055	0	7	AQP1
0	2.38591	0.829	0.255	0	7	IFITM3
0	2.37522	0.609	0.082	0	7	RAMP2
0	2.3463	0.522	0.071	0	7	VWF
0	2.23604	0.881	0.193	0	7	IGFBP7
0	2.20244	0.542	0.079	0	7	PCAT19
0	2.135	0.537	0.064	0	7	RNASE1
0	2.07417	0.488	0.113	0	7	EMP1
0	2.03514	0.501	0.069	0	7	ENG
0	2.00722	0.772	0.323	0	7	HLA-E
0	1.98767	0.54	0.058	0	7	PLVAP
0	1.98184	0.443	0.052	0	7	CAVIN2
0	1.97489	0.45	0.041	0	7	RAMP3
0	1.94506	0.807	0.245	0	7	CD74
0	1.94252	0.65	0.202	0	7	IFITM2
0	1.91261	0.493	0.052	0	7	ADGRL4
0	1.89776	0.662	0.158	0	7	GSN
0	1.84329	0.485	0.055	0	7	EMCN
0	1.82776	0.468	0.072	0	7	PECAM1
0	1.82082	0.355	0.037	0	7	PLAT
0	1.75659	0.445	0.074	0	7	HLA-DRB5
0	1.74739	0.441	0.073	0	7	GIMAP7
0	1.73822	0.439	0.048	0	7	ECSCR
0	1.73777	0.478	0.092	0	7	HSPG2
0	1.73755	0.468	0.095	0	7	TGFBR2
0	1.69795	0.63	0.165	0	7	HLA-DRB1
0	1.68779	0.392	0.042	0	7	TSPAN7
0	1.67926	0.829	0.339	0	7	VIM
0	1.67345	0.404	0.049	0	7	CLEC14A
0	1.5995	0.369	0.046	0	7	SLCO2A1
0	1.58446	0.603	0.142	0	7	A2M
0	1.54228	0.989	0.743	0	7	B2M
0	1.52138	0.347	0.046	0	7	NOSTRIN
0	1.52043	0.325	0.045	0	7	THBD
0	1.41695	0.37	0.047	0	7	LMCD1
0	1.40953	0.393	0.062	0	7	FLT1
0	1.38936	0.314	0.035	0	7	ADCY4
0	1.38771	0.375	0.059	0	7	CD93
0	1.38483	0.341	0.032	0	7	DIPK2B
0	1.38078	0.373	0.05	0	7	LDB2
0	1.34864	0.322	0.04	0	7	COL15A1
0	1.31775	0.276	0.029	0	7	FAM167B
0	1.30351	0.346	0.05	0	7	CALCRL
0	1.29455	0.309	0.04	0	7	MMRN2
0	1.29382	0.34	0.052	0	7	PTPRB
0	1.27455	0.331	0.041	0	7	TGFBR3
0	1.24332	0.303	0.033	0	7	JAM2
0	1.23187	0.271	0.025	0	7	ABCG2
0	1.14593	0.661	0.201	0	7	HLA-DRA
0	1.13812	0.295	0.039	0	7	SNCG
0	1.11865	0.298	0.037	0	7	CYYR1
0	1.10369	0.26	0.003	0	7	SELP
0	1.04513	0.256	0.028	0	7	FAM107A
2.36e-302	1.75034	0.537	0.141	5.75e-298	7	TCF4
1.83e-299	1.42012	0.376	0.067	4.46e-295	7	ESAM
8.23e-294	1.61047	0.85	0.397	2e-289	7	HLA-B
4.36e-293	1.73852	0.439	0.099	1.06e-288	7	EGFL7
2.1e-292	1.62998	0.482	0.112	5.12e-288	7	CRIP2
2.45e-292	1.65405	0.482	0.113	5.96e-288	7	IFITM1
1.06e-291	1.59946	0.367	0.07	2.59e-287	7	TSHZ2
2.6e-290	1.76277	0.718	0.25	6.33e-286	7	TM4SF1
4.49e-289	1.47451	0.951	0.712	1.09e-284	7	TMSB10
5.19e-287	1.28545	0.319	0.05	1.26e-282	7	CD34
3.87e-282	1.24083	0.28	0.039	9.4e-278	7	TM4SF18
2.18e-279	1.21151	0.288	0.042	5.3e-275	7	GJA1
3.08e-275	1.05072	0.258	0.034	7.49e-271	7	TFPI
6.11e-275	1.71505	0.596	0.182	1.49e-270	7	ID3
4.24e-273	1.71585	0.285	0.042	1.03e-268	7	CLDN5
2.53e-267	1.91999	0.493	0.135	6.15e-263	7	SLC2A3
1.55e-265	1.12086	0.266	0.038	3.76e-261	7	LIMS2
1.34e-260	2.27649	0.529	0.166	3.26e-256	7	SOCS3
5.95e-258	1.49062	0.474	0.118	1.45e-253	7	ITM2A
4.74e-257	1.65991	0.404	0.093	1.15e-252	7	PDLIM1
1.17e-253	1.25309	0.384	0.08	2.85e-249	7	NNMT
2.73e-247	1.43759	0.449	0.112	6.65e-243	7	STOM
2.48e-242	1.39647	0.352	0.072	6.02e-238	7	GIMAP4
6.61e-238	1.3189	0.368	0.081	1.61e-233	7	SH3BP5
8.09e-238	1.5711	0.46	0.124	1.97e-233	7	VAMP5
1.25e-237	1.50783	0.428	0.11	3.04e-233	7	ETS2
2.53e-237	1.33281	0.478	0.127	6.15e-233	7	CAVIN1
4.79e-235	1.55859	0.452	0.121	1.17e-230	7	IFI16
4.17e-232	1.04899	0.986	0.827	1.01e-227	7	TMSB4X
2.91e-231	1.21413	0.512	0.136	7.09e-227	7	CAV1
7.94e-227	1.31566	0.32	0.065	1.93e-222	7	PALMD
1.6e-219	1.41712	0.365	0.086	3.89e-215	7	NCOA7
2.13e-211	1.08672	0.298	0.059	5.19e-207	7	ELK3
1.2e-210	1.46115	0.373	0.091	2.92e-206	7	CTSC
6.83e-210	1.33352	0.51	0.147	1.66e-205	7	TIMP3
4.7e-206	1.13732	0.294	0.059	1.14e-201	7	HEG1
1.37e-205	2.03776	0.536	0.206	3.33e-201	7	KLF2
1.85e-205	1.40428	0.491	0.156	4.51e-201	7	EPAS1
6.05e-203	1.38514	0.404	0.105	1.47e-198	7	MEF2C
8.9e-200	1.0137	0.264	0.048	2.16e-195	7	GIMAP5
2.58e-199	1.39933	0.434	0.123	6.29e-195	7	BST2
8.55e-198	1.2915	0.355	0.086	2.08e-193	7	PALM2-AKAP2
1.08e-195	1.06801	0.265	0.05	2.62e-191	7	ENTPD1
6.66e-194	1.0271	0.611	0.218	1.62e-189	7	ADIRF
1e-187	1.25568	0.304	0.067	2.44e-183	7	TMEM88
1.78e-177	1.12176	0.306	0.07	4.34e-173	7	XAF1
8.34e-177	-3.12063	0.64	0.83	2.03e-172	7	KLK3
2.1e-175	1.22146	0.77	0.394	5.1e-171	7	HLA-A
6.76e-174	1.40923	0.801	0.558	1.64e-169	7	ITM2B
1.36e-173	1.03205	0.251	0.049	3.32e-169	7	S1PR1
3.79e-168	1.44966	0.379	0.12	9.22e-164	7	PRCP
1.05e-164	1.25017	0.347	0.098	2.55e-160	7	ITGA6
3.9e-160	-2.16882	0.47	0.746	9.5e-156	7	KLK2
2.16e-159	1.02517	0.299	0.072	5.26e-155	7	GAS6
1.38e-153	1.29896	0.522	0.217	3.35e-149	7	CNN3
1.3e-151	1.02267	0.344	0.095	3.16e-147	7	HLA-DMA
2.2e-151	1.26005	0.766	0.47	5.35e-147	7	HLA-C
2.98e-151	1.30034	0.484	0.18	7.25e-147	7	ID1
1.03e-149	1.60012	0.42	0.154	2.5e-145	7	ARL4A
1.03e-148	-2.33328	0.307	0.66	2.5e-144	7	H2AFJ
2.75e-146	1.66518	0.62	0.335	6.69e-142	7	TXNIP
6.39e-146	1.10657	0.269	0.064	1.56e-141	7	PODXL
1.05e-145	1.73339	0.438	0.178	2.56e-141	7	LIFR
3.56e-135	1.56565	0.624	0.379	8.66e-131	7	FKBP1A
8.42e-133	1.14127	0.269	0.069	2.05e-128	7	APOLD1
4.44e-131	-2.40433	0.166	0.538	1.08e-126	7	TRGC1
1.45e-125	1.25719	0.309	0.093	3.54e-121	7	PDK4
4.49e-124	-2.53997	0.182	0.532	1.09e-119	7	SPON2
4.13e-121	1.52891	0.34	0.12	1e-116	7	HYAL2
9.59e-119	1.36034	0.455	0.206	2.33e-114	7	SPTBN1
1.81e-115	-2.51979	0.19	0.534	4.4e-111	7	TFF3
2.46e-112	-3.14775	0.187	0.528	5.97e-108	7	MSMB
9.52e-112	1.26799	0.45	0.201	2.32e-107	7	TACC1
2.93e-110	1.08326	0.329	0.115	7.13e-106	7	WWTR1
5.68e-110	-2.39229	0.064	0.412	1.38e-105	7	LINC01088
3.88e-109	1.12436	0.292	0.095	9.45e-105	7	TGM2
2.34e-103	-1.49573	0.051	0.39	5.69e-99	7	TSTD1
3.71e-103	1.25332	0.36	0.15	9.03e-99	7	DUSP23
1.69e-102	1.32825	0.424	0.185	4.12e-98	7	IFI6
1.29e-100	1.16547	0.343	0.13	3.13e-96	7	SEC14L1
3.69e-99	-2.00755	0.404	0.627	8.98e-95	7	PDLIM5
5.6e-98	-1.96795	0.126	0.441	1.36e-93	7	TSPAN1
1.66e-96	1.38098	0.671	0.485	4.03e-92	7	ZFP36
1.3e-95	-1.75369	0.061	0.38	3.16e-91	7	MGST1
1.1e-94	-1.84638	0.133	0.449	2.69e-90	7	FXYD3
1.59e-94	1.01416	0.304	0.111	3.87e-90	7	EHD4
1.25e-93	1.11726	0.328	0.127	3.04e-89	7	MTUS1
2.6e-92	-1.58344	0.303	0.578	6.32e-88	7	MPC2
1.15e-91	1.00238	0.341	0.132	2.81e-87	7	PLPP3
9.82e-91	-1.68857	0.152	0.454	2.39e-86	7	KRT18
1.19e-90	-1.99224	0.11	0.412	2.9e-86	7	PCA3
7.73e-90	-1.38812	0.077	0.388	1.88e-85	7	SPINT2
8.04e-90	-1.8045	0.066	0.368	1.96e-85	7	FOLH1
2.97e-89	1.29654	0.434	0.228	7.22e-85	7	IL6ST
1.37e-88	-1.56598	0.071	0.374	3.32e-84	7	TMPRSS2
1.88e-88	-1.53029	0.085	0.394	4.57e-84	7	MESP1
1.58e-87	-1.65348	0.067	0.367	3.85e-83	7	STEAP2
5.75e-86	-1.80976	0.194	0.476	1.4e-81	7	RDH11
1.24e-84	1.04729	0.671	0.499	3.03e-80	7	MYL12A
1.86e-84	-1.54027	0.225	0.519	4.52e-80	7	SMS
8.29e-84	-1.59602	0.087	0.388	2.02e-79	7	AZGP1
2.2e-83	-1.43458	0.166	0.462	5.36e-79	7	DCXR
7.01e-83	-1.4647	0.109	0.408	1.7e-78	7	KRT8
5.1e-82	1.09408	0.434	0.215	1.24e-77	7	TAGLN2
1.59e-81	-1.61667	0.074	0.359	3.87e-77	7	NKX3-1
1.68e-81	1.32331	0.444	0.244	4.1e-77	7	RDX
1.74e-79	-2.04361	0.044	0.319	4.23e-75	7	MIPEP
4.22e-79	-1.41087	0.406	0.638	1.03e-74	7	DBI
1.46e-78	-1.34002	0.055	0.333	3.56e-74	7	SLC39A6
6.48e-78	-1.44143	0.067	0.35	1.58e-73	7	PART1
1.87e-77	-1.76632	0.111	0.395	4.56e-73	7	GDF15
2.51e-77	-1.01505	0.037	0.309	6.12e-73	7	RGS10
6.48e-76	-1.45613	0.054	0.328	1.58e-71	7	TRPM8
9.65e-76	1.02542	0.663	0.473	2.35e-71	7	CALM1
6.57e-75	1.16851	0.474	0.284	1.6e-70	7	MGST2
4.36e-74	1.14955	0.585	0.402	1.06e-69	7	ZFP36L1
1.78e-71	-1.32741	0.058	0.319	4.34e-67	7	LRRC26
3.13e-71	-1.28126	0.079	0.346	7.61e-67	7	SORD
7.46e-71	-1.15633	0.052	0.313	1.81e-66	7	SPDEF
1.43e-70	-1.36131	0.069	0.333	3.49e-66	7	SLC45A3
7.24e-70	-1.03279	0.044	0.301	1.76e-65	7	MLPH
8.24e-69	1.33363	0.478	0.293	2e-64	7	CDKN1A
1.03e-68	-1.38197	0.044	0.293	2.49e-64	7	OR51E2
1.21e-68	-1.08444	0.039	0.289	2.94e-64	7	FOXA1
2.75e-68	1.05605	0.46	0.276	6.7e-64	7	CCDC85B
1.76e-67	-1.27587	0.04	0.287	4.29e-63	7	RAMP1
5.51e-67	-1.38247	0.124	0.378	1.34e-62	7	TRPM4
2.4e-66	1.27595	0.307	0.138	5.84e-62	7	ICAM1
6.46e-65	-1.22593	0.155	0.414	1.57e-60	7	SNHG25
2.82e-64	1.20904	0.453	0.27	6.87e-60	7	CEBPD
5.15e-64	1.03348	0.406	0.218	1.25e-59	7	PRSS23
1.06e-63	-1.03155	0.026	0.257	2.57e-59	7	SLC4A4
1.65e-63	1.22789	0.353	0.171	4.02e-59	7	ISG15
1.89e-63	-1.08368	0.03	0.259	4.6e-59	7	STEAP1
2.15e-62	-1.1475	0.385	0.588	5.24e-58	7	SERP1
2.78e-62	-1.92009	0.068	0.299	6.75e-58	7	AGR2
4.64e-62	-1.1539	0.257	0.497	1.13e-57	7	UQCR10
9.99e-62	-1.44497	0.092	0.334	2.43e-57	7	ABCC4
5.49e-61	1.05965	0.465	0.295	1.34e-56	7	NFIB
1.28e-59	-1.05443	0.064	0.298	3.11e-55	7	XAB2
1.59e-59	-1.04593	0.041	0.265	3.87e-55	7	BASP1
1.11e-58	-1.22431	0.087	0.319	2.7e-54	7	MCCC2
5.9e-58	-1.14759	0.051	0.275	1.44e-53	7	SPOCK1
1.17e-57	1.00376	0.385	0.213	2.86e-53	7	GNAI2
5.31e-55	-1.18416	0.077	0.301	1.29e-50	7	KLK4
9.17e-55	-1.04405	0.084	0.318	2.23e-50	7	CLDN4
5.74e-54	-1.07614	0.097	0.328	1.4e-49	7	TACSTD2
1.55e-53	-1.00949	0.04	0.25	3.78e-49	7	ELF3
3.4e-53	1.24655	0.574	0.417	8.28e-49	7	GADD45B
3.6e-53	-1.39658	0.144	0.374	8.77e-49	7	ACPP
9.46e-53	1.20036	0.388	0.202	2.3e-48	7	RGCC
2.4e-52	-1.2578	0.059	0.269	5.83e-48	7	LINC00662
2.6e-52	1.00237	0.397	0.237	6.32e-48	7	MYH9
4.76e-52	1.16906	0.275	0.133	1.16e-47	7	ABL2
5.59e-52	1.00067	0.646	0.476	1.36e-47	7	NFKBIA
6e-52	1.06731	0.291	0.143	1.46e-47	7	BHLHE40
5.91e-51	-1.0096	0.14	0.359	1.44e-46	7	PMEPA1
1.09e-50	1.24431	0.473	0.317	2.64e-46	7	IRF1
3.26e-48	-1.09296	0.25	0.448	7.94e-44	7	XBP1
5.85e-48	1.0326	0.419	0.277	1.42e-43	7	NDRG1
2.94e-47	-1.01964	0.167	0.382	7.14e-43	7	ASAH1
2.97e-47	-1.25079	0.136	0.336	7.22e-43	7	GOLM1
1.36e-45	1.09598	0.274	0.136	3.31e-41	7	ADAMTS1
1.82e-45	-1.05807	0.186	0.388	4.42e-41	7	SNRPN
4.69e-45	1.16301	0.253	0.123	1.14e-40	7	TCIM
3.53e-43	-1.10084	0.096	0.29	8.6e-39	7	AMACR
1.54e-41	1.12183	0.373	0.23	3.74e-37	7	INSR
2.21e-41	-1.04721	0.192	0.375	5.37e-37	7	HEBP2
7.88e-41	-1.0238	0.263	0.455	1.92e-36	7	DHRS7
6.76e-40	-1.00335	0.144	0.333	1.64e-35	7	CCNG2
2.41e-39	1.05652	0.46	0.328	5.88e-35	7	KLF4
2.56e-38	1.17687	0.45	0.315	6.24e-34	7	HES1
1.72e-37	-1.09031	0.359	0.504	4.18e-33	7	NUPR1
2.04e-36	1.20138	0.376	0.251	4.98e-32	7	SLC9A3R2
3.74e-32	-1.03914	0.103	0.265	9.09e-28	7	SYCE1L
1.44e-27	1.05306	0.403	0.308	3.5e-23	7	MIDN
5.8e-20	-1.0163	0.188	0.322	1.41e-15	7	FABP5
1.31e-19	-1.18109	0.581	0.668	3.19e-15	7	CST3
2.73e-15	-1.0666	0.291	0.417	6.64e-11	7	MT1E
4.13e-15	1.2767	0.384	0.321	1.01e-10	7	SBDS
4.91e-09	-1.14061	0.178	0.256	0.000119512	7	PLA2G2A
0	3.78268	0.981	0.083	0	8	IFI27
0	3.71363	0.634	0.044	0	8	IGFBP3
0	3.46396	0.768	0.048	0	8	PLVAP
0	3.36134	0.953	0.113	0	8	SPARCL1
0	3.33983	0.849	0.042	0	8	FLT1
0	3.24355	0.616	0.028	0	8	CLDN5
0	3.22764	0.918	0.207	0	8	INSR
0	3.22142	0.934	0.068	0	8	RAMP2
0	3.15504	0.73	0.187	0	8	RGCC
0	3.13405	0.772	0.114	0	8	PLPP3
0	3.07396	0.479	0.017	0	8	ESM1
0	3.06081	0.75	0.128	0	8	SPRY1
0	3.03248	0.84	0.077	0	8	HSPG2
0	3.02323	0.953	0.127	0	8	A2M
0	3.00691	0.936	0.19	0	8	IGFBP7
0	3.00652	0.907	0.075	0	8	GNG11
0	2.96442	0.449	0.022	0	8	ENPP2
0	2.96376	0.743	0.06	0	8	COL4A1
0	2.9085	0.892	0.229	0	8	SLC9A3R2
0	2.9042	0.873	0.038	0	8	EMCN
0	2.85751	0.99	0.248	0	8	IFITM3
0	2.82719	0.736	0.061	0	8	VWF
0	2.74752	0.932	0.146	0	8	GSN
0	2.69236	0.87	0.055	0	8	PECAM1
0	2.67823	0.907	0.138	0	8	EPAS1
0	2.66397	0.938	0.306	0	8	PLPP1
0	2.63874	0.855	0.037	0	8	ADGRL4
0	2.63586	0.823	0.056	0	8	ENG
0	2.61182	0.86	0.05	0	8	RNASE1
0	2.59913	0.89	0.095	0	8	CRIP2
0	2.58509	0.877	0.126	0	8	TCF4
0	2.56685	0.825	0.031	0	8	CLEC14A
0	2.46929	0.791	0.042	0	8	PODXL
0	2.4178	0.91	0.13	0	8	TIMP3
0	2.39573	0.77	0.032	0	8	CALCRL
0	2.37652	0.826	0.047	0	8	ESAM
0	2.37197	0.981	0.314	0	8	HLA-E
0	2.3645	0.579	0.027	0	8	EDNRB
0	2.36449	0.673	0.06	0	8	COL4A2
0	2.35037	0.926	0.19	0	8	IFITM2
0	2.31693	0.779	0.084	0	8	EGFL7
0	2.29416	0.773	0.03	0	8	CD34
0	2.29126	0.607	0.114	0	8	VWA1
0	2.28615	0.833	0.108	0	8	VAMP5
0	2.27748	0.665	0.047	0	8	AQP1
0	2.27687	0.466	0.022	0	8	STC1
0	2.27042	0.609	0.022	0	8	KDR
0	2.26678	0.772	0.042	0	8	CD93
0	2.20897	0.792	0.111	0	8	SEC14L1
0	2.20681	0.768	0.034	0	8	PTPRB
0	2.20557	0.53	0.06	0	8	ANGPT2
0	2.18437	0.752	0.03	0	8	NOTCH4
0	2.18418	0.774	0.098	0	8	STOM
0	2.17272	0.681	0.017	0	8	PDGFD
0	2.17213	0.682	0.042	0	8	CAVIN2
0	2.16613	0.673	0.042	0	8	TMEM204
0	2.16195	0.768	0.101	0	8	IFITM1
0	2.14733	0.548	0.057	0	8	RBP7
0	2.14276	0.604	0.034	0	8	RAMP3
0	2.13694	0.718	0.034	0	8	ADGRF5
0	2.12469	0.958	0.314	0	8	APP
0	2.10478	0.767	0.034	0	8	ECSCR
0	2.0986	0.767	0.089	0	8	MEF2C
0	2.07351	0.734	0.103	0	8	HYAL2
0	2.06376	0.952	0.263	0	8	MGP
0	2.03825	0.593	0.026	0	8	TM4SF18
0	2.03804	0.768	0.101	0	8	EMP1
0	2.03623	0.75	0.06	0	8	GIMAP7
0	2.03421	0.929	0.365	0	8	FKBP1A
0	2.02567	0.73	0.034	0	8	LDB2
0	2.02442	0.355	0.05	0	8	DEPP1
0	2.02395	0.55	0.033	0	8	THY1
0	2.02094	0.819	0.168	0	8	IFI6
0	2.01938	0.633	0.053	0	8	TMEM88
0	2.01104	0.645	0.161	0	8	SOCS3
0	1.99178	0.598	0.036	0	8	SLCO2A1
0	1.97837	0.99	0.391	0	8	HLA-B
0	1.97276	0.814	0.191	0	8	SPTBN1
0	1.97207	0.782	0.069	0	8	PCAT19
0	1.95318	0.719	0.084	0	8	TGFBR2
0	1.93484	0.684	0.038	0	8	ICAM2
0	1.92212	0.772	0.195	0	8	KLF2
0	1.92088	0.661	0.085	0	8	UACA
0	1.91194	0.772	0.152	0	8	ARHGAP29
0	1.90907	0.77	0.109	0	8	BST2
0	1.90093	0.772	0.074	0	8	IGFBP4
0	1.89649	0.845	0.172	0	8	ID3
0	1.88848	0.904	0.319	0	8	ITGB1
0	1.88477	0.755	0.203	0	8	PRSS23
0	1.87928	0.805	0.167	0	8	ID1
0	1.86297	0.43	0.03	0	8	CA2
0	1.86268	0.585	0.055	0	8	APOLD1
0	1.85926	0.802	0.113	0	8	CAVIN1
0	1.85402	0.689	0.112	0	8	MTUS1
0	1.84631	0.95	0.461	0	8	CALM1
0	1.84319	0.649	0.055	0	8	XAF1
0	1.83105	0.661	0.024	0	8	CDH5
0	1.82843	0.816	0.228	0	8	RDX
0	1.8278	0.829	0.122	0	8	CAV1
0	1.82515	0.486	0.033	0	8	COL15A1
0	1.79511	0.949	0.334	0	8	VIM
0	1.79023	0.997	0.71	0	8	TMSB10
0	1.77223	1	0.743	0	8	B2M
0	1.77064	0.637	0.031	0	8	TSPAN7
0	1.77023	0.978	0.461	0	8	HLA-C
0	1.76959	0.897	0.243	0	8	TM4SF1
0	1.76679	0.634	0.026	0	8	MMRN2
0	1.74811	0.623	0.033	0	8	S1PR1
0	1.74431	0.766	0.187	0	8	TACC1
0	1.74048	0.822	0.199	0	8	SPARC
0	1.70744	0.647	0.062	0	8	PTPRG
0	1.69736	0.667	0.058	0	8	GIMAP4
0	1.69596	0.734	0.154	0	8	ISG15
0	1.69281	0.621	0.098	0	8	EHD4
0	1.681	0.488	0.034	0	8	GJA1
0	1.66176	0.975	0.385	0	8	HLA-A
0	1.6589	0.596	0.134	0	8	GASK1B
0	1.65073	0.984	0.551	0	8	ITM2B
0	1.64446	0.602	0.024	0	8	CYYR1
0	1.63776	0.491	0.038	0	8	THBD
0	1.62878	0.742	0.198	0	8	GNAI2
0	1.60492	0.595	0.088	0	8	ITGA6
0	1.59287	0.591	0.127	0	8	NRP1
0	1.57266	0.669	0.201	0	8	EFNB2
0	1.56438	0.588	0.076	0	8	HTRA1
0	1.55788	0.596	0.096	0	8	PIK3R3
0	1.54965	0.559	0.073	0	8	SH3BP5
0	1.54487	0.638	0.073	0	8	ETS1
0	1.54356	0.715	0.11	0	8	IFI16
0	1.54152	0.589	0.046	0	8	HEG1
0	1.5405	0.648	0.127	0	8	SWAP70
0	1.54046	0.716	0.114	0	8	MSN
0	1.52653	0.794	0.281	0	8	NFIB
0	1.51756	0.545	0.055	0	8	PALMD
0	1.50307	0.943	0.501	0	8	MYL12B
0	1.50161	0.469	0.016	0	8	HECW2
0	1.49702	0.452	0.015	0	8	BTNL9
0	1.49605	0.675	0.139	0	8	NEDD9
0	1.49447	0.518	0.015	0	8	KCNN3
0	1.49443	0.514	0.046	0	8	MCAM
0	1.49132	0.819	0.326	0	8	TXNIP
0	1.48953	0.923	0.426	0	8	TSC22D1
0	1.48885	0.503	0.057	0	8	MIR4435-2HG
0	1.48516	0.663	0.19	0	8	JAG1
0	1.46791	0.8	0.277	0	8	BCAM
0	1.45697	0.669	0.109	0	8	ITM2A
0	1.45368	0.495	0.042	0	8	ARL15
0	1.45127	0.586	0.131	0	8	SLC2A3
0	1.44392	0.492	0.019	0	8	SOX18
0	1.43945	0.549	0.045	0	8	PLXND1
0	1.43742	0.704	0.216	0	8	IL6ST
0	1.43159	0.445	0.021	0	8	TMEM233
0	1.42817	0.404	0.024	0	8	FAM167B
0	1.41906	0.572	0.106	0	8	CYTOR
0	1.41597	0.84	0.228	0	8	SRGN
0	1.41322	0.488	0.019	0	8	CDH13
0	1.40529	0.646	0.101	0	8	WWTR1
0	1.39938	0.569	0.061	0	8	GAS6
0	1.39513	0.308	0.008	0	8	FCN3
0	1.39296	0.639	0.101	0	8	ETS2
0	1.38477	0.499	0.026	0	8	DLL4
0	1.38421	0.585	0.095	0	8	ASAP1
0	1.38105	0.747	0.264	0	8	CCDC85B
0	1.38065	0.792	0.27	0	8	MGST2
0	1.3784	0.551	0.069	0	8	HLA-DRB5
0	1.37746	0.491	0.042	0	8	GRB10
0	1.37455	0.44	0.045	0	8	PDGFB
0	1.37242	0.712	0.224	0	8	MYH9
0	1.37095	0.59	0.114	0	8	DUSP6
0	1.36863	0.817	0.157	0	8	HLA-DRB1
0	1.36676	0.544	0.048	0	8	DOCK9
0	1.36432	0.448	0.021	0	8	PCDH17
0	1.36289	0.463	0.023	0	8	HEY1
0	1.3424	0.449	0.02	0	8	ROBO4
0	1.34225	0.466	0.041	0	8	NOSTRIN
0	1.33998	0.743	0.207	0	8	CNN3
0	1.33626	0.719	0.248	0	8	ACTN4
0	1.33254	0.536	0.085	0	8	TGM2
0	1.32207	0.608	0.078	0	8	TIMP2
0	1.31557	0.735	0.202	0	8	TAGLN2
0	1.31556	0.476	0.033	0	8	LRRC32
0	1.30988	0.594	0.143	0	8	BMPR2
0	1.30903	0.449	0.045	0	8	ITGA1
0	1.30642	0.545	0.08	0	8	PTPN14
0	1.30431	0.548	0.087	0	8	PDLIM1
0	1.29488	0.687	0.178	0	8	EMP2
0	1.29468	0.571	0.077	0	8	PALM2-AKAP2
0	1.28681	0.504	0.029	0	8	LMO2
0	1.28123	0.502	0.02	0	8	MYCT1
0	1.27092	0.475	0.026	0	8	DIPK2B
0	1.26953	0.419	0.02	0	8	SOX17
0	1.2671	0.457	0.056	0	8	SPRY4
0	1.2651	0.623	0.177	0	8	DHRS3
0	1.26369	0.441	0.03	0	8	NES
0	1.2553	0.713	0.247	0	8	LEPROT
0	1.24853	0.58	0.056	0	8	COX7A1
0	1.24356	0.379	0.023	0	8	FAM107A
0	1.24167	0.53	0.049	0	8	ELK3
0	1.23879	0.458	0.029	0	8	ADCY4
0	1.23821	0.534	0.122	0	8	PINK1
0	1.23444	0.517	0.038	0	8	GIMAP5
0	1.23214	0.538	0.068	0	8	DPYSL2
0	1.23146	0.59	0.142	0	8	KIAA0355
0	1.23096	0.904	0.241	0	8	CD74
0	1.23009	0.477	0.045	0	8	DLC1
0	1.22682	0.69	0.169	0	8	ARHGDIB
0	1.22637	0.51	0.068	0	8	TMEM47
0	1.22269	0.491	0.062	0	8	PRDM1
0	1.22132	0.463	0.106	0	8	OSBPL1A
0	1.22022	0.751	0.276	0	8	CDC37
0	1.21901	0.385	0.045	0	8	NRP2
0	1.21752	0.571	0.14	0	8	SGK1
0	1.21578	0.471	0.026	0	8	JAM2
0	1.21465	0.566	0.13	0	8	PTPN12
0	1.1983	0.522	0.111	0	8	PLK2
0	1.19803	0.502	0.045	0	8	ZEB1
0	1.19647	0.583	0.14	0	8	LUZP1
0	1.19134	0.462	0.03	0	8	LIMS2
0	1.18278	0.427	0.024	0	8	CX3CL1
0	1.18026	0.458	0.018	0	8	IL3RA
0	1.17882	0.435	0.026	0	8	PLXNA2
0	1.17384	0.533	0.055	0	8	CAVIN3
0	1.17319	0.742	0.289	0	8	CD81
0	1.16603	0.5	0.11	0	8	GMFG
0	1.16451	0.465	0.093	0	8	MAGI1
0	1.15501	0.487	0.081	0	8	NCOA7
0	1.15415	0.507	0.054	0	8	ITGA5
0	1.15199	0.488	0.036	0	8	PLS3
0	1.15118	0.449	0.05	0	8	PREX1
0	1.15007	0.451	0.042	0	8	ENTPD1
0	1.14952	0.399	0.022	0	8	MECOM
0	1.13787	0.613	0.123	0	8	CLIC4
0	1.12623	0.438	0.055	0	8	MEIS2
0	1.126	0.595	0.112	0	8	PSMB9
0	1.12546	0.451	0.021	0	8	TIE1
0	1.1184	0.493	0.075	0	8	TNS2
0	1.11306	0.396	0.03	0	8	RFLNB
0	1.10967	0.525	0.106	0	8	PPFIBP1
0	1.10554	0.391	0.028	0	8	RAPGEF4
0	1.10229	0.55	0.057	0	8	CAV2
0	1.1015	0.461	0.081	0	8	CPM
0	1.09809	0.427	0.028	0	8	TMEM255B
0	1.09185	0.39	0.031	0	8	F2R
0	1.09074	0.306	0.016	0	8	RBP5
0	1.07582	0.548	0.104	0	8	RBMS1
0	1.07338	0.673	0.078	0	8	S100A16
0	1.07095	0.436	0.06	0	8	EPHA4
0	1.06961	0.406	0.029	0	8	MMP2
0	1.06765	0.454	0.03	0	8	GIMAP1
0	1.0673	0.523	0.066	0	8	FYN
0	1.06628	0.637	0.191	0	8	FCGRT
0	1.06358	0.38	0.014	0	8	DYSF
0	1.06315	0.357	0.021	0	8	ABCG2
0	1.063	0.438	0.023	0	8	ERG
0	1.06131	0.423	0.041	0	8	GBP4
0	1.05095	0.431	0.02	0	8	ACVRL1
0	1.04113	0.551	0.124	0	8	TAX1BP3
0	1.0365	0.415	0.036	0	8	NUAK1
0	1.02808	0.475	0.088	0	8	CRIM1
0	1.02639	0.705	0.219	0	8	ARPC1B
0	1.01228	0.42	0.067	0	8	FZD4
0	1.00843	0.263	0.006	0	8	SEMA3G
0	1.00613	0.387	0.024	0	8	JAG2
0	-1.4505	1	0.995	0	8	RPL41
2.15e-307	1.34573	0.926	0.488	5.24e-303	8	MYL12A
3.2e-307	1.78818	0.397	0.076	7.79e-303	8	KCTD12
2.7e-303	-1.10715	0.993	0.987	6.58e-299	8	RPL13A
4.4e-303	1.23846	0.583	0.172	1.07e-298	8	LIFR
2.9e-301	1.04004	0.528	0.142	7.05e-297	8	FEZ2
3.07e-301	-1.33206	0.964	0.951	7.47e-297	8	RPS3A
2.13e-300	1.46123	0.807	0.322	5.17e-296	8	ID2
2.49e-296	1.60211	0.505	0.126	6.05e-292	8	ADAMTS1
1.39e-293	1.32837	0.763	0.302	3.38e-289	8	ZBTB16
1.87e-291	1.10199	0.998	0.826	4.55e-287	8	TMSB4X
5.47e-291	1.07786	0.614	0.199	1.33e-286	8	LIMCH1
1.77e-290	1.43366	0.425	0.09	4.3e-286	8	CXCL12
9.64e-290	1.01615	0.651	0.224	2.34e-285	8	PTTG1IP
9.49e-289	1.07497	0.675	0.23	2.31e-284	8	YWHAH
1.22e-279	1.1993	0.529	0.148	2.96e-275	8	HBEGF
2.27e-274	1.06571	0.64	0.213	5.52e-270	8	SERPINH1
7.64e-272	1.5272	0.533	0.157	1.86e-267	8	IVNS1ABP
4.65e-271	1.18822	0.529	0.153	1.13e-266	8	IFNGR1
1.37e-268	1.11947	0.857	0.422	3.34e-264	8	GNAS
1.88e-265	-1.24815	0.981	0.953	4.58e-261	8	RPL12
2.1e-262	1.1601	0.5	0.134	5.11e-258	8	BHLHE40
2.45e-262	1.05918	0.93	0.499	5.97e-258	8	RAC1
6.42e-259	1.01275	0.418	0.101	1.56e-254	8	LAMC1
2.76e-258	1.10728	0.847	0.419	6.71e-254	8	YWHAB
5.98e-249	1.07368	0.558	0.183	1.46e-244	8	KLF9
2.53e-246	1.26769	0.459	0.125	6.17e-242	8	ABL2
8.43e-242	1.03484	0.86	0.429	2.05e-237	8	KTN1
7.75e-240	1.09046	0.526	0.173	1.89e-235	8	TSPAN14
5.92e-237	1.16636	0.722	0.301	1.44e-232	8	CTNNB1
1.25e-236	1.07898	0.632	0.246	3.05e-232	8	UTRN
2.32e-236	1.30973	0.397	0.097	5.64e-232	8	THSD7A
3.82e-236	-1.90904	0.946	0.926	9.28e-232	8	FTL
4.01e-236	1.00381	0.507	0.161	9.77e-232	8	PIK3C2A
1.52e-230	1.30944	0.695	0.28	3.7e-226	8	DDIT4
5.97e-227	1.50529	0.715	0.303	1.45e-222	8	HES1
5.09e-224	1.05395	0.786	0.368	1.24e-219	8	ARGLU1
1.42e-222	1.01101	0.84	0.445	3.46e-218	8	POMP
1.03e-220	1.07109	0.813	0.404	2.52e-216	8	SELENOW
1.44e-218	-1.0258	0.975	0.939	3.5e-214	8	RPS4X
1.93e-217	1.11689	0.414	0.112	4.7e-213	8	ARHGAP18
4.82e-212	1.18949	0.676	0.296	1.17e-207	8	MIDN
7.4e-210	1.01086	0.674	0.297	1.8e-205	8	RAB13
1.04e-209	1.16353	0.834	0.406	2.53e-205	8	RHOB
3.05e-209	1.5962	0.962	0.688	7.43e-205	8	SRP14
5.43e-208	-1.12255	0.969	0.908	1.32e-203	8	RPL31
1.7e-206	-1.10524	0.939	0.902	4.13e-202	8	RPL10A
2.25e-204	-1.68963	0.952	0.926	5.47e-200	8	FTH1
8.64e-199	1.02012	0.698	0.313	2.1e-194	8	YBX3
3.76e-197	-4.12182	0.803	0.823	9.16e-193	8	KLK3
8.26e-184	-1.03367	0.968	0.935	2.01e-179	8	RPL7
2.46e-179	-1.35923	0.884	0.85	5.99e-175	8	RPLP0
1.68e-169	-1.01328	0.982	0.934	4.09e-165	8	RPL8
2.71e-168	-1.0607	0.931	0.874	6.58e-164	8	RPS5
3.63e-167	1.05491	0.454	0.14	8.84e-163	8	FN1
1.55e-166	1.21973	0.668	0.309	3.78e-162	8	IRF1
8.27e-159	-1.00518	0.972	0.936	2.01e-154	8	RPS2
3.58e-151	-2.8439	0.666	0.737	8.71e-147	8	KLK2
5.46e-147	-1.02382	0.934	0.832	1.33e-142	8	RPL14
5.9e-141	-1.00643	0.949	0.872	1.43e-136	8	RPL7A
7.18e-130	-3.42076	0.2	0.534	1.75e-125	8	TFF3
5.82e-128	-2.95458	0.223	0.536	1.42e-123	8	TRGC1
6.07e-125	-2.84668	0.483	0.652	1.48e-120	8	H2AFJ
5.61e-124	-1.10565	0.875	0.791	1.36e-119	8	RPS10
5.65e-121	1.0147	0.801	0.479	1.37e-116	8	ZFP36
1.33e-120	-3.96944	0.203	0.528	3.24e-116	8	MSMB
9.15e-101	-2.00963	0.062	0.38	2.23e-96	8	MGST1
4.25e-97	-2.13691	0.252	0.509	1.03e-92	8	NUPR1
1.15e-96	-2.96136	0.295	0.527	2.81e-92	8	SPON2
4.05e-96	-2.45765	0.117	0.412	9.86e-92	8	PCA3
9.61e-96	-2.70895	0.108	0.41	2.34e-91	8	LINC01088
6.4e-91	-2.15489	0.194	0.452	1.56e-86	8	KRT18
2.48e-88	-1.97705	0.128	0.407	6.03e-84	8	KRT8
5.62e-87	-2.19979	0.18	0.447	1.37e-82	8	FXYD3
3.23e-86	-1.65232	0.098	0.388	7.87e-82	8	TSTD1
3.84e-82	-2.32514	0.045	0.319	9.35e-78	8	MIPEP
1.16e-79	-1.78226	0.105	0.373	2.82e-75	8	TMPRSS2
5.93e-79	-2.20476	0.202	0.438	1.44e-74	8	TSPAN1
1.05e-74	-2.18906	0.045	0.3	2.56e-70	8	AGR2
1.54e-74	-1.77482	0.091	0.349	3.75e-70	8	PART1
1.83e-73	-1.90315	0.129	0.386	4.46e-69	8	AZGP1
5.26e-73	-1.48772	0.034	0.288	1.28e-68	8	RAMP1
4.95e-72	-1.82543	0.237	0.459	1.21e-67	8	DCXR
8.14e-72	-1.59151	0.137	0.386	1.98e-67	8	SPINT2
7.44e-71	-1.65223	0.083	0.332	1.81e-66	8	SLC45A3
3.52e-70	-1.15572	0.054	0.308	8.56e-66	8	RGS10
4.02e-70	-1.61876	0.078	0.329	9.78e-66	8	TACSTD2
5.3e-70	-1.84301	0.155	0.391	1.29e-65	8	MESP1
1.66e-67	-1.74994	0.121	0.357	4.05e-63	8	NKX3-1
3.6e-67	-1.51187	0.076	0.318	8.77e-63	8	LRRC26
1.24e-65	-1.72437	0.088	0.327	3.03e-61	8	TRPM8
1.25e-65	-1.08904	0.037	0.275	3.04e-61	8	PERP
3.24e-64	-1.36321	0.043	0.275	7.88e-60	8	SPOCK1
4.93e-64	-1.51311	0.06	0.292	1.2e-59	8	OR51E2
5.15e-64	-1.78995	0.139	0.364	1.25e-59	8	STEAP2
1.01e-63	-1.24738	0.057	0.288	2.46e-59	8	FOXA1
9.39e-63	-1.18907	0.113	0.357	2.28e-58	8	LITAF
2.06e-62	-1.92334	0.495	0.57	5.01e-58	8	MPC2
2.39e-62	-1.36397	0.099	0.331	5.81e-58	8	SLC39A6
5.28e-62	-1.23494	0.068	0.3	1.28e-57	8	MLPH
1.89e-61	-1.15433	0.04	0.265	4.6e-57	8	BASP1
2.42e-61	-1.34594	0.083	0.312	5.9e-57	8	SPDEF
3.2e-61	-1.26771	0.714	0.674	7.8e-57	8	GAS5
2.83e-60	-2.33608	0.646	0.617	6.89e-56	8	PDLIM5
9.93e-59	-1.51873	0.125	0.344	2.42e-54	8	SORD
1.76e-58	1.31436	0.286	0.126	4.29e-54	8	CXCL2
1.03e-57	-1.47906	0.082	0.3	2.51e-53	8	KLK4
2.02e-56	-1.03719	0.054	0.272	4.91e-52	8	HOXB13
2.11e-56	-1.10331	0.045	0.256	5.13e-52	8	SLC4A4
2.23e-56	-2.15828	0.669	0.664	5.44e-52	8	CST3
2.84e-55	-1.95381	0.103	0.326	6.9e-51	8	FABP5
4.53e-52	-1.03293	0.056	0.26	1.1e-47	8	ARHGEF26
5.47e-52	-1.58681	0.095	0.297	1.33e-47	8	CPE
1.17e-50	-1.18169	0.082	0.287	2.85e-46	8	CLDN3
1.26e-49	-1.42976	0.553	0.581	3.07e-45	8	SERP1
6.5e-49	-1.74001	0.181	0.363	1.58e-44	8	FOLH1
1.3e-48	-1.08808	0.763	0.696	3.17e-44	8	SNHG29
2.81e-48	-1.40813	0.117	0.317	6.83e-44	8	CLDN4
1.89e-45	-1.0051	0.067	0.258	4.59e-41	8	STEAP1
2.87e-44	-1.03418	0.08	0.265	6.97e-40	8	SCD
1.26e-43	-1.02387	0.1	0.283	3.06e-39	8	C19orf48
5.68e-43	-1.21982	0.088	0.269	1.38e-38	8	NUDT8
1.64e-42	-1.56677	0.151	0.331	4e-38	8	ABCC4
4.69e-41	-1.81821	0.229	0.389	1.14e-36	8	GDF15
2.63e-40	-1.18419	0.116	0.293	6.41e-36	8	ZG16B
5.35e-40	-1.89806	0.378	0.469	1.3e-35	8	RDH11
6.44e-38	-1.42681	0.179	0.334	1.57e-33	8	GOLM1
7.52e-37	-1.01072	0.104	0.274	1.83e-32	8	CKB
1.51e-35	-1.13438	0.15	0.309	3.68e-31	8	SNHG19
2.97e-35	-1.4652	0.64	0.628	7.23e-31	8	DBI
2.25e-34	-1.30914	0.273	0.409	5.48e-30	8	SNHG25
2.36e-33	-1.48005	0.251	0.373	5.74e-29	8	TRPM4
1.81e-32	-1.22792	0.168	0.316	4.41e-28	8	MCCC2
2.3e-32	-1.24845	0.559	0.567	5.59e-28	8	SNHG8
2.79e-32	-1.07888	0.137	0.292	6.78e-28	8	ANKRD37
4.23e-31	-1.09641	0.14	0.295	1.03e-26	8	XAB2
4.56e-30	-1.00207	0.171	0.324	1.11e-25	8	TPD52
5.9e-30	-1.07138	0.148	0.293	1.44e-25	8	ALDH1A3
9.34e-30	-1.65129	0.47	0.508	2.27e-25	8	SMS
5.27e-29	-1.28349	0.12	0.265	1.28e-24	8	SYCE1L
4.07e-28	-1.20268	0.447	0.502	9.91e-24	8	HMGN2
1.99e-26	-1.29789	0.155	0.288	4.85e-22	8	AMACR
5.24e-25	-1.24884	0.134	0.266	1.28e-20	8	LINC00662
4.51e-22	-1.05243	0.129	0.252	1.1e-17	8	RGS2
9.98e-22	-1.2217	0.294	0.371	2.43e-17	8	HEBP2
1.46e-21	-1.08643	0.214	0.33	3.56e-17	8	CCNG2
2.5e-21	-1.14264	0.65	0.609	6.08e-17	8	HSPE1
3.34e-20	-1.09519	0.544	0.519	8.12e-16	8	PEBP1
1.13e-19	-1.65836	0.287	0.368	2.75e-15	8	ACPP
1.48e-18	-1.36549	0.406	0.449	3.6e-14	8	DHRS7
2.63e-18	-1.00513	0.184	0.289	6.39e-14	8	PLPP5
8.28e-18	-1.13359	0.417	0.44	2.02e-13	8	XBP1
6.97e-15	-1.04471	0.299	0.352	1.7e-10	8	PMEPA1
1.67e-13	-1.00606	0.265	0.349	4.07e-09	8	FAM162A
8.2e-13	-1.11755	0.453	0.289	1.99e-08	8	ANXA1
2.24e-11	-1.06838	0.347	0.381	5.44e-07	8	SNRPN
4.01e-11	-1.03509	0.478	0.486	9.75e-07	8	HSPD1
6.01e-11	-1.02543	0.502	0.487	1.46e-06	8	UQCR10
0	1.66424	0.603	0.072	0	9	TMC5
0	1.63631	0.511	0.083	0	9	C15orf48
0	1.35379	0.876	0.257	0	9	CLDN3
0	1.32562	0.605	0.111	0	9	CD24
1.88e-303	1.19121	0.881	0.312	4.58e-299	9	SEC11C
2.81e-283	1.28592	0.844	0.29	6.83e-279	9	CLDN4
3.73e-272	1.89901	0.902	0.346	9.08e-268	9	ACPP
3.33e-269	1.54311	0.773	0.265	8.11e-265	9	AMACR
2.39e-265	1.04299	0.834	0.272	5.8e-261	9	KLK4
1.06e-211	1.61602	0.763	0.301	2.59e-207	9	FABP5
7.77e-194	1.12454	0.939	0.43	1.89e-189	9	DHRS7
1.54e-172	1.12542	0.668	0.247	3.75e-168	9	NUDT8
6.47e-167	1.0758	0.99	0.725	1.58e-162	9	KLK2
5.47e-138	1.23617	0.659	0.277	1.33e-133	9	ZFAND2A
4.38e-108	1.31335	0.586	0.241	1.07e-103	9	PLA2G2A
8.95e-68	-2.99309	0.186	0.428	2.18e-63	9	S100A6
2.37e-57	-2.72269	0.142	0.367	5.78e-53	9	VIM
2.74e-34	-1.11873	0.969	0.828	6.66e-30	9	TMSB4X
3.6e-25	-2.22632	0.13	0.257	8.76e-21	9	SRGN
1.37e-21	-1.08632	0.925	0.714	3.34e-17	9	TMSB10
2.74e-20	-1.45595	0.385	0.221	6.67e-16	9	MT1G
2.55e-19	-1.2039	0.605	0.363	6.2e-15	9	SOD2
1.33e-17	-1.48452	0.345	0.412	3.24e-13	9	HLA-A
2.32e-17	-2.80693	0.21	0.294	5.65e-13	9	MGP
4.17e-17	-1.40137	0.389	0.228	1.02e-12	9	HMGA1
1.4e-13	-1.79898	0.221	0.298	3.42e-09	9	ANXA1
2.26e-12	-1.06258	0.489	0.306	5.49e-08	9	CCN1
1.37e-11	-1.06146	0.374	0.232	3.34e-07	9	IER3
3.48e-11	-1.8159	0.258	0.31	8.46e-07	9	MIPEP
3.61e-10	-2.13554	0.887	0.73	8.78e-06	9	MT2A
1.44e-09	-1.47543	0.791	0.528	3.52e-05	9	MT1X
1.8e-09	-1.31712	0.437	0.273	4.37e-05	9	IFITM3
8.36e-07	-1.49529	0.33	0.214	0.0203304	9	HLA-DPB1
0	5.4177	0.961	0.05	0	10	RGS5
0	4.72144	0.883	0.075	0	10	TAGLN
0	4.24747	0.927	0.06	0	10	MYL9
0	4.21331	0.826	0.034	0	10	ACTA2
0	3.79416	0.975	0.243	0	10	CALD1
0	3.75645	0.903	0.053	0	10	TPM2
0	3.65839	0.661	0.017	0	10	MYH11
0	3.37025	0.705	0.132	0	10	C11orf96
0	3.35362	0.991	0.194	0	10	IGFBP7
0	3.30546	0.718	0.033	0	10	NDUFA4L2
0	3.17289	0.883	0.162	0	10	CRIP1
0	3.00252	0.593	0.019	0	10	HIGD1B
0	2.95494	0.947	0.209	0	10	ADIRF
0	2.73018	0.418	0.005	0	10	PLN
0	2.71771	0.449	0.01	0	10	MUSTN1
0	2.65016	0.67	0.02	0	10	PDGFRB
0	2.57846	0.726	0.053	0	10	NOTCH3
0	2.56457	0.944	0.12	0	10	SPARCL1
0	2.51642	0.63	0.038	0	10	CRISPLD2
0	2.51618	0.515	0.025	0	10	COL3A1
0	2.46809	0.727	0.061	0	10	MYLK
0	2.45846	0.886	0.137	0	10	TIMP3
0	2.45776	0.916	0.211	0	10	LGALS1
0	2.44786	0.647	0.03	0	10	PPP1R14A
0	2.44021	0.531	0.013	0	10	COX4I2
0	2.40989	0.838	0.284	0	10	TPM1
0	2.39661	0.803	0.184	0	10	TIMP1
0	2.37521	0.683	0.051	0	10	LHFPL6
0	2.2977	0.691	0.076	0	10	CPM
0	2.29533	0.548	0.027	0	10	COL1A2
0	2.23391	0.711	0.106	0	10	MAP1B
0	2.13517	0.622	0.046	0	10	MCAM
0	2.12302	0.557	0.026	0	10	GJA4
0	2.08787	0.925	0.256	0	10	IFITM3
0	2.05558	0.811	0.103	0	10	MFGE8
0	2.05219	0.612	0.057	0	10	COL18A1
0	2.04111	0.577	0.036	0	10	COL1A1
0	2.03437	0.654	0.066	0	10	COL4A2
0	1.97868	0.513	0.021	0	10	TPPP3
0	1.97261	0.542	0.042	0	10	IGFBP5
0	1.96344	0.578	0.084	0	10	FLNA
0	1.92186	0.537	0.021	0	10	SYNPO2
0	1.90852	0.628	0.069	0	10	COL4A1
0	1.82255	0.575	0.063	0	10	MAP3K20
0	1.82232	0.298	0.002	0	10	RERGL
0	1.80887	0.511	0.03	0	10	FILIP1L
0	1.7722	0.425	0.01	0	10	WFDC1
0	1.76529	0.375	0.029	0	10	ADAMTS4
0	1.75944	0.546	0.043	0	10	CSRP2
0	1.7573	0.562	0.041	0	10	TNS1
0	1.72722	0.46	0.063	0	10	HOPX
0	1.72167	0.513	0.095	0	10	PTP4A3
0	1.71166	0.405	0.009	0	10	CARMN
0	1.71149	0.471	0.027	0	10	PGF
0	1.67747	0.687	0.122	0	10	CAVIN1
0	1.66608	0.379	0.014	0	10	GUCY1A2
0	1.66481	0.559	0.058	0	10	CAVIN3
0	1.6591	0.548	0.047	0	10	TINAGL1
0	1.65893	0.619	0.099	0	10	MEF2C
0	1.60964	0.477	0.057	0	10	CAMK2N1
0	1.60348	0.933	0.339	0	10	VIM
0	1.5975	0.629	0.11	0	10	CRIP2
0	1.59685	0.346	0.044	0	10	THY1
0	1.59372	0.605	0.067	0	10	COL6A2
0	1.59246	0.421	0.067	0	10	RGS16
[truncated: 2,056 more rows]
