# Supplementary material for: Comprehensive analysis of macrophage-related genes in prostate cancer by integrated analysis of single-cell and bulk RNA sequencing
Source: Aging (Albany NY). 2024 Apr 24;16(8):6809–38. doi: 10.18632/aging.205727 (PMC11087116; doi:10.18632/aging.205727)
Supplement: Supplementary Table 3 [file aging-16-205727-s004.xlsx]

## Sheet: Supplementary Table 3
Supplementary Table 3. Macrophage marker genes.
p_val	avg_log2FC	pct.1	pct.2	p_val_adj	cluster	gene
0	5.08013	0.657	0.096	0	Macrophage	APOC1
0	4.99674	0.693	0.135	0	Macrophage	APOE
0	4.80481	0.971	0.184	0	Macrophage	HLA-DRA
0	4.66746	0.619	0.061	0	Macrophage	CCL3
0	4.33246	0.928	0.184	0	Macrophage	HLA-DPB1
0	4.27697	0.978	0.234	0	Macrophage	CD74
0	4.25768	0.556	0.017	0	Macrophage	IL1B
0	4.20248	0.799	0.027	0	Macrophage	LYZ
0	4.1982	0.917	0.137	0	Macrophage	HLA-DPA1
0	4.10454	0.943	0.065	0	Macrophage	TYROBP
0	4.06216	0.676	0.018	0	Macrophage	C1QB
0	4.04234	0.651	0.167	0	Macrophage	CXCL8
0	3.94402	0.689	0.02	0	Macrophage	C1QA
0	3.89418	0.509	0.031	0	Macrophage	CCL3L1
0	3.80175	0.913	0.15	0	Macrophage	HLA-DRB1
0	3.65001	0.814	0.062	0	Macrophage	IFI30
0	3.44213	0.844	0.015	0	Macrophage	AIF1
0	3.43492	0.623	0.009	0	Macrophage	C1QC
0	3.31705	0.871	0.056	0	Macrophage	FCER1G
0	3.30845	0.807	0.208	0	Macrophage	CTSB
0	3.28558	0.255	0.022	0	Macrophage	CCL20
0	3.28323	0.998	0.923	0	Macrophage	FTL
0	3.22695	0.263	0.021	0	Macrophage	SPP1
0	3.19736	0.761	0.035	0	Macrophage	HLA-DQA1
0	3.16266	0.777	0.049	0	Macrophage	HLA-DQB1
0	3.09435	0.741	0.01	0	Macrophage	MS4A6A
0	3.07426	0.453	0.043	0	Macrophage	CCL4L2
0	3.05943	0.522	0.076	0	Macrophage	CCL4
0	3.04405	0.73	0.307	0	Macrophage	CTSD
0	3.01352	0.503	0.029	0	Macrophage	GPNMB
0	2.95931	0.536	0.113	0	Macrophage	CXCL2
0	2.92622	0.516	0.078	0	Macrophage	G0S2
0	2.79113	0.902	0.356	0	Macrophage	NPC2
0	2.78238	0.704	0.009	0	Macrophage	MS4A7
0	2.76309	0.724	0.013	0	Macrophage	LST1
0	2.70886	0.769	0.074	0	Macrophage	HLA-DMA
0	2.7076	0.729	0.024	0	Macrophage	CD68
0	2.7035	0.393	0.051	0	Macrophage	CXCL3
0	2.68692	0.747	0.045	0	Macrophage	CTSS
0	2.64789	0.489	0.019	0	Macrophage	BCL2A1
0	2.63195	0.573	0.066	0	Macrophage	HLA-DRB5
0	2.57224	0.285	0.008	0	Macrophage	S100A9
0	2.55167	0.838	0.159	0	Macrophage	CYBA
0	2.49628	0.829	0.207	0	Macrophage	LGALS1
0	2.45761	0.863	0.453	0	Macrophage	PSAP
0	2.43962	0.629	0.07	0	Macrophage	PLAUR
0	2.42031	0.58	0.035	0	Macrophage	GPR183
0	2.40999	0.503	0.078	0	Macrophage	C15orf48
0	2.32887	0.677	0.031	0	Macrophage	HLA-DMB
0	2.30699	0.78	0.089	0	Macrophage	LAPTM5
0	2.27209	0.876	0.223	0	Macrophage	SRGN
0	2.19586	0.746	0.245	0	Macrophage	GRN
0	2.17383	0.612	0.007	0	Macrophage	FCGR2A
0	2.16081	0.614	0.006	0	Macrophage	IGSF6
0	2.13943	0.664	0.178	0	Macrophage	CTSZ
0	2.06967	0.718	0.111	0	Macrophage	RGS1
0	2.06295	0.635	0.105	0	Macrophage	CD83
0	2.05501	0.493	0.015	0	Macrophage	CD14
0	2.02905	0.662	0.198	0	Macrophage	MAFB
0	1.95224	0.603	0.008	0	Macrophage	RNASE6
0	1.94083	0.999	0.825	0	Macrophage	TMSB4X
0	1.93679	0.51	0.133	0	Macrophage	LGMN
0	1.93591	0.757	0.25	0	Macrophage	RNASET2
0	1.93363	0.586	0.053	0	Macrophage	CAPG
0	1.90936	0.487	0.009	0	Macrophage	C5AR1
0	1.905	0.56	0.082	0	Macrophage	PLIN2
0	1.89135	0.502	0.084	0	Macrophage	LIPA
0	1.89048	0.504	0.003	0	Macrophage	MS4A4A
0	1.87849	0.632	0.135	0	Macrophage	SGK1
0	1.85294	0.69	0.142	0	Macrophage	COTL1
0	1.83469	0.508	0.014	0	Macrophage	PLEK
0	1.82075	0.509	0.058	0	Macrophage	ALOX5AP
0	1.81522	0.437	0.009	0	Macrophage	FCGR3A
0	1.81033	0.497	0.026	0	Macrophage	PHACTR1
0	1.80197	0.615	0.031	0	Macrophage	ITGB2
0	1.79556	0.715	0.214	0	Macrophage	IER3
0	1.78617	0.579	0.182	0	Macrophage	CTSL
0	1.78581	0.419	0.022	0	Macrophage	HLA-DQA2
0	1.77351	0.487	0.005	0	Macrophage	CALHM6
0	1.76177	0.447	0.004	0	Macrophage	TREM2
0	1.76035	0.997	0.924	0	Macrophage	FTH1
0	1.75248	0.414	0.004	0	Macrophage	OLR1
0	1.74271	0.669	0.247	0	Macrophage	MARCKS
0	1.71622	0.496	0.011	0	Macrophage	TMEM176B
0	1.69875	0.452	0.01	0	Macrophage	GPR34
0	1.68904	0.354	0.049	0	Macrophage	SLC40A1
0	1.63097	0.518	0.006	0	Macrophage	CYBB
0	1.60473	0.563	0.033	0	Macrophage	LY96
0	1.59886	0.403	0.052	0	Macrophage	ACP5
0	1.59166	0.603	0.1	0	Macrophage	TYMP
0	1.58609	0.981	0.709	0	Macrophage	TMSB10
0	1.54359	0.557	0.008	0	Macrophage	SPI1
0	1.53703	0.637	0.176	0	Macrophage	CTSH
0	1.51694	0.663	0.17	0	Macrophage	S100A4
0	1.50948	0.6	0.052	0	Macrophage	FYB1
0	1.49794	0.503	0.02	0	Macrophage	FGL2
0	1.47815	0.655	0.152	0	Macrophage	RNF130
0	1.4752	0.658	0.188	0	Macrophage	FCGRT
0	1.47288	0.546	0.05	0	Macrophage	LSP1
0	1.45774	0.723	0.216	0	Macrophage	ARPC1B
0	1.45094	0.475	0.023	0	Macrophage	C1orf162
0	1.44943	0.554	0.073	0	Macrophage	CXCL16
0	1.43763	0.564	0.048	0	Macrophage	PYCARD
0	1.43254	0.273	0.017	0	Macrophage	TNF
0	1.42821	0.459	0.05	0	Macrophage	TNFAIP2
0	1.42709	0.449	0.003	0	Macrophage	MSR1
0	1.4269	0.506	0.123	0	Macrophage	IER5
0	1.42238	0.516	0.006	0	Macrophage	LY86
0	1.41457	0.556	0.067	0	Macrophage	KCTD12
0	1.41294	0.434	0.007	0	Macrophage	CPVL
0	1.40776	0.58	0.079	0	Macrophage	CTSC
0	1.39662	0.252	0.008	0	Macrophage	AC020656.1
0	1.37227	0.464	0.021	0	Macrophage	TGFBI
0	1.34792	0.33	0.002	0	Macrophage	SDS
0	1.34559	0.471	0.013	0	Macrophage	IL18
0	1.32569	0.506	0.107	0	Macrophage	DAB2
0	1.32254	0.455	0.003	0	Macrophage	LILRB4
0	1.30262	0.437	0.048	0	Macrophage	CFD
0	1.2943	0.464	0.048	0	Macrophage	OGFRL1
0	1.29169	0.512	0.044	0	Macrophage	RAB31
0	1.28992	0.453	0.002	0	Macrophage	CD86
0	1.28668	0.732	0.293	0	Macrophage	VAMP8
0	1.28596	0.494	0.055	0	Macrophage	AKR1B1
0	1.2732	0.996	0.742	0	Macrophage	B2M
0	1.26292	0.472	0.012	0	Macrophage	LAIR1
0	1.25865	0.376	0.042	0	Macrophage	SERPINB9
0	1.25204	0.593	0.125	0	Macrophage	FAM49B
0	1.24409	0.531	0.059	0	Macrophage	UCP2
0	1.23782	0.507	0.04	0	Macrophage	HCLS1
0	1.23489	0.57	0.066	0	Macrophage	CD53
0	1.23476	0.416	0.002	0	Macrophage	CSF1R
0	1.22574	0.349	0.002	0	Macrophage	VSIG4
0	1.21693	0.427	0.006	0	Macrophage	ITGAX
0	1.21418	0.422	0.002	0	Macrophage	CSF2RA
0	1.21137	0.251	0.014	0	Macrophage	LUCAT1
0	1.20422	0.61	0.103	0	Macrophage	GMFG
0	1.20223	0.562	0.116	0	Macrophage	AP1S2
0	1.20107	0.538	0.065	0	Macrophage	ZEB2
0	1.18692	0.362	0.003	0	Macrophage	MNDA
0	1.17845	0.349	0.002	0	Macrophage	CD163
0	1.17568	0.418	0.06	0	Macrophage	ARL4C
0	1.1748	0.589	0.075	0	Macrophage	CD37
0	1.16662	0.501	0.066	0	Macrophage	HCST
0	1.16169	0.343	0.012	0	Macrophage	CCRL2
0	1.15742	0.564	0.159	0	Macrophage	TPP1
0	1.1546	0.381	0.008	0	Macrophage	TMEM176A
0	1.14989	0.415	0.008	0	Macrophage	TNFSF13B
0	1.12982	0.428	0.033	0	Macrophage	LCP2
0	1.12718	0.422	0.054	0	Macrophage	PTPRE
0	1.1234	0.413	0.018	0	Macrophage	RASSF4
0	1.11909	0.387	0.008	0	Macrophage	C3AR1
0	1.11557	0.488	0.058	0	Macrophage	SAMHD1
0	1.09788	0.404	0.025	0	Macrophage	ADAP2
0	1.0961	0.512	0.125	0	Macrophage	MFSD1
0	1.07926	0.442	0.016	0	Macrophage	CD4
0	1.06425	0.47	0.091	0	Macrophage	GLRX
0	1.06329	0.418	0.082	0	Macrophage	CPM
0	1.06138	0.338	0.015	0	Macrophage	PLTP
0	1.05661	0.358	0.002	0	Macrophage	MPEG1
0	1.0563	0.536	0.055	0	Macrophage	GLIPR1
0	1.05483	0.409	0.003	0	Macrophage	CLEC7A
0	1.05457	0.302	0.006	0	Macrophage	OTOA
0	1.05385	0.478	0.037	0	Macrophage	EVI2B
0	1.04638	0.443	0.034	0	Macrophage	LGALS9
0	1.03682	0.382	0.027	0	Macrophage	STX11
0	1.03673	0.406	0.038	0	Macrophage	SNX10
0	1.03397	0.436	0.032	0	Macrophage	PLXDC2
0	1.03286	0.392	0.049	0	Macrophage	TNFSF13
0	1.03168	0.377	0.006	0	Macrophage	PILRA
0	1.02833	0.405	0.024	0	Macrophage	CD84
0	1.02334	0.659	0.153	0	Macrophage	FXYD5
0	1.0176	0.365	0.048	0	Macrophage	GM2A
0	1.01575	0.266	0.007	0	Macrophage	C3
0	1.01433	0.322	0.005	0	Macrophage	FCGR2B
0	1.01064	0.409	0.012	0	Macrophage	ADA2
0	1.00948	0.665	0.168	0	Macrophage	ARHGDIB
0	1.00753	0.307	0.042	0	Macrophage	PLA2G7
0	1.00601	0.285	0.016	0	Macrophage	PLAU
0	1.00246	0.386	0.064	0	Macrophage	MAP3K8
0	1.0013	0.332	0.005	0	Macrophage	SLCO2B1
0	1.00045	0.461	0.056	0	Macrophage	CD48
1.53e-307	1.20028	0.581	0.17	3.73e-303	Macrophage	CKLF
6.95e-300	1.53465	0.745	0.328	1.69e-295	Macrophage	LITAF
9.07e-290	1.01973	0.553	0.169	2.21e-285	Macrophage	MGAT1
3.07e-289	1.14062	0.5	0.143	7.47e-285	Macrophage	CREG1
1.28e-278	1.63962	0.723	0.32	3.11e-274	Macrophage	GLUL
3.96e-273	1.17207	0.536	0.17	9.63e-269	Macrophage	NINJ1
3.26e-271	2.1252	0.782	0.39	7.94e-267	Macrophage	CSTB
2.29e-268	1.08973	0.398	0.093	5.57e-264	Macrophage	ATP2B1-AS1
2.02e-266	1.16516	0.696	0.279	4.91e-262	Macrophage	RGS10
2.91e-266	1.42341	0.564	0.184	7.07e-262	Macrophage	REL
1.1e-263	1.48414	0.639	0.228	2.68e-259	Macrophage	RGS2
2.66e-260	1.06014	0.904	0.393	6.48e-256	Macrophage	HLA-B
3.97e-260	1.19872	0.596	0.214	9.66e-256	Macrophage	LIMS1
1.02e-258	1.56585	0.536	0.167	2.47e-254	Macrophage	TNFAIP3
3.95e-254	1.0129	0.426	0.099	9.61e-250	Macrophage	DUSP2
8.51e-248	2.02773	0.832	0.466	2.07e-243	Macrophage	NFKBIA
6.44e-242	1.28227	0.626	0.218	1.57e-237	Macrophage	LGALS3
6.88e-233	1.40938	0.734	0.323	1.67e-228	Macrophage	ID2
3.14e-224	1.30517	0.895	0.56	7.64e-220	Macrophage	S100A11
5.56e-224	1.41598	0.745	0.353	1.35e-219	Macrophage	SOD2
4.02e-221	1.31365	0.62	0.256	9.77e-217	Macrophage	CEBPB
1.79e-216	1.07772	0.817	0.337	4.37e-212	Macrophage	VIM
4.38e-211	1.10955	0.951	0.755	1.07e-206	Macrophage	ACTB
8.94e-209	1.81439	0.299	0.064	2.18e-204	Macrophage	AREG
1.89e-201	1.18792	0.728	0.378	4.59e-197	Macrophage	SDCBP
1.07e-197	1.17912	0.573	0.233	2.6e-193	Macrophage	CFLAR
1.23e-193	-3.23275	0.754	0.825	2.99e-189	Macrophage	KLK3
7.62e-175	1.13645	0.885	0.553	1.85e-170	Macrophage	ITM2B
6.16e-172	1.19893	0.465	0.183	1.5e-167	Macrophage	PLD3
1e-170	1.03537	0.701	0.357	2.44e-166	Macrophage	ASAH1
8.19e-170	1.12137	0.661	0.323	1.99e-165	Macrophage	BRI3
1.92e-152	1.13385	0.402	0.145	4.67e-148	Macrophage	NFKB1
2.51e-152	-2.57011	0.678	0.737	6.1e-148	Macrophage	KLK2
4.09e-144	1.21356	0.518	0.213	9.94e-140	Macrophage	HSPA6
2.47e-126	-2.53973	0.441	0.626	6.01e-122	Macrophage	PDLIM5
1.9e-116	1.12704	0.95	0.773	4.61e-112	Macrophage	HSP90AA1
5.62e-116	-2.57267	0.274	0.535	1.37e-111	Macrophage	TRGC1
2.07e-103	-2.36735	0.546	0.65	5.03e-99	Macrophage	H2AFJ
5.18e-98	-2.69154	0.31	0.527	1.26e-93	Macrophage	SPON2
3.07e-92	-2.60724	0.298	0.531	7.47e-88	Macrophage	TFF3
8e-86	-1.52128	0.085	0.36	1.95e-81	Macrophage	IGFBP2
3.93e-83	-2.00956	0.236	0.452	9.55e-79	Macrophage	KRT18
8.13e-83	-1.66576	0.424	0.56	1.98e-78	Macrophage	DSTN
1.22e-82	-2.12657	0.213	0.438	2.98e-78	Macrophage	TSPAN1
1.91e-82	-2.26845	0.148	0.409	4.66e-78	Macrophage	LINC01088
1.4e-81	-1.07005	0.052	0.314	3.41e-77	Macrophage	NFIB
3.42e-78	-2.16311	0.069	0.324	8.31e-74	Macrophage	CCN1
4.89e-76	-1.31168	0.124	0.363	1.19e-71	Macrophage	NPDC1
3e-74	-1.79058	0.184	0.406	7.3e-70	Macrophage	KRT8
3.24e-74	-1.85077	0.167	0.391	7.89e-70	Macrophage	MESP1
5.39e-74	-1.67242	0.108	0.349	1.31e-69	Macrophage	PART1
7.28e-73	-1.79029	0.135	0.366	1.77e-68	Macrophage	STEAP2
8.34e-73	-1.24721	0.031	0.267	2.03e-68	Macrophage	SLC9A3R2
1.68e-71	1.08666	0.52	0.305	4.1e-67	Macrophage	BAG3
3.81e-69	-1.84345	0.143	0.366	9.28e-65	Macrophage	FOLH1
7.92e-69	-2.11137	0.205	0.409	1.93e-64	Macrophage	PCA3
1.19e-68	-3.08435	0.071	0.301	2.89e-64	Macrophage	CLU
1.42e-68	-1.16702	0.076	0.309	3.46e-64	Macrophage	BCAM
8.03e-67	-1.52569	0.121	0.342	1.95e-62	Macrophage	PLPP1
9.26e-66	-1.68378	0.144	0.357	2.25e-61	Macrophage	NKX3-1
1.9e-64	-1.76291	0.169	0.385	4.62e-60	Macrophage	AZGP1
2.42e-64	-1.60095	0.159	0.371	5.89e-60	Macrophage	TMPRSS2
1.98e-63	-1.92114	0.263	0.445	4.81e-59	Macrophage	FXYD3
2.53e-63	-1.27259	0.109	0.329	6.15e-59	Macrophage	TSPAN13
1.16e-62	-1.22022	0.722	0.693	2.83e-58	Macrophage	MIF
2.23e-62	1.0537	0.794	0.574	5.42e-58	Macrophage	HSPA1B
3.22e-61	-1.53972	0.128	0.337	7.83e-57	Macrophage	GOLM1
1.21e-60	-1.20279	0.32	0.484	2.95e-56	Macrophage	C12orf57
5.31e-59	-3.13354	0.099	0.3	1.29e-54	Macrophage	MGP
1.76e-58	-1.18735	0.072	0.286	4.28e-54	Macrophage	CRNDE
3.31e-58	-1.11478	0.706	0.675	8.05e-54	Macrophage	GAS5
5.22e-58	-1.74794	0.071	0.278	1.27e-53	Macrophage	CALD1
3.05e-57	-1.42202	0.09	0.292	7.41e-53	Macrophage	OR51E2
4.81e-57	-1.5745	0.127	0.333	1.17e-52	Macrophage	ABCC4
5.19e-57	-1.27193	0.072	0.275	1.26e-52	Macrophage	SPOCK1
4.59e-56	-1.52056	0.136	0.331	1.12e-51	Macrophage	SLC45A3
4.74e-56	-1.51698	0.122	0.326	1.15e-51	Macrophage	TRPM8
3.02e-55	-2.04313	0.118	0.317	7.34e-51	Macrophage	MIPEP
8e-55	-1.02447	0.06	0.256	1.95e-50	Macrophage	SLC4A4
6.03e-54	-1.18923	0.097	0.296	1.47e-49	Macrophage	ALDH1A3
1.67e-53	-1.48612	0.102	0.297	4.08e-49	Macrophage	CPE
3.59e-53	-1.3104	0.124	0.317	8.73e-49	Macrophage	LRRC26
5.19e-53	-1.09735	0.092	0.287	1.26e-48	Macrophage	FOXA1
6.71e-53	-1.16885	0.116	0.311	1.63e-48	Macrophage	SPDEF
1.14e-51	-1.39715	0.135	0.327	2.78e-47	Macrophage	TACSTD2
2.3e-51	-1.1606	0.119	0.311	5.6e-47	Macrophage	SNHG19
2.53e-49	-1.84504	0.359	0.47	6.14e-45	Macrophage	RDH11
2.55e-49	-1.65106	0.219	0.375	6.2e-45	Macrophage	TRPM4
2.55e-48	-1.08123	0.103	0.288	6.22e-44	Macrophage	SNHG14
2.64e-48	-1.34366	0.191	0.357	6.43e-44	Macrophage	PMEPA1
1.08e-47	-1.17548	0.112	0.294	2.62e-43	Macrophage	ZG16B
3.31e-47	-1.10484	0.118	0.299	8.06e-43	Macrophage	MLPH
3.38e-47	-1.30358	0.159	0.329	8.23e-43	Macrophage	SLC39A6
9.71e-47	1.04229	0.393	0.219	2.36e-42	Macrophage	MT1G
2.04e-46	-1.48748	0.296	0.454	4.97e-42	Macrophage	TSC22D1
3.27e-46	-1.38183	0.178	0.342	7.96e-42	Macrophage	SORD
3.3e-46	-1.33176	0.533	0.568	8.02e-42	Macrophage	SNHG8
3.56e-46	-1.30985	0.141	0.318	8.66e-42	Macrophage	MCCC2
1.76e-44	-1.30181	0.088	0.267	4.29e-40	Macrophage	SYCE1L
2.09e-44	-1.23341	0.27	0.413	5.09e-40	Macrophage	PRDX2
3.63e-43	-2.77391	0.417	0.519	8.83e-39	Macrophage	MSMB
2.08e-42	-2.27771	0.115	0.277	5.07e-38	Macrophage	TM4SF1
4.15e-42	-1.14668	0.121	0.286	1.01e-37	Macrophage	CLDN3
7.23e-42	-1.18113	0.267	0.415	1.76e-37	Macrophage	BEX3
8.16e-42	-1.59431	0.575	0.566	1.99e-37	Macrophage	MPC2
1.02e-39	-1.8871	0.231	0.371	2.49e-35	Macrophage	ACPP
1.28e-39	-1.21739	0.118	0.285	3.11e-35	Macrophage	RAMP1
5.64e-39	-1.44706	0.231	0.373	1.37e-34	Macrophage	MGST1
4.37e-38	-1.16625	0.568	0.565	1.06e-33	Macrophage	PPDPF
1.04e-37	-1.02331	0.151	0.31	2.53e-33	Macrophage	TPM1
4.12e-35	-1.31368	0.115	0.267	1e-30	Macrophage	LINC00662
1.09e-34	-1.76858	0.268	0.388	2.64e-30	Macrophage	GDF15
1.18e-34	-1.25026	0.26	0.382	2.88e-30	Macrophage	TSTD1
1.4e-34	-1.20124	0.246	0.384	3.4e-30	Macrophage	NUDT4
4.39e-34	-1.15062	0.174	0.324	1.07e-29	Macrophage	SELENOM
2.87e-33	-1.10625	0.179	0.315	6.98e-29	Macrophage	NEDD4L
7.92e-33	-1.08332	0.147	0.295	1.93e-28	Macrophage	XAB2
9.84e-33	-1.13867	0.128	0.268	2.39e-28	Macrophage	NUDT8
1.89e-32	-1.14184	0.19	0.324	4.6e-28	Macrophage	TPD52
2.37e-31	-1.04652	0.181	0.319	5.76e-27	Macrophage	BNIP3
2.49e-29	-1.00647	0.308	0.408	6.06e-25	Macrophage	MARCKSL1
5.05e-29	-1.22091	0.285	0.384	1.23e-24	Macrophage	SNRPN
6.54e-29	-1.3012	0.177	0.297	1.59e-24	Macrophage	KLK4
1.99e-28	-1.12123	0.204	0.332	4.85e-24	Macrophage	CCNG2
4.25e-28	-1.29326	0.288	0.372	1.03e-23	Macrophage	HEBP2
4.37e-27	-1.08773	0.266	0.374	1.06e-22	Macrophage	GLO1
6.82e-27	-1.72099	0.184	0.294	1.66e-22	Macrophage	AGR2
3.3e-25	-1.35415	0.41	0.452	8.04e-21	Macrophage	DCXR
1.45e-22	-1.08716	0.204	0.313	3.54e-18	Macrophage	CLDN4
4.6e-21	-1.21876	0.259	0.345	1.12e-16	Macrophage	APP
5.78e-21	-1.11362	0.281	0.354	1.41e-16	Macrophage	PPP3CA
2.66e-19	-1.20233	0.311	0.387	6.46e-15	Macrophage	CYB5A
3.73e-15	-1.15418	0.208	0.286	9.08e-11	Macrophage	AMACR
4.49e-15	-2.17638	0.179	0.256	1.09e-10	Macrophage	PLA2G2A
2.82e-13	-1.01824	0.316	0.374	6.87e-09	Macrophage	MEAF6
1.02e-12	1.5729	0.386	0.335	2.47e-08	Macrophage	SELENOP
1.39e-11	-1.0786	0.326	0.229	3.38e-07	Macrophage	HMGA1
2.39e-10	-1.12297	0.461	0.447	5.81e-06	Macrophage	DHRS7
4.28e-08	-1.176	0.574	0.503	0.0010412	Macrophage	SMS
