# Supplementary material for: Comprehensive analysis of macrophage-related genes in prostate cancer by integrated analysis of single-cell and bulk RNA sequencing
Source: Aging (Albany NY). 2024 Apr 24;16(8):6809–38. doi: 10.18632/aging.205727 (PMC11087116; doi:10.18632/aging.205727)
Supplement: Supplementary Table 4 [file aging-16-205727-s005.xlsx]

## Sheet: Supplementary Table 4
Supplementary Table 4. Green module genes of WGCNA in TCGA.
MMP9
POU2AF1
STX11
CD48
DNASE1L3
IL1B
FASLG
CLEC2D
DERL3
ITGAX
VAV1
FDCSP
PLCB2
GBGT1
LAMP3
DRAM1
CTSE
FAM177B
TACR1
ADAMTS14
CHI3L1
MS4A7
IKZF1
ASGR2
LRRC8C
ZNF831
STK17A
LILRA1
FCER1G
FMNL3
PIK3R5
PTPRO
IL17REL
HLA-DRB5
PRR33
FCRL2
C1orf162
APOBEC3A
PIK3CD
PBX4
IRF8
FAM20A
HLA-DMA
EOMES
CCL18
TNFRSF9
GLYATL2
KMO
SLFN13
CD180
ITGAL
PDCD1LG2
ABCB4
TMEM154
EBI3
TAS1R3
SNX20
IGLL5
PLXNC1
CD84
HAVCR2
TMIGD3
PLCG2
TREM1
MS4A14
STAT4
THEMIS
POU2F2
TXK
RIPK3
LILRB1
CD22
FCRL6
PILRA
LRRC25
GPR132
BTN3A1
PIK3CG
CD1B
GPR68
DCSTAMP
LILRA6
SH2D1A
IL23A
PSMB9
ACAP1
RHBDF2
VOPP1
TRPV2
PARP15
TIGIT
FERMT3
TYMP
PHACTR1
SIRPG
XCR1
SIGLEC14
FXYD5
ANGPTL6
SYNDIG1L
NFATC2
HK3
NR1H3
DPEP3
KIF21B
NFAM1
APOC1
TNFRSF17
SPOCD1
ANKRD44
PSTPIP1
CYTIP
PATL2
ARHGDIB
IL18BP
TAGLN2
TLR7
CLEC10A
CD96
CCRL2
RCSD1
SEMA7A
IFITM3
GNLY
TMEM273
PRDM1
FUT7
HLA-E
CFI
ADAM8
PLBD1
ARHGAP4
RASGRP3
IFIT1
IFI44
TMEM176A
RIPOR2
PTPRC
RASGRP1
MUC1
CCL7
CASP10
TNFRSF13B
RSAD2
CCL19
JAML
ARHGAP15
NFKBIE
IL24
NLRP3
S100A8
NPL
SLC14A2
IFI27
BIN2
ZC3H12D
CYSLTR1
ETV7
FCHSD1
FYB1
IFI35
DAPP1
CD300LB
LTA
FLI1
PARP14
CD300E
TRIM22
CLECL1
GPNMB
PHF11
RAB42
ADGRE1
SIRPA
LGALS9
TMEM156
PIM2
PSMB8
OASL
GZMB
CLEC4F
CLEC2B
IL18R1
N4BP2L1
APOBR
GP1BA
P2RY6
STAT5A
GCSAM
FCGR3B
FLT3
KLRC1
CCL11
ABI3
CD82
HLA-DRA
CXCR3
CLEC9A
HCK
SPN
KLRD1
LAIR2
GZMK
JAK3
RASGEF1A
BCL11B
SERPINA1
IFNAR2
PRF1
SIGLEC7
SIRPB1
SASH3
SLC16A3
FGR
BCAT1
ZBP1
MNDA
MILR1
CD101
GPSM3
RAC2
TMEM255A
RHEBL1
LSP1
ITGAD
GIMAP1
IFI30
PLAAT4
SLCO2B1
BTK
C16orf54
TMEM52B
FAM78A
CD1A
CLEC17A
CMKLR1
LAIR1
RAB32
RNASE6
SELPLG
MEI1
ITK
CTSZ
ALOX5AP
ADCY7
LY6E
GRAP
LAG3
TRAF5
SAMHD1
INSL3
BST2
MREG
HOXB4
IL18
TMEM150B
CXCL13
CRIP1
CD86
CCR2
TNF
CR2
HLA-DRB1
CD37
IL7R
MX2
ARHGAP9
SIT1
PTPRE
AQP9
NCF1
GFI1
TREML1
GPR84
ABCD2
ICAM5
TBC1D10C
HAPLN3
HLA-C
EVI2B
IFIT2
TNFSF13B
CASP4
HAMP
CD2
MMP25
IL21R
PLCXD2
TAP2
DOCK2
CASS4
KLHDC7B
TBX21
IKBKE
REC8
ADAMDEC1
MYBL1
F13A1
CD40LG
NFKB2
UPP1
KCNA3
FCGR3A
LY75
PDE6G
ADGRG5
EVI2A
C1QC
NCF4
KBTBD8
APOL3
GPR18
SLC1A3
TLR8
RGS18
ADAM28
DHRS9
CD247
SLAMF7
FLVCR2
GZMA
CD83
BATF3
MICB
PTPN6
HCLS1
CCR4
CALHM6
SERPINB9
SECTM1
SLC37A2
ITGB2
TMIGD2
UBASH3A
S100A9
SAMD3
TMEM45A
BATF
TOR4A
MARCHF1
CPVL
EGLN3
TREM2
SDS
CD3G
ICAM3
CLEC12A
SIGLEC8
MS4A4A
TAGAP
TAP1
VENTX
CEACAM4
OSCAR
IL12RB2
CLEC4E
LCK
CHST13
SIGLEC10
RUBCNL
ZCCHC18
TNFAIP8L2
SNAI3
TNFRSF4
ZAP70
SPI1
SH2D2A
ARPC1B
IER5L
KCNJ10
CXCL10
STK10
C11orf21
IL4I1
GZMH
FCRL1
SYK
TMEM71
C4B
CXCR4
BLK
CCR1
CD244
RASGRP4
TRAF3IP3
C3AR1
VSIG1
IFI44L
PKD2L1
FCER2
AGAP2
CPNE5
ARHGAP45
CD80
ZMYND15
NCF2
ERFL
PCED1B
FYN
GPR174
TNFSF18
APOBEC3D
DNAJC5B
XAF1
FSD1
HMOX1
VPREB3
CCL22
WDFY4
SAMSN1
CTSC
HVCN1
GALNT6
RASAL3
CD300C
NCR3
CMPK2
CCR5
RGS19
RAB33A
CTLA4
CD69
OR52N4
TCL1A
SLC4A8
RASSF4
CCDC88B
MAP3K8
CD163
CD70
AKNA
IL10RA
CHST11
FOLR2
GBP4
LRRC4C
GPR82
ITGB7
LILRB4
KCNAB2
C1QA
SLC15A3
CD19
TLR6
LY96
RUFY4
GMFG
LILRB2
IL32
CD274
CORO1A
NFKBID
CD3E
TRAT1
CD226
SAMD9
YWHAH
IRF4
VNN3
BCL2A1
TMPRSS3
MARCO
GPR162
UBA7
TMC8
M1AP
FCRL3
IGF2BP2
RHOH
PIWIL4
SIGLEC1
MSR1
CD8A
CD7
RNF166
BTN3A2
GPR25
ARL11
ADGRE5
OR2I1P
SEZ6L
MRC1
APOBEC3H
MEFV
NABP1
PNOC
ARHGAP30
SOWAHD
P2RY10
LILRA4
CYBA
RGS13
IL16
SPP1
PLAU
LYZ
GSDMC
TMSB4X
IRF5
SP140L
WAS
IFNG
UCP2
PLEK
DOK3
XCL2
SRGN
GBP1
SPOCK2
C5AR2
RGS1
TM6SF1
ADA
HLA-DOB
MS4A4E
HLA-DQA1
SCML4
PTAFR
OSBPL3
MS4A1
PEAK3
CD1C
FGD3
CHIT1
CCR7
GBP5
MGAT3
SLC2A6
ADAM12
PTPN7
CARMIL2
KYNU
LILRA2
TLR10
PYHIN1
FPR2
TRAF1
AIM2
MLKL
CD1D
UNC13D
ARRB2
DENND2D
CATSPER1
SHFL
APOL1
STAT1
IL1RN
APOE
KLRG1
RAB37
CXCR6
FCHO1
SELL
PTGDR
RBP5
HPSE
FPR1
CCL17
SIRPB2
FCGR1A
GNB4
TNFAIP6
SKAP1
MYO1F
SEPTIN1
DPEP2
CXCL11
S1PR4
P2RY13
CHL1
COTL1
LILRB5
TRIM21
HLA-F
CXCL9
ARNTL2
PARP9
HLA-DPB1
CCL20
FCRL5
TNFRSF25
IL12A
MX1
PRAM1
IL10
PIP4K2A
RASSF5
FOXP3
DDX60L
CR1
FCN1
TSPAN32
IL12RB1
TNFRSF13C
GPR183
PIK3R6
C3
ACSM5
SP100
XCL1
CTSS
ADGRE2
CD6
SIGLEC9
CCL24
B3GNT3
NLRP6
IPCEF1
ITGAM
RELB
CLEC7A
CST7
SLA
BIRC3
RENBP
CSF3R
NLRC4
ARL4C
SPIB
IRAG2
PIK3IP1
CD209
AOAH
LY9
GPR15
KLRB1
CYTH4
IGSF6
LPAR5
EPSTI1
MIXL1
SHISAL2A
TRANK1
CYP21A2
PLSCR1
HLA-DQB2
FCMR
GPR55
MS4A6A
CD28
GNGT2
NKG7
TNFSF8
LILRA5
AIF1
C19orf38
HHEX
PPP1R18
GPR34
OLR1
FCGR2B
CD52
EHD1
TYROBP
IL12B
GPRIN3
HTR7
TCF7
GPR141
FGD2
CD300A
CXCR1
NRROS
PDCD1
HLA-B
CDX1
ATP8B3
TNIP1
LTB
CD27
APOL6
FCRLA
TNFSF14
NCKAP1L
RETN
NMI
CYBB
HLA-DPA1
SPNS3
NIBAN3
VCAM1
CCL13
FPR3
CD33
LGALS2
GRAP2
VSIG4
IFITM1
ESR2
SP140
MMP12
CETP
GYPE
CLIC2
RELT
S100A12
PRKCQ
CSF2RB
TLR1
SH3KBP1
RNASE2
SLAMF8
PSMB10
ZBED2
DOK2
IL2RB
CD72
CCL5
NUGGC
MFNG
TFEC
C1QB
NLRP1
CRTAM
CMTM7
VNN2
GHRL
MAP4K1
TNFRSF8
B2M
HCST
P2RY14
THEMIS2
CDK18
SAMD9L
IL15
IFIT3
CDC25B
ADA2
HLA-DQA2
LIMD2
BTN2A2
HLA-A
BIRC7
IER5
LST1
GIMAP4
CSF1R
INPP5D
GIMAP2
KLHL6
STAB1
APOBEC3G
TRIM69
CTSW
ADGRE3
PRR5L
NFE2
KLRF1
IL2RA
CD8B
SCIMP
FCGR2A
NOD2
CD200R1
WIPF1
NLRC5
UBE2L6
CD14
NFKBIA
MPEG1
SIGLEC12
GAPT
CD1E
SLC7A5
LYL1
ADORA3
OAS1
LCP2
BHLHE22
RTP4
CCR8
GZMM
CD79B
DOCK10
ARRDC5
DUSP18
CASP1
CD74
BATF2
ODF3B
CD53
SUSD3
PHEX
MCUB
APBB1IP
JCHAIN
MSC
VNN1
RGL4
LTK
IFI16
LY86
HERC6
CEACAM21
CD4
SLC7A7
PMAIP1
LAPTM5
ARHGAP25
HTRA4
PLD4
GPR171
OPTN
SLAMF1
ADAP2
NNMT
C5AR1
ST8SIA4
B3GNT7
EXOC3L4
PLAC8
ALDH3B1
BTLA
NME8
SH3BP1
GLIPR1
CARD11
CIITA
TMEM176B
DDX60
CYSLTR2
ZBTB32
IL2RG
SLA2
CADM3
IFIT5
PTGES
PLA2G2D
GIMAP7
PADI2
ADAMTS6
GAL3ST4
TLR2
CACNA2D4
PPP1R16B
TAPBP
IL1R2
HLA-DQB1
CD79A
LGALS3BP
CD3D
DOK1
CLEC5A
TNFAIP8L1
IL27RA
TNFRSF1B
HLA-DOA
VDR
IDO1
TRABD2A
CD300LF
LAX1
TESPA1
CX3CR1
FMNL1
MAP3K14
IL15RA
BTN3A3
NLRC3
RUNX3
IKZF3
GAB3
CD5
HLA-G
PTGIR
GPR65
SLC17A9
LILRB3
PARVG
ZNF683
ICOS
CARD9
IL18RAP
TMEM163
PTPN22
PAX5
SLAMF6
ITGA4
