# Supplementary material for: Comprehensive analysis of macrophage-related genes in prostate cancer by integrated analysis of single-cell and bulk RNA sequencing
Source: Aging (Albany NY). 2024 Apr 24;16(8):6809–38. doi: 10.18632/aging.205727 (PMC11087116; doi:10.18632/aging.205727)
Supplement: Supplementary Table 5 [file aging-16-205727-s006.xlsx]

## Sheet: Supplementary Table 5
Supplementary Table 5. Brown module genes of WGCNA in CPGEA.
SH3BGR
LURAP1L
KIF26B
EIF4ENIF1
ARPC2
NFIA
DIRAS3
OTOA
SP8
MIOS
MOB1A
SLITRK5
MYL12A
ZNF521
ZNF81
LONRF3
PXK
CDH26
PTGIS
TWF2
SLC29A3
ITM2C
HTR2B
USP37
SERPINE2
CRLF3
ADAMTS6
THEMIS
ABI1
EPAS1
MSRB3
NRM
YBX3
CYP21A2
GMFG
HPS5
SMC1A
TUBG2
ITGB8
PIK3CG
PON3
MBTPS2
DYSF
HDLBP
AURKC
AZIN2
GRIK2
FAM72A
CACNA1H
SLC22A4
CSNK1G3
IK
AGPAT4
PLEKHA4
MFSD6L
CLEC4F
GALNT2
HYI
IRF2
CALCA
ECI2
ACO1
SYN1
MED30
LAMC2
HFE
ADH1B
ABCB4
FLT4
HLA-DPA1
GCNT4
FPR2
NR2F1
LYAR
PSMB9
SORBS1
TF
KAAG1
PDK4
KSR1
FGFR2
PARP14
CDKN2B
AMMECR1
CHRDL1
SPAG4
SNX5
TRABD2B
CDK18
GPR89A
FAM122C
CORO2B
ABCA7
OR52N4
TOR1AIP1
TSPYL1
ADAMDEC1
HGF
SLC18A2
MR1
MTFR1
RIMS4
PTPRCAP
COG5
MYOZ3
SOX21
RNF41
SLC2A4
SPRY3
PPIC
FAM78A
LHFPL1
SEMA6B
WDR93
ACSF2
YY1AP1
KBTBD8
EOGT
DENND5A
MYADM
IGFBPL1
IFNGR2
XPO7
LOXL1
ANKRD29
ZNF330
HECW2
ADAR
TBC1D10C
GFPT2
FCRLA
ILK
LGALS3
IFITM10
KRBOX1
SNTB1
MID1
MYOF
PTPRG
FLNA
PDLIM7
ZNF80
NNT
C1GALT1C1L
ANK3
ALDH3A2
C7orf31
SRGAP2
SCN9A
RASSF6
COL22A1
SDC2
SLC47A1
ALPK1
RPGR
CHIC2
CDC42EP3
CLEC4D
YBEY
CLEC4E
PLSCR4
TNXB
BLMH
GALNT12
ABCA5
LRRC18
TNFAIP8L3
EMCN
SLC9B2
BDH2
DEPDC5
GNA13
TTC28
PEPD
CYP2S1
AXL
ATP13A4
MTX2
RASL11A
STEAP2
KCNB1
ADPRM
CYSTM1
RERGL
TMPRSS11E
RGCC
KLHL5
FAM149A
IFT80
STXBP1
ANGPTL2
RARS2
SCML4
ARHGAP24
PPP1R16B
GZMA
TSPAN4
ALG14
HAUS2
PARP6
PAQR5
SOBP
BNC2
CCL13
DLX3
TIAM1
TSPAN7
TAP1
C4orf33
COL10A1
BATF
SIGLEC10
IL17RE
SRP68
ST6GALNAC4
POMC
EXOC3L4
PLEKHF1
RNF111
SGCE
CASD1
SLFN5
CTSZ
RASGRP4
OR10A2
PGAP1
CPXM2
TMEM156
TAC1
TNFRSF1B
RIIAD1
SECTM1
KIAA1191
DDX24
OSBPL3
ST6GAL2
DERA
RGS4
CTBS
JMJD1C
MEFV
MTMR8
ZNF416
ASB9
YPEL2
GAS2L3
CTSA
PRR4
SOD3
ANKRD55
NUFIP2
PIK3R4
SVIL
TRIM33
GPR65
PHLDB1
ANKRD13A
SGCZ
TCF7L1
PRUNE2
GPATCH11
HSPB8
SFRP4
CTTNBP2NL
ZNF267
RNPC3
GNB4
ADAMTS10
TRAT1
ZNF436
STK33
PTGER3
SLC7A13
PIK3AP1
ARAP1
S100A4
PLEKHG4
RAC2
C22orf23
PLXDC2
CCR5
GPX2
TRIM21
SERPINA5
STX6
GLUL
RNASEL
TMEM150C
ZNF483
PCDHB16
POLN
SH3PXD2B
ST8SIA4
ADAMTS16
RBMS2
CEACAM6
SOX30
FGF18
ALOX5
AGO4
DUSP3
GALM
VASH1
MPP6
RIN2
LPAR6
ADAM12
HNRNPA1L2
SHC4
TMEM71
PBX1
NDUFA4L2
TPST1
TOR1AIP2
PRPH2
PTPRK
PRIMPOL
ERAP1
ENPP6
ERAP2
HS3ST3B1
SKA2
NOVA2
NDP
MAP4K5
CHAC1
NRG1
WWP1
SPARC
CLDN5
TDRD10
PTGDR
ZCCHC4
TGFA
CAMK2N1
UBXN10
LYN
LRRC43
SLTM
APOE
APOC1
PTEN
C3AR1
PARP3
CCDC28B
AIFM2
MRPL48
PDE4A
ASB8
ODF3B
MRAP2
CYP26B1
SRRM3
MAL
APELA
CDH19
VIP
PHF11
FAHD2B
CAPN6
PRDM2
ERP27
TMEM43
MTSS1
OSR1
MAMLD1
CRADD
MDK
ST8SIA1
CLEC4A
XYLT1
QPRT
ART3
ADAMTSL3
DLX5
FOXO1
ARHGEF17
GABRE
IER5
NMT2
TMEM45A
SNRK
LDOC1
EXT1
SHMT2
YAF2
MSL3
ZKSCAN7
OASL
WDR17
MACC1
CBX6
PKD2L1
ITGA2
DHRS7
MSX2
SAP30BP
VPS11
ZNF487
RPP25
PLPPR3
PARP2
GSTP1
POU2F2
FRZB
ITGAL
FMOD
IFI6
AHDC1
LPP
PCOLCE
STK17B
PHC3
TNIP1
MMP2
TREM2
STRADB
DUSP2
ADORA2A
SLCO3A1
MAL2
SLC38A3
C2orf42
TRAK2
NRXN3
CYTH4
CYSLTR2
FAM24B
AEBP2
DDX58
CMTM7
FBXL2
TSPYL5
SYTL4
CTSK
ADAMTSL4
EHD2
MAN1A1
RNGTT
GPR183
SLC38A11
SLC16A4
LDLRAD4
TMEM119
ICA1L
PPM1L
CTLA4
BMP3
GRIK4
MITF
ENTPD5
PLCD1
APOBEC3C
ORC5
DCC
KHDRBS2
MORF4L1
TNIK
FAM167A
CST6
FBN1
CHRD
THPO
NHLRC4
LSM14A
SLC43A3
IRAK4
CCDC151
KCNG3
FUT3
ACSL3
MATK
RPL39L
SYNPO2
ADCYAP1
ASXL3
RTP4
SMAP2
ARHGEF40
CD247
C4B
DTX4
LBR
ADPRH
EPHX1
PGM1
HUNK
PRELP
KPNA4
PDK3
HGD
TCEANC2
NF1
VKORC1L1
SIGLEC15
NIPSNAP3B
ABCA1
GPR137C
LYSMD2
HDC
SLC27A2
CLECL1
HAUS7
ARHGAP19
LCAT
COL21A1
EVI2B
MT1E
GPR173
U2AF1L4
HES1
GAS6
IL24
FCMR
FAM110C
APOBR
EIF4E3
TEKT2
CNOT4
KCNIP3
RRAD
RNF150
AQP11
SNX32
DOK4
ZBED6
ATF7IP
PLEKHG5
NPAS2
ZNF730
TRAF5
GEMIN5
ARAP2
FAM13B
ZNF280B
ASCC1
LIMD2
RIF1
RNASE1
CHI3L1
EID2B
CREB5
STYK1
PLTP
DKK1
NME8
F2R
ACTB
CD22
HTR2A
FGF14
NPC2
BTBD10
ZKSCAN4
CADM3
ITGB1BP2
ARPC5
STX11
IL2RG
BLOC1S5
BMS1
STOX1
RET
CYSLTR1
MT1X
DCBLD1
PIGH
TFEB
CAPN12
KCNQ1
PCSK7
COL4A3
C1GALT1
MAPK13
CORO1A
FBXO34
HLA-DRA
UBR2
GJB2
LMOD1
MKLN1
PLS1
FIBIN
ECHDC1
USP2
SERTAD4
FBXO25
CTSL
ANXA1
DOK3
FIP1L1
AQP1
KYNU
RARG
HACE1
ARHGEF2
GPR158
DERL3
MMP11
FCHSD1
PLCG2
CA5B
CASP8
BTN3A3
CLIC3
PIP4K2A
TRIM44
SAR1B
MAOB
SYNM
JAK3
NSD1
DAB2
C3orf80
SRGAP3
ADGRG5
YBX2
ANKRD33B
LGALS9
MXRA7
P3H3
CD79B
ERVMER34-1
ADAM28
ZNF737
ITPRIPL2
MYO1A
IGFBP2
CRYGN
ZC3H11A
CHMP1B
TPM3
PLEKHG2
WDFY4
C2orf72
RAB12
LY96
HOXA11
CXCL14
SEMA3A
ZBTB26
RASL11B
CYB5R4
MCC
C11orf95
PLPP5
ALDH3A1
MYO9B
CD33
CEACAM5
CALB2
SLC6A16
CCL18
ZNF532
SMNDC1
NOTCH1
GPATCH1
SFT2D2
GIMAP7
DOCK3
FAS
C15orf65
CD6
TSPAN32
OAT
C1orf115
UBD
PPM1N
CCDC68
ZFP36L2
PDZK1IP1
TAL1
INO80D
FRRS1L
SCHIP1
CCND3
USF1
PITPNC1
SFRP1
FBXL7
C14orf28
ITGA5
ZNF208
SLC2A6
PIK3CD
PIK3IP1
SIK3
CEP295NL
GPD1
PLB1
SEMA6A
ARHGAP31
SCN4B
ZBTB7C
XCR1
HOXA7
GLB1
CAPG
STX2
COX4I2
SLC6A12
TIGAR
IL18R1
IL18RAP
IL1RL1
KLF12
SORCS1
MAP10
TXNIP
MMP3
CACNA2D1
CYP19A1
STRA6
SECISBP2L
MECOM
GJC1
TPSB2
KANK2
CDH13
CD5
SLC15A3
COMMD9
MMP12
TMEM254
DBN1
PDZRN4
SCN2B
MPZL2
CPA3
ZNF850
CYTIP
POC1B-GALNT4
CFI
ZCCHC18
CDC42SE2
ZC3H12D
COX7A1
CHST1
EMILIN3
TNFRSF13B
GFRA3
NIPAL4
P2RX5
ITGAE
EPHA6
AJUBA
BEX1
TTYH2
ZFP37
PLIN2
HS3ST2
HOXC10
PAM
IVNS1ABP
LEPR
ARHGAP21
CPEB3
OR56B1
AEN
NTN1
NUGGC
CALCRL
PIM2
EML4
SLC36A4
MYH9
FN1
STAT1
GLS
HSF2
JAKMIP1
TBC1D32
KIF19
KIAA0895
STK17A
BTBD19
KLK15
LYPD5
RELB
PTPN14
ARL2BP
ZNF423
PLLP
ARHGAP9
SYPL2
PRRX2
OSBPL8
C3orf14
CDK17
S1PR4
ZSWIM6
HCCS
FCER1G
GPR150
DBI
APOL2
DLGAP1
SIX2
PIPOX
PEG3
TMEM37
KCP
STXBP5L
EAF2
SCUBE3
FGD2
RC3H1
TMEM176A
RSU1
CUZD1
MMRN2
SLC2A14
SNCG
MXRA5
DGAT2
NKD2
MSANTD4
OSCAR
FERMT2
TMC5
FCGR2A
FDCSP
OR52H1
PUM1
PKIG
GALNT3
ITGB3
GFI1
SNAI3
SYK
IL1R2
MAPRE1
PLA2R1
WNT6
SP1
CD58
CNBD2
NUAK1
PPP3CA
ZNF14
PPM1M
IL4I1
HNRNPH3
CHCHD3
LRRN4CL
FAM234B
PRPF40A
PFKFB3
DLL4
ALDH1A2
TIMP4
ABTB2
SDHD
XDH
METTL7B
NTRK1
GORAB
SGTB
SUGCT
TMEM204
CACNA1A
THSD1
PRSS27
GNG12
FHL1
CCL4
ADA
APOL1
RHBDL3
GPR52
DDX60L
RGS2
RPE65
VIM
ZFAND5
ESAM
LDHB
SAR1A
SH3PXD2A
PHLDB2
MAML2
COL8A1
KMT2E
HDX
DOK5
NPY1R
FAM3D
ASB5
TMEM51
PAX8
ALK
ACVR1C
B3GNT8
PKD1L3
HTR1F
MS4A1
CAPN13
HOXD9
ERCC6L2
ERC1
SERGEF
TRAF6
TP53INP2
WT1
THEG
LPCAT4
UTP3
JCHAIN
MCCC2
CTNNBL1
FRY
COX17
PARP9
FNBP1L
TTLL7
ADCY5
CD83
FBXO9
JDP2
PTGR2
MFNG
BNIP3L
SPIN1
SLPI
LY6E
CLDN11
EPB41L2
SRPX2
PCGF1
AIM2
IFI16
PYHIN1
MNDA
MANBA
NFKB1
TGIF2
SS18L2
CRABP1
PLD4
ODF2L
KCNH2
GRID1
IGFLR1
PDE2A
EVI2A
IFITM2
NOG
EFHC2
ETV7
HLA-DRB1
UPP1
GIMAP8
NRTN
GAB3
SMTN
SEMA5B
BDNF
C5AR2
PPP1R18
UVRAG
GFPT1
AP3S1
TRA2B
TMEM200B
DAB1
GLIPR1L1
PRRX1
DHCR24
S1PR1
GK
IGF2BP2
MSRA
FABP4
LPXN
ROCK2
GPR17
FOXF1
NEDD4L
MET
COL6A2
RND2
RGS1
CEACAM4
GLI2
GIMAP6
CD300E
OR6A2
FOXQ1
GZMB
GZMH
HOXB7
LYPD1
GAL3ST4
SIDT1
MN1
CEP170
NAT8L
IKZF1
CCR8
RBL1
GZF1
CD93
NAPB
ABCB5
CLIC6
ATP8B3
TGM2
ZNF12
PARP10
KIF5C
CSF2RA
KCNK3
RHEBL1
TUBA1A
ZNF683
CYBRD1
CRTAC1
SCRN1
RSBN1L
HAVCR1
PCDHB15
TPM1
SFRP2
RNF175
LAG3
ETV3
KDM5A
ATP2C2
FSCN1
KIF2A
GPR161
LIX1
SCARA3
CHL1
CCDC88B
FGFR1OP2
KLRB1
CPS1
DGKH
KATNAL1
BEST1
GDF10
SLAMF6
VANGL2
GPR174
GMNC
PODNL1
ROBO1
PCDH7
MTURN
HCLS1
TFB1M
MUC1
CCL26
GDPD1
PLEK2
IRF1
IDS
OGDHL
MAP3K5
GSTK1
PPP2CB
HPS1
VPS37A
RAB7B
SPAG9
PSMG2
SASH3
DLL1
MTRNR2L8
AVL9
NLRC4
CALD1
PARP12
RHBDF2
TBXAS1
P2RY6
BICC1
C4A
EPB41
AKAP13
CSRP2
NMNAT3
TTC39C
S100A9
CHD1L
KHDRBS3
SDS
CORIN
ALDH1L2
RAB27A
VCAN
RARRES1
MGLL
SRPX
RASL10B
ERO1A
RNF182
SH3BGRL3
MKNK1
REEP1
NOD1
SGIP1
PINX1
COMP
IFITM3
SPP1
GMPS
FIGN
S100A16
DPYD
ASPN
SLC35F4
REV3L
SH3KBP1
FAM167B
NID1
DKK2
VRK1
ZNF831
ADRA1A
CHRNA2
AOAH
RBPMS2
NAV2
ANKDD1A
CIPC
TSPAN18
SYT15
SPIB
NFATC3
SNX9
TLR6
ARHGDIB
MGP
PPP1R1A
SMARCD3
ACSL4
C2CD4A
ANP32B
PITX1
DDX5
UTP6
RAD51C
NUP54
BMP2K
CXCL9
FRAS1
ACOT12
CSPG4
MAPK14
SLF2
ABCB1
TIMP3
ZNF124
SMIM12
KCNH1
DYRK3
CNIH3
OPTN
ITIH5
S100A11
UGP2
TMEM169
COL4A1
ZNF430
TNIP3
CACNB4
PAK1
FNBP1
SESTD1
TVP23A
NR1D1
CHMP4A
PDE10A
COPZ2
KDM1B
ALDH1A1
ADGRF1
PLAT
JPH1
TLCD2
FAT3
AHNAK2
GPR82
GPR34
CCNT2
FGF11
FASTKD3
TNFSF13
GPM6A
RAP2C
MRPS6
KHDC1
NT5E
TRMT11
MS4A4E
RPA2
POU2AF1
VAV3
GJA5
GLIPR1
FLT3LG
WSCD2
DYNLL1
NDST4
PCDH10
TMTC1
REM1
MMS22L
SHC3
VAMP5
RUNX3
FGFR1
ZNF883
DDAH1
LGI4
GBE1
TBC1D22A
SSH2
ZNF845
SUPT4H1
DOCK1
RIT1
ART5
IFNGR1
HLF
ZCCHC24
ZBTB10
UBA7
RGMA
TMEM17
RECK
RADIL
TMEM192
TGFBI
HRH1
WNK3
APOL3
PNMA1
SLC35G1
POSTN
RNF115
KCTD3
IL10
HLX
BHLHE22
CLSTN3
KLRG1
CDH6
ARRDC3
AMPD3
LYVE1
CHRNA7
LAPTM4A
NEDD9
SIGLEC1
IL7R
ACP5
ASXL2
CDKN1B
PPT1
CAP1
SF3A3
CISH
CXorf38
PCDH19
CLDN24
AS3MT
GALNT10
ABI2
PRELID2
BACE1
INPP5D
CHURC1
SLC35G2
ZNF608
FAM177B
SATB1
ABR
ZYX
CD69
TGFBR1
CSTB
DACT3
FBLN5
SLC24A4
MFGE8
CERCAM
STK38L
TMEM178A
CCL22
MSC
LMO4
MAS1L
COL6A3
FOXC2
USP24
PLPP3
ALDH1B1
FCHO1
DGKI
YAP1
VIT
PSMB10
AP4E1
RSBN1
PHTF2
MED28
SERPINB9
SMAGP
DDB2
GRAMD4
LPL
PDLIM4
COL11A1
PJA1
TPRG1
CCDC184
NCOA1
STAMBPL1
CH25H
GOLGB1
AVPI1
MCM6
BTBD11
TFRC
INPP1
CR2
BRAP
IQCJ-SCHIP1
LCN6
RFTN1
SH3BP5
CEP126
PARVG
PDLIM5
GBP2
ABCC6
ACADL
PHYHIP
FAM151A
ACOT11
ADAM23
HOXB6
PFN1
ACTR3
NTF3
ZFP36L1
TMEM87B
MYL9
HCK
CCM2L
FREM1
GIMAP1-GIMAP5
SPRY1
SLC5A1
PLPP7
GNGT2
MAPRE2
EVA1C
DTNBP1
MYCBPAP
PPP2R1B
AMOTL1
R3HCC1L
COL5A3
SLFN13
ATP1B2
ADGRL1
PCDHB14
PCDHB10
PCDHB8
PCDHB12
LTV1
CAPRIN1
DCUN1D3
NCR3LG1
TBCB
SLC18B1
NUP160
ISM2
IGFBP4
FKBP10
SMAD6
VNN2
IPCEF1
MCAM
NHLRC2
CAMK2G
KCTD17
SLC25A17
SLC20A1
CENPW
ZNF689
TCEAL7
DOC2B
EPS8
CDH11
CMTM3
TIMP1
MAP3K8
LUZP1
UMAD1
TREH
ATP1A4
SERPINB11
GPR15
FKBP15
BMF
TMEM154
STK4
GIMAP5
LRRC34
ACSL5
TMPRSS3
TFF3
UBASH3A
LPA
IL9R
GSDMD
ZBED2
MTUS1
HSPB6
HSPB7
ZFY
LRRC32
DPF2
RAB30
PRCP
LY9
CD244
ADGRB2
ANKRD53
NUP107
PPM1E
CAV1
CNN2
MYLK
P2RY10
NRP2
NPAT
TCTEX1D4
PIK3R5
IGFBP5
EFHD1
SIGLEC7
TUBE1
SAMD4A
SLIT2
DNASE2B
S1PR3
CNTNAP3
CMA1
SH2D2A
DACH1
ABHD6
SMIM14
BICD2
PDLIM3
SORBS2
NFASC
SYNGR3
GNS
PDXDC1
ZNF143
TMEM41B
MX1
SCYL3
C1QC
TUBGCP3
ACADSB
RNF34
PODXL
TMEM179
TRPM2
ADGRE3
PCED1B
FMNL3
IGF2
APOBEC3D
ARHGEF3
PDE6B
ZMYND15
PFKP
MACF1
GNPDA1
CMPK2
LPIN1
RSAD2
CBL
GSTM4
TET2
ABCC3
ENG
AK1
BTBD3
DTX1
MAP3K2
CD79A
SIGLEC8
CPEB1
KLHL2
FTSJ3
ZNF285
L3MBTL4
OR52B6
RIPPLY2
RARB
PLCL2
LZTS1
LYL1
SLC12A6
SLC25A19
ACKR1
TRERF1
F13A1
ZBTB43
HTATIP2
NUDT21
KNSTRN
ADGRE5
SLC6A1
FCHO2
DDIT4
MRPL2
LPCAT2
MT3
GBP5
GSDMA
BMP2
NRSN2
LRCH2
NINJ2
FAM90A1
DNAJC18
NMUR1
FMO2
SPATA5
GAP43
TRIM22
PTPRE
C1QA
HPSE
GADD45A
PSME2
THBS4
HLA-DQB2
KBTBD2
ATP1A2
HRH2
CPEB4
MOCOS
MFSD8
CXCL13
NTM
SEC24D
KIAA1755
ACTG2
IER5L
INSC
NHS
PAMR1
SLC30A3
IFI27L2
NEK9
VPS33A
TRPV2
LRRC4C
WNT10B
ASAP1
FAM76A
TBXA2R
MDFI
SAMD3
TMEM200A
MARVELD1
PI4K2A
TMED8
AKR1C3
SOX9
ICE1
DCHS2
SLA
TIMM10B
SNX18
SCML1
LIX1L
MILR1
AVPR1A
COL5A2
PSMB8
TAP2
ZBTB46
C21orf91
GLIS1
UBA5
RUNX1T1
CLUL1
P4HA2
CD248
FHOD3
TPGS2
IL13RA1
PLSCR1
ABRACL
DBP
RSPO2
DRAM1
PLXNC1
THADA
RHOA
C5orf58
SLC44A1
CEBPZOS
HEXA
EPG5
PSTPIP2
PRG4
S100A8
C1RL
TMEM117
PRICKLE1
LGALSL
SHE
EFHD2
CD200R1
ICOS
RYBP
ISYNA1
PDE4C
ANKRD22
RAI2
TMEM252
FAM153B
EIF1B
MRC2
OR51M1
ITIH3
CLIC5
PHF19
SVEP1
PGM5
PDGFRL
LY75
KLHL33
KCNK15
PLCD3
MPP7
MKX
SPOCK2
RNF152
MPEG1
MBD5
SERPINF2
MYO1G
CRYZL1
CRLF2
RNF19B
PRAP1
DDX60
ARHGEF15
GAPT
EMX2
DCPS
CST1
TCAF2
PDE1A
PRKCQ
OAS3
OAS2
ACVRL1
DCDC2C
PLA2G4C
SIGLEC6
MBOAT1
KDM3A
RBM3
CDKL2
VAPA
CD34
APOC2
NCOA3
PPP1R3C
LRIG2
FAM171A1
MPDZ
VENTX
ADAM8
SEMA5A
LCK
KCNQ5
NKD1
ZNF610
FERMT3
CADPS
RINL
PM20D1
KLHDC8A
PKDCC
SERPINH1
TENM4
RAB3IL1
FTH1
COL23A1
SCARF2
LILRA6
SLAMF8
DUSP23
RNF166
TAGLN2
SLC24A3
FZD7
RAMP3
CDCA7L
STEAP1
TREM1
ZNF350
CHRNB1
UBQLN3
UTY
ARSI
ZNFX1
CX3CL1
PIK3R6
CDC26
ZNF641
SNX6
CHIT1
TMCC2
CMKLR1
PCDHB7
WIPF3
WNT2B
C1orf162
PTGFRN
PTPN22
SORT1
CD53
PLA2G10
CLEC2D
MICAL1
ZNF711
ZNF286A
ISG15
SELL
TNFRSF17
KITLG
SYDE1
EPHX3
NFKBIE
HLA-DMB
PYGL
TRIM9
SLC12A1
CTSD
TTC23
MUC5B
MME
NUB1
ITGAD
TMEM178B
WDR7
RNF213
CFL2
ADCY7
TTLL6
TNC
OSTF1
INPP4A
RTTN
GREM2
CXCR2
SLC27A6
MEGF10
RAB3B
ITGAX
RSPO1
CPPED1
ZC3HAV1L
TMEM140
HERC1
UBE3D
THG1L
SNCAIP
ZDHHC15
DRP2
CRABP2
CTIF
IDO1
C20orf194
SUSD1
TNFSF13B
ADGRL3
KCTD20
GPR141
LTK
UGCG
KRIT1
TYROBP
MAP3K14
ZIM2
SCARA5
CD300LF
HARS2
FES
NPR2
LST1
KCTD14
LAMA3
RPRM
PCDH17
C18orf54
DCTN5
GLYATL1
TNS3
ST6GALNAC3
MAFB
VPS13C
ISLR
MUC12
HSD17B14
SAMSN1
KLRC1
ITGBL1
RUNDC3B
ICAM2
USP15
TMEM221
CD8B
C10orf105
NEURL1B
RHOXF1
IL17RD
APOC4-APOC2
UFSP2
ESYT2
RNASET2
EDEM3
NME5
LNX1
PTPRZ1
NR3C1
PTAFR
SLC8A1
IWS1
GNPTAB
ENO2
PTPN6
OR51I2
IFI35
DNAJB6
ETV5
VCAM1
RIMKLB
EXTL2
CCDC88A
TACR1
RAB31
WDR86
TRIP6
PRAME
UCHL1
C4orf19
C9orf24
C2orf76
PRKG1
CD209
ACSL6
RIPK2
CSMD2
SPSB1
PARVA
TNFSF14
TRIP10
C3
C4orf48
LAIR2
LAIR1
CLDN22
KCNA2
EPB41L4A
RAB39A
MRAS
PTPRU
FLT3
NABP1
CD80
IL12A
MYO7A
YPEL4
PRRT1
RDH11
SLC6A15
WDR82
LIG3
SKIL
PWWP2A
ARAP3
CHST2
TMEM251
PRR15
REEP2
NRP1
SERPINF1
APBB1IP
SHF
MRC1
DNTTIP1
HS3ST3A1
DHX35
PEX7
ITGA11
CLEC12A
RFX2
NRGN
HMG20A
SCAPER
RBFOX2
PTGDS
KCNK13
FBXO32
ATAD2
IRF8
MOXD1
ADAMTSL2
CCDC3
HCFC1R1
SCLT1
RAB9B
PCYT1B
KCNMA1
CCR10
IFI27
TMC8
SLC16A7
CNEP1R1
ELFN1
CACNA2D3
BTBD7
PKNOX2
PTBP3
WNK2
GPRIN3
TRIL
OR10A4
TLR7
ZNF257
TOR4A
ADAMTS8
CDSN
L1TD1
RBM38
TCEAL4
ADGRG2
FGR
RNF144B
TTC1
USP40
ZFC3H1
GPIHBP1
C11orf21
SFXN5
MFAP2
SYNPO
CASS4
TRIM47
KIAA0513
ITGA1
FSTL3
GGPS1
RNF217
RSPO3
ARHGAP18
THBS2
GPX8
TXK
XPNPEP2
EFCAB11
SETX
TGOLN2
TMEM163
MGAT5
EFNA3
C15orf39
ISLR2
JPH4
CBLB
ZDBF2
B4GALT1
GOLIM4
EOMES
OR7C1
FBLIM1
ARPC1B
ANP32E
MYOC
ANXA2
CNTLN
[truncated: 2,727 more rows]
