# Supplementary material for: Comprehensive analysis of macrophage-related genes in prostate cancer by integrated analysis of single-cell and bulk RNA sequencing
Source: Aging (Albany NY). 2024 Apr 24;16(8):6809–38. doi: 10.18632/aging.205727 (PMC11087116; doi:10.18632/aging.205727)
Supplement: Supplementary Table 6 [file aging-16-205727-s007.xlsx]

## Sheet: Supplementary Table 6
Supplementary Table 6. Red module genes of WGCNA in GSE70768.
STK10
ELF4
TUBA3E
SLC26A4
IL10RA
PLAC8
IGSF6
UBASH3B
HAPLN3
ITGB2
CCL18
PRDM1
TNFSF14
SIGLEC10
PLAU
SPOCK2
IDO1
HLA-G
CRIP1
KLRG1
HLA-DOA
RARA
CD79A
DUSP23
ISG20
FCGR2B
MMRN1
CYTH4
TPM3
HLA-DQB1
SH3GL2
BTK
GPSM3
CD53
CLEC12A
TGFBI
ARHGAP9
P2RY13
GSDMD
FLI1
BCL11B
LASP1
MAP4K1
HLA-H
CTSZ
IRF8
FCGR2A
SLAMF8
SLA
MLKL
FCN1
BLK
WIPF1
TMEM131L
BATF
DRAM1
VSIG4
PYHIN1
CHST15
HLA-A
PTPRCAP
IFITM2
NCKAP1L
TMEM71
CXCR6
LINC00857
GAPT
CD209
BTN3A2
IKZF1
CD247
RGS19
CCL21
TLR7
LTF
ARHGDIB
ZNF683
CASP4
CCR1
UBD
VNN2
SERPINB1
LEF1
TUBA3C
CST7
MRPS15
AIM2
CYBB
IER3
STAMBPL1
CPVL
NKG7
PSMB10
TMSB4X
IL2RB
SAMSN1
PIGR
MMP7
UCP2
CCL23
FYN
APBA3
CSF1R
LGALS2
SEMA4D
ETS1
POP5
IL27RA
PVRIG
LST1
FCER1A
CD27
COQ7
DPEP2
PECAM1
HLA-DRA
CCR6
TYMP
FCRLA
LAT
RHBDF2
TAGLN2
LCN2
MYO1G
SH3BP1
FGL2
CD300A
HAVCR2
CD2
HLA-DMA
PARVG
SPI1
EMILIN2
NCF1
SASH3
PYCARD
CMTM7
ITK
HCST
VPREB3
HLA-DOB
GBP1
VEGFC
RARRES3
TMEM121B
DOCK10
TNFAIP3
PSTPIP1
AIF1
FXYD5
CDH3
LOC643733
SH2D1A
DENND2D
IKBKG
MICB
ADAM8
LIFR
RAC2
AOAH
CD79B
TBC1D10C
APOBEC3F
GZMK
IFI16
GOLGA8S
CD96
GMFG
PCED1B
CARD9
S100A3
TRIM47
NCCRP1
CORO1A
CD68
CCR7
PTPN7
NNMT
LGALS9
NPC2
F13A1
CD3G
HLA-DRB3
NFKBIE
VAV1
CXCL13
TSPAN32
CTSA
CD1D
TNC
FAM3D
STX11
MS4A6A
CARD11
CD163
MYH9
PLCB2
PART1
SELL
LY96
FDCSP
RIPOR2
RASGRP3
PPP1R16B
WARS
CD4
HCLS1
CXCL16
HAMP
IGKV1ORY-1
TPP1
KRT19
GZMH
AQP2
PPP1R18
TMIGD3
C1RL
TTC30A
CD74
SH3BGRL3
HGD
C1QA
RHOG
CD3E
CD14
PRF1
APOE
MSC
HLA-DQB2
TAPBP
LPXN
CTSS
INPP5D
CYBA
CXCL9
FOLR2
IRAK2
NRROS
CD6
CYTIP
PSMB8
GIMAP8
CD33
PIM2
GIMAP4
HLA-DPB1
ITGAL
ARHGAP30
TAP1
SKAP1
SH2B3
CST4
HLA-DRB4
CD5
ETV4
C1orf162
ABI3
APOL3
GIMAP1
SIRPA
TNFSF13B
TNFRSF13B
TAP2
WAS
EOMES
SLCO2B1
HLA-F
ADAP2
EVI2B
CTLA4
DAB2
MFNG
MAFB
TNFRSF1B
HLA-E
ZBP1
PIK3CD
VCAM1
TNFRSF17
P2RY8
CCL19
LAX1
TBC1D2
AKNA
ARHGAP4
GBP4
HLA-DPA1
LAPTM5
FGD3
CCL5
CFB
FCMR
GIMAP7
ITGB7
IL32
SLC2A6
HLA-B
FKBP5
JAML
TYROBP
TRIM22
CD40
GZMA
RENBP
TRAF3IP3
RNASE6
STAP1
LEFTY2
NPL
CD19
CLECL1
NAPSA
COL22A1
LILRB3
STAT4
C1QC
CD37
IGFLR1
C3AR1
APOC1
TMEM176A
CXCL10
HCK
CD7
RASAL3
FGR
LTA
PLEK
MMP9
C1QB
FYB1
C1orf21
ALOX5AP
CXCR3
PSMB9
SAMD9L
DOCK2
GPNMB
APBB1IP
MCUB
APOBEC3G
AGA
EBI3
TUBGCP5
MVP
ADA
LRMP
ARPC1B
TAPBPL
GMIP
IFI30
LY86
ACAP1
HLA-DQA1
FSCN1
SLC7A7
GDPGP1
POU2AF1
CCDC32
MCM5
PLCG2
LPAR5
DNASE1L3
TRPV2
TTTY14
SYK
CD48
HLA-DRB6
KLRB1
IGLL3P
TMEM176B
SLC15A3
FLT3LG
TRHDE-AS1
RGS18
JCHAIN
GZMB
NCF1C
GBP5
FGD2
FCER1G
TMEM173
CCL22
MZB1
FPR3
OR2A9P
FLVCR2
ARHGAP15
CD52
ARHGEF35
TUBA3D
LYL1
NEURL3
CD3D
IL7R
ADGRE2
SLC16A3
FERMT3
BTN3A3
LTB
EPSTI1
PAPSS2
TM4SF19
WFDC21P
TRABD2A
SIGLEC14
CHIT1
HLA-DQA2
LOC100128398
APOBEC3D
