# Supplementary material for: Comprehensive analysis of macrophage-related genes in prostate cancer by integrated analysis of single-cell and bulk RNA sequencing
Source: Aging (Albany NY). 2024 Apr 24;16(8):6809–38. doi: 10.18632/aging.205727 (PMC11087116; doi:10.18632/aging.205727)
Supplement: Supplementary Table 8 [file aging-16-205727-s009.xlsx]

## Sheet: Supplementary Table 8
Supplementary Table 8. The result of univariate Cox regression analysis.
id	HR	HR.95L	HR.95H	pvalue
ITGAX	1.6195	1.2802	2.04872	5.84e-05
PLCB2	1.7245	1.29778	2.29153	0.000171925
ADAMTS14	2.89136	1.76649	4.73253	2.41e-05
MS4A7	1.55619	1.21587	1.99176	0.000444106
FCER1G	1.44346	1.12843	1.84643	0.00348041
PIK3R5	1.60555	1.18493	2.17548	0.0022525
IRF8	1.24414	1.02337	1.51254	0.0284014
HAVCR2	1.49914	1.14931	1.95545	0.00282264
LRRC25	1.36396	1.0085	1.84471	0.0439125
GPR132	1.35623	1.01811	1.80663	0.0372843
POSTN	1.22709	1.03714	1.45183	0.0170809
CXCR5	3.22323	1.20366	8.63135	0.0198699
PARP15	1.4371	1.04682	1.97288	0.0248984
FERMT3	1.44622	1.13052	1.85008	0.00332147
HTR1F	1.9045	1.14663	3.16328	0.0128281
TYMP	1.32897	1.07819	1.63806	0.00768467
C5orf46	1.22202	1.00422	1.48705	0.0452864
UGT2B15	1.1748	1.03352	1.3354	0.0137311
HK3	1.52548	1.11542	2.08631	0.00819925
DPEP3	2.18538	1.08464	4.4032	0.0287219
KIF21B	1.51131	1.07526	2.12419	0.0174184
SPOCD1	2.07754	1.25469	3.44003	0.00448652
FUT7	1.79969	1.14212	2.83585	0.011318
NPL	1.5101	1.12906	2.01973	0.0054678
BIN2	1.28655	1.00463	1.64758	0.0458756
OLFML2B	1.31112	1.05033	1.63667	0.0166687
LTA	1.4669	1.06171	2.02672	0.0201772
AKR1C1	1.3857	1.10073	1.74443	0.00548549
LGALS9	1.30075	1.01337	1.66963	0.0389942
FAP	1.28563	1.01912	1.62184	0.03403
LCN2	0.854211	0.782208	0.932843	0.000452718
OASL	1.22116	1.02837	1.45008	0.0226623
P2RY6	1.54873	1.13676	2.11	0.00556506
HCK	1.28253	1.00875	1.63062	0.0422501
SIGLEC7	1.79381	1.2031	2.67455	0.00414106
SIRPB1	1.96697	1.08643	3.56118	0.0255052
COL11A1	1.48872	1.19426	1.85577	0.000401953
SCARA5	0.718747	0.529249	0.976095	0.0344372
ITGAD	1.76526	1.06834	2.91682	0.0265575
COL8A1	1.21915	1.02146	1.4551	0.0281536
SLCO2B1	1.33154	1.05705	1.67731	0.015056
SYT4	1.24247	1.10287	1.39975	0.000356905
LAIR1	1.46488	1.10307	1.94535	0.00834519
SELPLG	1.28543	1.02678	1.60925	0.028488
ITGBL1	1.22955	1.02724	1.4717	0.0242572
GRAP	2.08784	1.05338	4.13817	0.0349484
TMEM150B	2.03653	1.31596	3.15165	0.0014113
CD86	1.40104	1.09206	1.79745	0.00798491
CD37	1.30348	1.06053	1.60209	0.0117905
ASPN	1.37122	1.15571	1.62693	0.000296111
HTR2B	1.50827	1.02017	2.2299	0.0393938
TREML1	2.43138	1.50285	3.93359	0.000295109
TBC1D10C	1.44035	1.15556	1.79533	0.00116907
HAPLN3	1.32881	1.06635	1.65586	0.011335
IL21R	1.4097	1.00404	1.97924	0.0473366
ITGA11	1.37345	1.11849	1.68653	0.00245586
TBX21	1.53894	1.08256	2.1877	0.0163069
ADAMTS2	1.35963	1.09676	1.68551	0.00507042
CNTN5	2.3141	1.17245	4.56741	0.0155815
HTR2A	1.82823	1.05	3.18324	0.0329723
C1QC	1.44982	1.15914	1.8134	0.00114005
NCF4	1.58285	1.23346	2.03121	0.000307544
HCLS1	1.33711	1.05501	1.69465	0.0162676
ITGB2	1.27422	1.02581	1.58278	0.0285051
SAMD3	2.12302	1.14725	3.92873	0.0165115
TREM2	1.59248	1.2801	1.98108	2.96e-05
SDS	1.47448	1.20106	1.81013	0.00020665
NPY	0.943346	0.893486	0.995988	0.0352869
SIGLEC8	1.51701	1.13826	2.0218	0.00446122
OSCAR	1.70659	1.25117	2.32778	0.000738762
LRRC15	1.46336	1.11201	1.92573	0.00657108
CHST13	4.7691	2.58108	8.81196	6.13e-07
SIGLEC10	1.44952	1.11025	1.89246	0.00635767
TNFRSF4	1.29594	1.02802	1.63368	0.0282504
ZAP70	1.35305	1.0957	1.67085	0.00496967
SPI1	1.50346	1.17028	1.9315	0.00142206
C11orf21	1.60087	1.06698	2.40191	0.023017
IL4I1	1.31283	1.04213	1.65384	0.0208741
TRAF3IP3	1.41525	1.06094	1.8879	0.0181615
C3AR1	1.40382	1.08858	1.81035	0.00894688
CD80	2.10007	1.22075	3.61277	0.007349
NOX4	1.5304	1.17483	1.99359	0.00160885
SAMSN1	1.31125	1.0045	1.71168	0.046264
RASAL3	1.44503	1.1422	1.82815	0.00215495
CD300C	1.75409	1.20865	2.54567	0.00310414
RAB33A	1.6104	1.18108	2.19576	0.00259469
ISM1	1.42654	1.10318	1.84468	0.00675464
IL10RA	1.28005	1.0168	1.61147	0.0355743
FOLR2	1.36461	1.09149	1.70608	0.00636744
LRRC4C	1.65253	1.16302	2.34807	0.00506998
LILRB4	1.52925	1.20088	1.94741	0.000572758
C1QA	1.35684	1.10203	1.67056	0.00403412
TMC8	1.32331	1.06442	1.64517	0.0116699
MSR1	1.44703	1.13589	1.8434	0.00277645
ARL11	1.6655	1.0446	2.65547	0.0320897
ARHGAP30	1.37017	1.07868	1.74043	0.00986479
LILRA4	1.96183	1.3796	2.78977	0.000175897
WAS	1.38371	1.08343	1.76723	0.00927017
CTHRC1	1.33979	1.15028	1.56053	0.00017042
HLA-DQA1	1.25466	1.03376	1.52275	0.0216747
FEV	0.811471	0.716395	0.919165	0.00101747
MGAT3	1.59136	1.1481	2.20574	0.00528562
ADAM12	1.77044	1.23948	2.52885	0.00168859
LILRA2	1.93641	1.1342	3.30603	0.0154616
CHI3L2	0.840621	0.715181	0.988062	0.0352375
VCAN	1.18645	1.00544	1.40004	0.0429505
APOE	1.36331	1.14856	1.61821	0.000394476
OSM	1.34378	1.08332	1.66686	0.00718828
FCHO1	1.60123	1.16041	2.2095	0.00416306
CCL17	1.26851	1.05269	1.52858	0.0124324
FCGR1A	1.82552	1.27447	2.61484	0.00102775
MYO1F	1.49766	1.1318	1.9818	0.00470893
DPEP2	1.69971	1.16496	2.47992	0.00592021
LILRB5	2.02214	1.32348	3.08961	0.0011305
OLFM4	0.91283	0.847472	0.983229	0.0161213
IL12RB1	1.42227	1.03821	1.94841	0.0282731
CSF2RA	1.43349	1.09056	1.88427	0.00984149
SUCNR1	1.19978	1.04892	1.37233	0.00789212
CCL24	1.31158	1.07599	1.59875	0.00725308
SLC6A20	2.66758	1.38841	5.12525	0.00323036
CLEC7A	1.55516	1.18689	2.0377	0.00136199
CSF3R	1.59155	1.15022	2.20223	0.0050383
CD209	1.4778	1.0043	2.17453	0.0475068
CYTH4	1.45784	1.1105	1.91383	0.00663197
IGSF6	1.41297	1.09727	1.81951	0.00737495
LPAR5	1.47585	1.07205	2.03173	0.0170069
HLA-DQB2	1.21851	1.02992	1.44164	0.0212445
MS4A6A	1.45689	1.14227	1.85817	0.0024327
HORMAD1	8.98141	1.40192	57.5396	0.0205323
AIF1	1.43348	1.13435	1.81148	0.00256407
OLR1	1.22876	1.00679	1.49966	0.0427082
FGD2	1.65863	1.20207	2.2886	0.00206743
CD300A	1.58709	1.19315	2.1111	0.00150816
KRT75	1.34063	1.08857	1.65105	0.00580438
ADAMTS12	1.61451	1.0893	2.39296	0.0170335
FPR3	1.38181	1.12142	1.70265	0.00239982
CD33	2.00868	1.17829	3.42428	0.0103836
RNASE2	1.47608	1.01738	2.1416	0.040297
DOK2	1.40982	1.10953	1.79138	0.00494709
CD72	1.52453	1.15906	2.00525	0.00256547
TFEC	1.5658	1.09437	2.24031	0.0141527
C1QB	1.37398	1.10683	1.70561	0.00397571
MAP4K1	1.32804	1.04165	1.69317	0.0220637
TNFRSF8	1.85894	1.10978	3.11384	0.0184869
COL1A1	1.37168	1.15346	1.63119	0.000350338
IL9R	3.7293	1.45877	9.53386	0.00598828
THBS2	1.19445	1.03276	1.38144	0.016648
LST1	1.36733	1.07348	1.74162	0.0112668
INHBA	1.24911	1.05243	1.48255	0.0109434
IL2RA	1.47186	1.11003	1.95163	0.00724965
FCGR2A	1.68846	1.28799	2.21346	0.000149362
CD14	1.32804	1.04134	1.69366	0.0222266
BHLHE22	1.69993	1.05032	2.75132	0.0307869
GZMM	1.27209	1.02814	1.57393	0.0267318
KISS1R	1.60025	1.18771	2.15609	0.0019954
APBB1IP	1.28279	1.00402	1.63895	0.0463656
MSC	1.31558	1.02823	1.68322	0.0291534
LY86	1.42093	1.10926	1.82016	0.00542352
LAPTM5	1.27215	1.02236	1.58298	0.0309102
HTRA4	1.54363	1.04263	2.28538	0.0301223
PLD4	1.3313	1.03407	1.71396	0.0264306
CARD11	1.29514	1.01561	1.65162	0.0370879
CIITA	1.39417	1.0624	1.82953	0.0165521
PAX1	1.24815	1.02577	1.51875	0.0268247
GAB3	1.57078	1.10131	2.24037	0.0126788
PLA2G4D	0.801109	0.651089	0.985695	0.0360685
PTGIR	2.58335	1.70812	3.90705	6.91e-06
GPR65	1.48057	1.02497	2.1387	0.0364923
SLC17A9	1.99115	1.39805	2.83586	0.000135025
PARVG	1.6927	1.26564	2.26386	0.000388165
COMP	1.18837	1.06545	1.32547	0.00194853
